# Supplementary material for: A database of water and heat observations over grassland in the north-east of Japan
Source: Copernicus journal article supplement (doi:10.5194/essd-10-2295-2018), 2018-12-18
Supplement: Supplementary file 1 [file essd-10-2295-2018-supplement.zip]

Archive with 8 entries (5 files):
- Supplement/
- Supplement/Supplement_Landuse.jpg
- Supplement/Datebase_A database of water and heat observations over grassland in the north-east of Japan.xlsx
- essd-10-2295-2018-supplement-title-page.pdf
- __MACOSX/
- __MACOSX/Supplement/
- __MACOSX/Supplement/._Datebase_A database of water and heat observations over grassland in the north-east of Japan.xlsx
- __MACOSX/Supplement/._Supplement_Landuse.jpg
