# Supplementary material for: A database of water and heat observations over grassland in the north-east of Japan
Source: Copernicus journal article supplement (doi:10.5194/essd-10-2295-2018), 2018-12-18
Supplement: Supplementary file 1 [file essd-10-2295-2018-supplement.zip › essd-10-2295-2018-supplement-title-page.pdf]

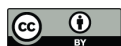

## *Supplement of*

# **A database of water and heat observations over grassland in the north-east of Japan**

**W. Ma et al.**

*Correspondence to:* Wenchao Ma ([wma@ied.tsukuba.ac.jp](mailto:wma@ied.tsukuba.ac.jp))

- [essd-10-2295-2018-supplement-title-page.pdf](#)
- Supplement
  - Database\_A database of water and heat observations over grassland in the north-east of Japan.xlsx
  - Supplement\_Landuse.jpg
- \_\_MACOSX
  - Supplement
    - \* .\_Database\_A database of water and heat observations over grassland in the north-east of Japan.xlsx
    - \* .\_Supplement\_Landuse.jpg

The copyright of individual parts of the supplement might differ from the CC BY 4.0 License.
