# Supplementary material for: A database of water and heat observations over grassland in the north-east of Japan
Source: Copernicus journal article supplement (doi:10.5194/essd-10-2295-2018), 2018-12-18
Supplement: Supplementary file 1 [file essd-10-2295-2018-supplement.zip › Supplement/Datebase_A database of water and heat observations over grassland in the north-east of Japan.xlsx]

## Sheet: All data
Date	Air_tempearture_average (℃)	Quality check (*incomplete; ***missing)	Air_tempearture_maximum (℃)	Quality check (*incomplete; ***missing)	Air_empearture_minimum (℃)	Quality check (*incomplete; ***missing)	Air_temperature_12.5m (℃)	Quality check (*incomplete; ***missing)	Air_temperature_29.5m (℃)	Quality check (*incomplete; ***missing)	ST1 0.02m Soil_temperature (℃)	Quality check (*incomplete; ***missing)	ST2 0.01m Soil_temperature (℃)	Quality check (*incomplete; ***missing)	ST3 0.05m Soil_temperature (℃)	Quality check (*incomplete; ***missing)	ST4 1.00m Soil_temperature (℃)	Quality check (*incomplete; ***missing)	TD1 Dew point_temperature_1.6m (℃)	Quality check (*incomplete; ***missing)	TD2 Dew point_temperature_12.5m (℃)	Quality check (*incomplete; ***missing)	TD3 Dew point_temperature_29.5m (℃)	Quality check (*incomplete; ***missing)	Precipitation (mm/day)	Quality check (*incomplete; ***missing)	Relative humidity (%)	Quality check (*incomplete; ***missing)	Shortwave radiation (W/m2)	Quality check (*incomplete; ***missing)	Net Radiation (W/m2)	Quality check (*incomplete; ***missing)	Longwave Radiation_Observation (W/m2)	Quality check (*incomplete; ***missing)	Longwave Radiation_Estimation (W/m2)	Quality check (*incomplete; ***missing)	Sensible heat flux (covariance) 1.6m ℃*m/s)	Quality check (*incomplete; ***missing)	Soil heat flux (W/m2)	Quality check (*incomplete; ***missing)	Air Pressure (hPa)	Quality check (*incomplete; ***missing)	Wind speed (m/s)	Quality check (*incomplete; ***missing)
1981-08-01	27.3		33		22		27.3		27.5		25		26.3		23.9		20			***		***		***	0			***	243.054		120			***		***	0.0147		8	***		***	0.9
1981-08-02	27.3		33.1		22.3		27.2		27.5		24		26.6		24.1		20.1			***		***		***	0			***	249.998		128			***		***	0.0139		11	***		***	0.98
1981-08-03	25.4103	*	30.6	*		***	23.5	*	23.8	*	22.9	*	25.3	*	23.3	***	21	***		***		***		***	0			***	232.637		113			***		***	0.0167		6	***		***	0.92
1981-08-04	25.6		30.9		20.3		25.6		25.7	***	24.9	***	27.2	***	25.2	***	24.6	***		***		***		***	0			***	291.665		142			***		***	0.0079	***	-15	***		***	1.74
1981-08-05	23	*	31.9	*		***	23.3	*	23.7	*	24.6	*	26.4	*	24.5	*	21.9	*		***		***		***	0.5			***	178.24		84			***		***	0.0266	*	0	***		***	0.91	***
1981-08-06	21.2		27.9		14.2		21.9		22.1		23.7		25.2		24.9		22.1			***		***		***	0			***	196.758		86			***		***	0.0167		-1	***		***	1
1981-08-07	22.9		28.1		18.7		23		22.8		24.3		25.2		24.6		22			***		***		***	0.5			***	166.666		80			***		***	0.007		2	***		***	1.34
1981-08-08	22.6		26.1		19.8		22.8		22.6		23.8		24.7		24.4		21.9			***		***		***	1.5			***	94.9068		47			***		***	0.0084		4	***		***	0.62
1981-08-09	24.3		29.5		19.4		24.4		24.3		24.5		25		24.1		21.8			***		***		***	0			***	157.406		77			***		***	0.0502	***	5	***		***	0.66
1981-08-10	25.6		32.2		20.5		25.7		25.6		25.4		25.7		24		21.7			***		***		***	0			***	172.453		89			***		***		***	5	***		***	0.82
1981-08-11	26.8		31.6		23.9		26.8		26.7		26.5		26.6		24.1		21.6			***		***		***	4			***	173.61		93			***		***	0.031	***	7	***		***	1.17
1981-08-12	26.4		29		23.9		26.6		26.5		25.5		26		24.2		21.6			***		***		***	0			***	70.6014		34			***		***	-0.0016		5	***		***	1.33
1981-08-13	24.2		28.4		22		24.3		24.3		25.1		26		24.2		21.6			***		***		***	3.5			***	208.332		112			***		***	-0.0066	***	5	***		***	1.16
1981-08-14	23.6		26.3		21.6		23.6		23.5		24.2		25.2		24.2		21.6			***		***		***	0			***	126.157		65			***		***	0.0076		5	***		***	0.92	***
1981-08-15	22.7		26.7		19.9		22.7		22.6		24.2		25.1		24.1		21.6			***		***		***	0			***	184.027		92			***		***	0.0214	*	5	***		***	1.79
1981-08-16	22.4		27.6		17.9		22.3		22.5		24.6		25.3		24		21.6			***		***		***	0			***	278.933		129			***		***	0.0139	***	6	***		***	1.5
1981-08-17	21.6		26.5		17.9		21.5		21.7		24.2		25.2		24		21.6			***		***		***	0			***	240.739		110			***		***	0.009	***	5	***		***	1.53	***
1981-08-18	24.1		29.7		18.2		23.7		23.8		25.3		25.6		23.9		21.6			***		***		***	0			***	228.008		111			***		***	0.0395	*	5	***		***		***
1981-08-19	25.9		29.5		22.6		26		26.1		25.9		26.2		24		21.6			***		***		***	0			***	134.258		62			***		***	0.0231	***	3	***		***	1.45
1981-08-20	24.5		27.9		22.3		24.4		24.6		25.4		26.2		24.1		21.6			***		***		***	0			***	173.61		89			***		***	0.0074	***	2	***		***	1.77
1981-08-21	23.5		26.8		22		23.3		23.3		24.5		25.4		24.2		21.6			***		***		***	3			***	72.9162		42			***		***	0.001		1	***		***	1.06
1981-08-22	25.3		28.6		23.3		25.4		25.7		24.6		25.3		24.1		21.6			***		***		***	29			***	94.9068	***	51			***		***	-0.0059		1	***		***	2.07
1981-08-23	25.7		30.7		22		25.9		26.1		24.7		25.4		24.1		21.9			***		***		***	29.5			***	141.203	***	69			***		***	-0.012	*	2	***		***	1.19
1981-08-24	23.9		29.3		18.6		24.1		24.4		24.5		25.4		24.1		22			***		***		***	0			***	237.267	*	109			***		***	0.0125		3	***		***	0.66
1981-08-25	23.3		28.1		16.9		23.4		23.7		23.9		24.8		24.1		22			***		***		***	0.5	*		***	170.138		83			***		***	0.0125		4	***		***	0.88
1981-08-26	27.2		30.6		24.7		27.1		27.3		25.5		25.9		24		22			***		***		***	1			***	182.869		97			***		***	0.0039		5	***		***	2.79
1981-08-27	27.5		31.6		24.5		27.5		27.7		25.5		26		24.1		21.9			***		***		***	0			***	201.388		96			***		***	0.0081		6	***		***	2.53
1981-08-28	21.3		22.5		20.6		21.3		21.4		22.1		24.1		24.2		22.3			***		***		***	37			***	45.1386		21			***		***	-0.0017		5	***		***	1.56
1981-08-29	24		27.9		20.7		23.8		23.9		23.7		24.3		24		22.7			***		***		***	0			***	114.583		62			***		***	0.0115		6	***		***	0.72
1981-08-30	27.2		32.3		22.6		27.3		27.5		25.9		26		23.9		22.5			***		***		***	0			***	249.998		124			***		***	0.0172		8	***		***	1.5
1981-08-31	26.3		33.4		22.1		26.6		27		26.3		26.7		24.1		22.4			***		***		***	0			***	234.952		114			***		***	0.0226		8	***		***	1.26
1981-09-01	24.6		28.9		21.4		24.4		24.7		25.2		26.2		24.3		22.3			***		***		***	0			***	179.397		91			***		***	0.0117		7	***		***	1.47
1981-09-02	25.5		30.6		21.4		25.3		25.5		25.2		26		24.3		22.2			***		***		***	0			***	162.036		78			***		***	0.0129		6	***		***	1.45
1981-09-03	23.5		26.9		21.2		23.5		23.8		24		25.3		24.4		22.2			***		***		***	0			***	135.416		64			***		***	0.0047		4	***		***	1.8
1981-09-04	26.6		29.4		22.2		26.6		26.8		25.1		25.8		24.3		22.2			***		***		***	6.5			***	124.999		56			***		***	-0.003		4	***		***	2.02
1981-09-05	20.7		22.5		18.5		20.7		20.9		21.9		24.2		24.3		22.2			***		***		***	0			***	94.9068		48			***		***	0.0006		4	***		***	1.02
1981-09-06	20.3		24.2		17.4		20.2		20.3		21.7		23.3		24		22.2			***		***		***	0			***	182.869		88			***		***	0.0152		4	***		***	1.14
1981-09-07	19.3		24.7		13.1		19.5		19.8		21.1		22.9		23.7		22.2			***		***		***	0			***	232.637		101			***		***	0.0203		5	***		***	1.08
1981-09-08	18.7		22.9		15.2		18.8		18.9		20.2		22.3		23.4		22.1			***		***		***	22.5			***	105.323		45			***		***	0.0136	*	4	***		***	1.15
1981-09-09	20.6		24.3		17.6		20.4		20.4		21.3		22.4		23.1		22.1			***		***		***	1			***	150.462		78			***		***		***	5	***		***	0.91
1981-09-10	20.4		25.2		17.6		20.3		20.5		21.1		22.6		22.9		22			***		***		***	4			***	109.953		48			***		***	0.0074		5	***		***	0.85
1981-09-11	19.1		22.2		16.5		19		19.1		20.1		21.9		22.8		22			***		***		***	0.5			***	135.416		69			***		***	0.0068		4	***		***	1.37
1981-09-12	17.6		19.4		16		17.5		17.6		19.2		20.9		22.6		22			***		***		***	21			***	50.9256		22			***		***	0.0062		4	***		***	0.61
1981-09-13	20.3		24.7		17.3		20.2		20.2		20.5		21.6		22.2		22			***		***		***	1			***	136.573		64			***		***	0.0113		4	***		***	0.9
1981-09-14	19.2		23.4		16.2		19.1		19.2		20.2		21.7		22.1		21.9			***		***		***	5.5			***	155.092		77			***		***	0.0152		4	***		***	1.04
1981-09-15	18.6		23.8		13.9		18.5		18.7		19.8		21.4		22		21.7			***		***		***	0			***	188.656		80			***		***	0.0186		4	***		***	0.79
1981-09-16	17.8		24.1		12.5		18.2		18.6		19		20.9		21.9		21.6			***		***		***	0			***	231.48		87			***		***	0.0183		4	***		***	0.92
1981-09-17	17.3		24.1		10.3		17.5		18		18.6		20.4		21.7		21.5			***		***		***	0			***	219.906		78			***		***	0.0209		5	***		***	0.87
1981-09-18	17.9		24.9		11.2		18.1		18.5		19		20.5		21.5		21.4			***		***		***	0			***	216.434		82			***		***	0.0218		4	***		***	0.82
1981-09-19	17.9		21.8		14.8		18		18.2		18.8		20.4		21.3		21.3			***		***		***	0.5			***	61.3422		24			***		***	0.0089		4	***		***	0.77
1981-09-20	18		20.6		15.6		18		18		18.4		20		21.1		21.2			***		***		***	22			***	45.1386		20			***		***	0.0049		4	***		***	0.69
1981-09-21	19.1		24		15.6		19.2		19.4		18.8		20.2		20.9		21.1			***		***		***	0	*		***	151.619		63			***		***	0.0109		4	***		***	0.97
1981-09-22	18.7		23.4		13.1		18.7		18.8		19		20.2		20.8		21			***		***		***	0			***	144.675		55			***		***	0.0153		4	***		***	0.75
1981-09-23	20		26.1		14.2		20.2		20.6		19.9		20.9		20.8		20.9			***		***		***	0			***	188.656		72			***		***	0.0177		5	***		***	0.74
1981-09-24	20.7		26.7		14.6		20.9		21.2		20.2		21.2		20.8		20.8			***		***		***	0			***	170.138		71			***		***	0.0139		5	***		***	0.76
1981-09-25	19.7		20.4		18.8		19.7		19.9		19.3		20.8		20.9		20.7			***		***		***	16			***	33.5646		13			***		***	0.0436	***	5	***		***	1.02
1981-09-26	20.2		21.5		19.2		20		20		20		21		20.9		20.7			***		***		***	10.5			***	39.3516		23			***		***	-0.0125	***	5	***		***	0.58
1981-09-27	22.6		28.7		18.6		22.5		22.6		22.1		22.5		20.9		20.7			***		***		***	0			***	188.656		94			***		***	0.0116	***	6	***		***	0.83
1981-09-28	20.1		26.3		12.3		20.7		21.1		21.3		22.5		21		20.6			***		***		***	0			***	133.101		43			***		***	0.0141		5	***		***	0.65
1981-09-29	15.9		19.2		12.7		16		16.2		17.7		20.1		21.1		20.6			***		***		***	0			***	121.527		48			***		***	0.0095		5	***		***	0.74
1981-09-30	17.7		21.3		13.7		17.6		17.7		18.1		19.7		20.9		20.6			***		***		***	0			***	96.0642		45			***		***	0.0107		5	***		***	0.76
1981-10-01	17.5		18.4		16.8		17.4		17.3		17.9		19.6		20.7		20.5			***		***		***	28			***	41.6664	***	15			***		***	-0.0143	***	5	***		***	0.67
1981-10-02	18.9		25.2		13.3		19.4		19.9		18.6		20		20.4		20.7			***		***		***	14			***	146.99	*	56			***		***	0.0108	***	5	***		***	0.67
1981-10-03	15.9		21.6		8.4		16.7		17.4		17.5		19.4		20.2		20.6			***		***		***	0			***	203.702		68			***		***	0.0156		5	***		***	0.87
1981-10-04	15.3		23.1		6.2		16		16.7		16.6		18.5		20		20.4			***		***		***	0			***	206.017		73			***		***	0.0083		5	***		***	0.25
1981-10-05	18.7		23.3		15.1		19.2		19.4		17		18.5		19.7		20.3			***		***		***	0			***	57.87		16			***		***	0.0019		5	***		***	1.2
1981-10-06	17		22.8		12		17.5		18.1		16.3		18.1		19.6		20.2			***		***		***	0			***	103.009		32			***		***	0.0051		5	***		***	0.75
1981-10-07	18		21.8		15.2		18.1		18.3		17.1		18.4		19.4		20.1			***		***		***	0			***	100.694		42			***		***	0.0041		5	***		***	1.07
1981-10-08	17.5		18.4		15.7		17.5		17.6		16.8		18.2		19.3		20			***		***		***	21			***	27.7776		11			***		***	0.0048	***	5	***		***	0.95
1981-10-09	18.4		21		17		18.4		18.4		17.8		18.7		19.2		19.9			***		***		***	13.5			***	21.9906		14			***		***	-0.0064	***	5	***		***	0.81
1981-10-10	18.5		24.2		11.8		18.8		19.2		18.5		19.6		19.2		19.8			***		***		***	0			***	193.286		71			***		***	0.0146		5	***		***	1.26
1981-10-11	16		21.6		10.7		16.2		16.5		16.8		18.6		19.2		19.7			***		***		***	0			***	164.351		64			***		***	0.0187		5	***		***	0.65
1981-10-12	16.5		22.1		12.4		16.8		17		16.8		18.4		19.1		19.6			***		***		***	0			***	119.212		35			***		***	0.0091		5	***		***	0.69
1981-10-13	16.9		22.5		9.8		17.1		17.6		16.4		17.9		19		19.6			***		***		***	0			***	159.721		65			***		***	0.0132		5	***		***	1.06
1981-10-14	17.1		21.1		10.7		17.6		17.7		17		18.5		18.9		19.5			***		***		***	0.5			***	91.4346		25			***		***	0.0061		5	***		***	0.69
1981-10-15	13.7		16.2		11.5		13.8		13.8		14.7		17		18.9		19.4			***		***		***	0			***	72.9162		34			***		***	0.0056		5	***		***	0.78
1981-10-16	12.7		16.6		8		13.2		13.5		14.3		16.4		18.6		19.4			***		***		***	0			***	68.2866		9			***		***	0.0082		4	***		***	0.62
1981-10-17		***		***		***		***		***		***		***		***		***		***		***		***	0	***		***		***		***		***		***	-0.0007	***	2	***		***	0.3
1981-10-18	15.4		21.9		8		15.8		16.2		14.8		16.5		18.1		19.2			***		***		***	0			***	160.879		59			***		***	0.0124		4	***		***	0.95	***
1981-10-19	17.5		24.1		11.4		17.7		18.1		16.3		17.4		17.9		19.1			***		***		***	0			***	159.721		59			***		***	0.0166		5	***		***	0.81
1981-10-20	14.8		19.7		11.9		15		15.2		15.7		17.5		17.9		19			***		***		***	0			***	148.147		52			***		***	0.0131		4	***		***	0.92
1981-10-21	14.1		17.1		11.7		14.4		14.6		14.6		16.6		17.9		18.9			***		***		***	0			***	76.3884		24			***		***	0.0039		4	***		***	0.79
1981-10-22	15.7		21.6		12		15.7		15.7		15.2		16.2		17.8		18.8			***		***		***	153			***	33.5646		11			***		***	-0.0253	***	5	***		***	0.99
1981-10-23	18.7		22.1		12.1		18.8		18.9		17.8		18.7		17.5		18.4			***		***		***	13.5			***	109.953		21			***		***	0.0187	***	4	***		***	0.99
1981-10-24	11.3		17.5		4.2		12.5		13		14		16.6		17.7		18.4			***		***		***	0			***	172.453		37			***		***	0.0154		4	***		***	0.87
1981-10-25	12.3		19.7		3.7		13.5		14.1		12.7		15.1		17.5		18.4			***		***		***	0			***	171.295		44			***		***	0.0176		3	***		***	0.82
1981-10-26	11.8		17.7		5.5		12.3		12.5		12.8		15		17.1		18.3			***		***		***	0			***	152.777		33			***		***	0.0131		4	***		***	0.84
1981-10-27	12.9		18.2		7.6		13.1		13.3		12.7		14.7		16.8		18.3			***		***		***	0			***	149.305		35			***		***	0.0063		5	***		***	1.07
1981-10-28	11.7		17.6		5.9		12.2		12.6		11.8		14.1		16.6		18.2			***		***		***	0			***	127.314		28			***		***	0.0103		4	***		***	0.73
1981-10-29	11.6		14.3		7.5		11.9		12.1		11.9		13.7		16.3		18.1			***		***		***	6.5			***	34.722		11			***		***	0.0048		5	***		***	0.61
1981-10-30	13.7		18.6		9		14		14.1	*	14.3		14.8		16.1		18			***		***		***	0			***	124.999		40			***		***	0.008		-1	***		***	0.78
1981-10-31	13.3		18.8		6.6		13.9		14.8		14.2		14.5		16		17.9			***		***		***	0			***	124.999		42			***		***	0.0133		0	*		***	0.58
1981-11-01	14.5		21.1		9.3		14.7		14.9		14.8		15.3		16		17.8			***		***		***	0			***	134.258		36			***		***	0.0096	*	0	***		***	1.26
1981-11-02	12.3		13.3		10.8		12.4		12.5		12.5		14.3		16		17.7			***		***		***	11.5			***	21.9906		6			***		***	-0.0007		0	***		***	2.14
1981-11-03	12.9		15.8		11.3		13.1		13.2		13.6		14.3		15.9		17.6			***		***		***	0			***	35.8794		9			***		***	0.0036		0	***		***	0.54
1981-11-04	13.6		17.2		10.6		14		14.4		14.2		14.6		15.8		17.5			***		***		***	0			***	79.8606		17			***		***	0.005		-2	***		***	0.56
1981-11-05	12		15.3		9.7		12.1		12.2		12.9		14.2		15.7		17.4			***		***		***	0			***	70.6014		20			***		***	0.0021		-4			***	1.02
1981-11-06	7.3		10.2		6.2		7.3		7.2		9.9		12.6		15.6		17.3			***		***		***	14.5			***	23.148		8			***		***	0.0143	***	-10			***	1.37
1981-11-07	7		8.1		6		6.9		6.7		10.1		11.8		15.3		17.2			***		***		***	0.5			***	25.4628		8			***		***	-0.0208	***	-6			***	0.5
1981-11-08	6.4		12.6		0.4		7.5		7.8		9.8		11.7		14.9		17			***		***		***	0			***	144.675		29			***		***	0.023	***	-8			***	0.64
1981-11-09	4.3		9.3		-0.3		4.9		5.2		7.5		10.3		14.5		16.9			***		***		***	0			***	69.444		9			***		***	0.0085		-9			***	0.45
1981-11-10	4.9		12.3		-0.8		5.8		6.1		7.7		9.9		14.1		16.7			***		***		***	0			***	148.147		32			***		***	0.0213		-8			***	0.61
1981-11-11	5.5		15.6		-0.4		7		7.7		7.4		9.6		13.6		16.6			***		***		***	0			***	135.416		25			***		***	0.0169		-7			***	0.8
1981-11-12	5.9		13.4		-0.9		7.3		8.4		7.2		9.3		13.2		16.5			***		***		***	0			***	134.258		27			***		***	0.0157		-6			***	0.58
1981-11-13	6.1		14.8		0.2		7.6		8.3		7.4		9.2		12.9		16.3			***		***		***	0			***	130.786		26			***		***	0.0192		-5			***	0.57
1981-11-14	7		15.4		-0.7		8.4		9.5		7.5		9.2		12.6		16.1			***		***		***	0			***	133.101		26			***		***	0.0153		-5			***	0.53
1981-11-15	7.3		14.5		0.5		8.1		8.7		8		9.2		12.4		15.9			***		***		***	0			***	84.4902		18			***		***	0.0117		-2			***	0.63
1981-11-16	10.4		20.6		4.7		11.1		11.4		10.1		10.4		12.2		15.8			***		***		***	0			***	107.638		27			***		***	0.0129		0			***	0.7
1981-11-17	8.6		12.4		6.4		8.8		8.8		9.4		10.6		12.2		15.6			***		***		***	0			***	90.2772		23			***		***	0.0087		-1			***	0.82
1981-11-18	5.1		11.8		0.3		6.8		7.4		7		9.7		12.3		15.4			***		***		***	0			***	130.786		15			***		***	0.0192		-6			***	0.47
1981-11-19	4.7		13.6		-2		5.9		6.7		5.9		8.4		12.2		15.3			***		***		***	0			***	124.999		15			***		***	0.0144		-5			***	0.56
1981-11-20	7.7		15		2.4		8.6		9.1		8.2		9		12		15.2			***		***		***	0			***	97.2216		18			***		***	0.0094		0			***	0.63
1981-11-21	8.5		13.1		3.7		9.1		9.5		8		9.4		11.9		15.1			***		***		***	0			***	78.7032		12			***		***	0.0036		-3			***	1.11
1981-11-22	5.4		12.2		-0.6		6.8		7.2		6.6		9.1		11.8		14.9			***		***		***	0			***	130.786		8			***		***	0.0145		-5			***	0.63
1981-11-23	1.7		5.3		-2.8		2.6		3.2		4.1		7.1		11.7		14.8			***		***		***	0			***	26.6202		-7			***		***	0.0037		-9			***	0.64
1981-11-24	9.1		17.6		1.1		9.7		10.2		7.3		8		11.4		14.7			***		***		***	0			***	123.842		25			***		***	0.0105		1			***	1.08
1981-11-25	7.3		9.6		4.1		7.5		7.4		7.2		8.5		11.2		14.5			***		***		***	0			***	46.296		10			***		***	0.002		-3			***	0.95
1981-11-26	6.4		7.5		5		6.4		6.3		7.5		8.6		11.2		14.4			***		***		***	10.5			***	33.5646		8			***		***	-0.0126	***	-2			***	0.96
1981-11-27	8		9.4		6.6		7.9		7.7		8.7		9.1		11.1		14.3			***		***		***	12.5			***	21.9906	***	7			***		***		***	0			***	0.66
1981-11-28	5.4		10.3		0.5		6.1		6.2		6.6		8.8		11.1		14.1			***		***		***	0			***	119.212	*	3			***		***	0.0099	*	-6			***	0.84
1981-11-29	3.5		8.7		-1.1		4.3		4.5		4.2		7.1		11		13.9			***		***		***	0			***	128.471		3			***		***	0.0109		-7			***	0.8
1981-11-30	3.4		8.6		-3.1		3.7		3.8		4.9		6.7		10.7		13.8			***		***		***	0			***	60.1848		11			***		***	0.0065		-4			***	0.72
1981-12-01	5.5		6.1		3.8		5.4		5.2		6.5		7.6		10.5		13.7			***		***		***	2			***	23.148		7			***		***	0.002		-3			***	1.16
1981-12-02	4.7		9.7		-1.7		5		5		5.1		7.3		10.4		13.6			***		***		***	0			***	130.786		7			***		***	0.0177		-6			***	1.77
1981-12-03	1		8.2		-4.9		2.9		3.5		2.9		5.9		10.2		13.5			***		***		***	0			***	123.842		-2			***		***	0.0104		-6			***	0.61
1981-12-04	0.9		9.9		-4.8		2.4		3.2		3.1		5.5		9.9		13.4			***		***		***	0			***	112.268		7			***		***	0.0121		-4			***	0.56
1981-12-05	3.2		11		-2.8		4.4		4.9		4		5.6		9.6		13.3			***		***		***	0			***	79.8606		-1			***		***	0.0062		-3			***	0.7
1981-12-06	3.7		10.5		-2.3		5.3		6.3		4.2		5.8		9.4		13.1			***		***		***	0			***	96.0642		6			***		***	0.0018	*	-3			***	0.64
1981-12-07	4.6		10.7		-1		5.3		6		5		6.2		9.3		13			***		***		***	0			***	91.4346		10			***		***	0.0103		-1			***	0.63
1981-12-08	3.3		10.4		-2.1		4.7		5		3.6		6		9.2		12.8			***		***		***	0			***	118.055		5			***		***	0.0112	*	-5			***	0.6
1981-12-09	2.9		12.3		-3.4		4.4		5.4		3.2		5.5		9.1		12.7			***		***		***	0			***	115.74		2			***		***	0.0117		-4			***	0.85
1981-12-10	3.2		10.2		-3.4		4.8		5.4		2.9		5.2		9		12.6			***		***		***	0			***	116.897		-6			***		***	0.0087		-1	***		***	0.65
1981-12-11	2.6		8.3		-3.6		3.4		4.3		3.3		4.9		8.8		12.5			***		***		***	0			***	72.9162		1			***		***	0.007		4	***		***	0.65
1981-12-12	5.4		14		0.4		6.8		7.2		4.6		5.8		8.6		12.4			***		***		***	0			***	106.481		4			***		***	0.0106		5	***		***	0.68
1981-12-13	5.6		10.3		1.2		6.1		6.3		3.1		5.5		8.6		12.2			***		***		***	0			***	120.37		-14			***		***	0.0148		4	***		***	1.97
1981-12-14	2.7		7.6		-1.1		3.1		3.3		1.7		4.6		8.5		12.1			***		***		***	0			***	116.897			***		***		***	0.0146		4	***		***	1.78
1981-12-15	1		7.4		-6		2.2		2.4		0.9		3.8		8.3		12			***		***		***	0			***	121.527		-11			***		***	0.014		4	***		***	1.46
1981-12-16	1.1		10		-5.3		4.2		4.9		1.1		3.5		8		11.9			***		***		***	0			***	116.897		-2			***		***	0.0114		4	***		***	0.57
1981-12-17	1.4		10.8		-3.9		3.4		4.3		1.7		3.6		7.8		11.8			***		***		***	0			***	114.583		0			***		***	0.0114		4	***		***	0.72
1981-12-18	1.7		10.2		-4.8		4		5		1.6		3.6		7.6		11.6			***		***		***	0			***	114.583		3			***		***	0.0103		4	***		***	0.56
1981-12-19	4.3		11.5		-3.7		5		5.6		3.2		3.9		7.4		11.5			***		***		***	1			***	87.9624		14			***		***	0.0147	*	4	***		***	0.7
1981-12-20	7.3		11.8		4.5		7.7		7.8		5		5.7		7.4		11.4			***		***		***	2			***	99.5364		4			***		***	0.0121	***	5	***		***	1.99
1981-12-21	4.2		11.8		-1.1		6.3		6.8		3.2		4.9		7.5		11.2			***		***		***	0			***	113.425		-6			***		***	0.0096		4	***		***	0.7
1981-12-22	2.6		11.7		-2.8		4.1		4.8		3.1		4.6		7.5		11.1			***		***		***	0			***	91.4346		7			***		***	0.0086		4	***		***	0.61
1981-12-23	2.9		13		-2.7		4.6		5.5		3.1		4.5		7.5		11			***		***		***	0			***	72.9162		-2			***		***	0.0049		4	***		***	0.54
1981-12-24	4	*	12.1	*	-2.2	*	5.1	*	6	*	2.6	*	3.8	*	6.5	*	9.6	*		***		***		***	0	*		***	86.805	*	0	*		***		***	0.0051	*	2	***		***	0.98
1981-12-25	1.5		5.2		-4.6		2.1		2.4		2.2		3.8		7.3		10.9			***		***		***	0			***	34.722		-9			***		***	0.0023		0	***		***	0.57	*
1981-12-26	1.7		11		-3.7		3.3		4.2		2.2		3.9		7.1		10.8			***		***		***	0			***	105.323		16			***		***	0.0096		0	***		***	0.57
1981-12-27	2.5		13.2		-4.4		4.5		5.5		2.4		3.9		7		10.7			***		***		***	0			***	99.5364		14			***		***	0.0092		0	***		***	0.55
1981-12-28	6.8		15.8		-1.4		7.3		7.8	*	3.7	*	4.3	*	6.6	*	10.2	*		***		***		***	0			***	101.851		11			***		***	0.0051		0	***		***	1.02
1981-12-29	9.1		15.4		2.7		9.7		10.1		6.1		5.9		6.9		10.5			***		***		***	0			***	91.4346		7			***		***	0.0053		0	***		***	1.08
1981-12-30	7.4		12		2.4		8.1		8.5		5.8		6.5		7.2		10.4			***		***		***	0			***	94.9068		11			***		***	0.0054		0	***		***	1.79
1981-12-31	3.8		5.2		3		3.9		3.7		5		6.2		7.4		10.3			***		***		***	1			***	12.7314		-1			***		***	0.0027		0	***		***	0.61
1982-01-01	4.3		11		-1.6		5		4.9		5.3		6.1		7.5		10.3			***		***		***	0			***	111.11		18			***		***	0.0137		4	***		***	0.69
1982-01-02	4.8		11.3		0		5.6		5.7		4.6		6.1		7.6		10.3			***		***		***	0			***	115.74		1			***		***	0.0103		4	***		***	0.85
1982-01-03	1.8		7.8		-5.8		2.9		3.4		2.7		5		7.6		10.3			***		***		***	0			***	121.527		9			***		***	0.0105		3	***		***	0.58
1982-01-04	5.6		8.5		2.3		5.5		5.3		5.8		5.7		7.5		10.3			***		***		***	8			***	46.296	***	19			***		***	0.0133	***	4	***		***	0.76
1982-01-05	9.9		15.8		6.2		10		9.9		8.9		7.9		7.5		10.1			***		***		***	17.5			***	106.481	***	29			***		***	0.0023	***	5	***		***	0.94
1982-01-06	4.8		7.6		-0.5		5.2		5.1		5.5		7.3		7.8		10			***		***		***	0			***	75.231		6			***		***	0.0033		4	***		***	1.11
1982-01-07	0.5		8.6		-5.4		1.5		2		2.5		5.4		7.9		10			***		***		***	0			***	120.37		7			***		***	0.0128		3	***		***	1.28
1982-01-08	-0.2		4.9		-6.3		0.4		0.5		1.8		4.3		7.7		10			***		***		***	0			***	115.74		7			***		***	0.0099		3	***		***	0.72
1982-01-09	1.9		9.9		-3.1		3.4		3.7		2.9		4.5		7.4		10			***		***		***	0			***	112.268		-2			***		***	0.0094		3	***		***	0.84
1982-01-10	4		10.7		-2.8		5.1		5.5		3.1		4.5		7.2		10			***		***		***	0			***	123.842		5			***		***	0.008		3	***		***	0.8
1982-01-11	4.2		6.3		1.8		4.4		4.5		4.2		5.1		7.1		10			***		***		***	0			***	46.296		9			***		***	0.0017		3	***		***	1.19
1982-01-12	6.1		13.2		0.8		6.6		7.1		5.3		5.5		7.1		10			***		***		***	0			***	78.7032		10			***		***	0.0086		4	***		***	0.7
1982-01-13	5.7		10.4		1.2		6.4		6.9		4.8		5.8		7.2		9.9			***		***		***	0			***	63.657		10			***		***	0.0019		3	***		***	1
1982-01-14	2.7		7.7		-2.9		3.9		4.4		4		5.7		7.3		9.9			***		***		***	0			***	67.1292		-4			***		***	0.0051		3	***		***	0.64
1982-01-15	1.5		8.7		-5.5		2.1		2.3		2.8		4.6		7.3		9.8			***		***		***	0			***	93.7494		-1			***		***	0.0058		3	***		***	0.98
1982-01-16	0.8		3		-0.4		0.9		0.6		3.1		4.6		7.2		9.8			***		***		***	0.5			***	60.1848		10			***		***	0.0058		3	***		***	1.13
1982-01-17	-0.3		5.8		-6		0.6		0.8		2.5		4.4		7		9.8			***		***		***	0			***	107.638		5			***		***	0.0078		3	***		***	0.72
1982-01-18	0.1		7.1		-7.3		0.6		0.9		2.6		4		6.9		9.7			***		***		***	1.5			***	108.796		21			***		***	-0.0058	***	3	***		***	0.45
1982-01-19	2		8.1		-3.2		2.4		2.7		2.5		4.3		6.8		9.7			***		***		***	0			***	126.157		0			***		***	-0.0012	***	3	***		***	1.45	***
1982-01-20	1.2		6.6		-3		1.6		1.8		1.1		3.6		6.7		9.7			***		***		***	0			***	135.416		-6			***		***	-0.0166	***	3	***		***	1.83	***
1982-01-21	1.4		10.5		-6.4		3.3		3.7		1.3		3.3		6.5		9.6			***		***		***	0			***	133.101		7			***		***	0.0077	***	3	***		***	0.79	***
1982-01-22	4.4		12.1		-4.5		5.4		6.6		2.7		3.7		6.4		9.6			***		***		***	0			***	118.055		14			***		***	0.0092	***	3	***		***	0.88	***
1982-01-23	6.3		12.1		0.4		6.4		6.3		4.5		5.3		6.3		9.5			***		***		***	0			***	99.5364		3			***		***	-0.0085	***	2	***		***	1.89	***
1982-01-24	3.8		10.8		-2.9		4.7		4.9		2.3		4.4		6.4		9.4			***		***		***	0			***	121.527		4			***		***	0.003	***	1	***		***	0.98	***
1982-01-25	2.9		10		-3.1		4.1		4.5		2.1		4.2		6.5		9.3			***		***		***	0			***	116.897		9			***		***	-0.0081	***	2	***		***	1.26	***
1982-01-26	2.5		8.4		-4.5		3.3		3.7		2.1		3.8		6.4		9.3			***		***		***	0			***	127.314		17			***		***	0.0134	***	3	***		***	0.99	***
1982-01-27	3.9		8		-1.6		4.5		4.6		3.5		4.8		6.3		9.3			***		***		***	0			***	89.1198		9			***		***	0.004	***	3	***		***	0.96	***
1982-01-28	2.6		8.6		-2.5		2.9		2.9		2.9		4.5		6.4		9.2			***		***		***	0			***	118.055		33			***		***	0.0152		3	***		***	0.92	***
1982-01-29	-0.2		4.3		-5.1		0.2		0.1		2.4		4.6		6.4		9.2			***		***		***	1			***	148.147		6			***		***	0.0135	*	2	***		***	2.2
1982-01-30	0.2		5.1		-5.6		0.7		0.6		1		3.4		6.4		9.1			***		***		***	0			***	142.36		-4			***		***	0.0183		2	***		***	1.71
1982-01-31	1.1		7.8		-6.9		1.9		2.1		1.8		3		6.2		9.1			***		***		***	0			***	138.888		16			***		***	0.015		2	***		***	0.75
1982-02-01	2		8.9		-3.8		2.8		3.1		2.4		3.5		6		9			***		***		***	0			***	128.471		6			***		***	0.0143		3	***		***	1.01
1982-02-02	-0.3		6.4		-6.7		1.1		1.5		1.4		3.1		5.9		9			***		***		***	0			***	150.462		6			***		***	0.0188		3	***		***	0.9
1982-02-03	-1.2		7.8		-8.2		1.2		2.1		1.1		2.7		5.9		8.9			***		***		***	0			***	124.999		11			***		***	0.0163		3	***		***	0.54
1982-02-04	2.5		9.4		-2.2		3		3.2		2.3		3		5.7		8.9			***		***		***	4.5			***	82.1754		23			***		***	0.004	***	3	***		***	1.13
1982-02-05	0.5		6.1		-4.6		1.1		1.3		3.2		3.8		5.7		8.8			***		***		***	1.5			***	160.879		22			***		***	0.041	***	4	***		***	1.17
1982-02-06	0.2		6.6		-7.9		1.5		1.9		1.8		3.4		5.7		8.8			***		***		***	0			***	115.74		3			***		***	0.0081		3	***		***	0.89
1982-02-07	0.9		3.9		-2.9		1.1		1		1.3		3.1		5.7		8.7			***		***		***	0			***	159.721		4			***		***	0.0197		3	***		***	2.28
1982-02-08	0.4		6.2		-5.1		1.1		1.2		1.4		2.8		5.6		8.6			***		***		***	0			***	156.249		16			***		***	0.0178		3	***		***	1.15
1982-02-09	-0.1		7		-9.1		0.7		1		1.5		2.7		5.5		8.6			***		***		***	0			***	159.721		22			***		***	0.0144		3	***		***	0.93
1982-02-10	1.1		7.7		-5.2		1.6		2		1.8		2.9		5.4		8.5			***		***		***	0			***	162.036		15			***		***	0.0168		3	***		***	1.25
1982-02-11	2.9		9.8		-4.8		3.8		4		1.9		2.9		5.4		8.5			***		***		***	0			***	166.666		19			***		***	0.0223		3	***		***	1.32
1982-02-12	3.6		8.5		-2.5		3.8		3.7		2.7		3.2		5.3		8.4			***		***		***	0			***	70.6014		14			***		***	0.0076		3	***		***	1.54
1982-02-13	4.1		6.5		1.9		4.1		3.9		3.5		4.1		5.3		8.4			***		***		***	0			***	81.018		11			***		***	0.0088		3	***		***	1.79
1982-02-14	1.9		8.6		-5.4		2.6		2.7		3.3		4		5.5		8.3			***		***		***	0			***	164.351		24			***		***	0.0186		3	***		***	0.77
1982-02-15	2.6		9.2		-3		3.2		3.2		3.7		4.2		5.6		8.3			***		***		***	0			***	172.453		33			***		***	0.0197		3	***		***	0.76
1982-02-16	4.9		12.2		-2.5		5.3		5.4		4.2		4.8		5.7		8.3			***		***		***	0			***	167.823		26			***		***	0.0176		3	***		***	1.05
1982-02-17	4.7		7.4		1.8		4.8		4.6		2.6		5.1		5.8		8.3			***		***		***	5			***	28.935		1			***		***	-0.0016	***	3	***		***	2.32
1982-02-18	4.1		10.1		-2.3		4.6		4.9		3.1		5		5.9		8.3			***		***		***	0			***	172.453		39			***		***	-0.0085	***	4	***		***	1.03
1982-02-19	6.6		11.6		1.9		6.6		6.4		4.6		5.8		6		8.3			***		***		***	0			***	77.5458		24			***		***	0.0065		4	***		***	1.06
1982-02-20	7.2		11.3		5.3		7.5		7.4		5.6		6.8		6.2		8.3			***		***		***	3			***	46.296		16			***		***	0.0065		4	***		***	0.59
1982-02-21	7.3		9.4		4.3		7.5		7.5		4.9		6.9		6.5		8.3			***		***		***	6.5			***	20.8332	***	4			***		***	-0.0006		4	***		***	1.5
1982-02-22	5.3		11.1		-1.1		5.8		6		5.6		7.2		6.7		8.3			***		***		***	0.5			***	166.666	***	33			***		***	0.0178		4	***		***	0.87
1982-02-23	3.6		11		-2.7		4.5		5.1		3.7		6		6.9		8.4			***		***		***	0			***	136.573		19			***		***	0.0112		4	***		***	1.14
1982-02-24	2.3		4		1.3		2.3		2		0.6		5.4		6.9		8.4			***		***		***	0			***	47.4534		12			***		***	0.0041		3	***		***	1.28
1982-02-25	3.5		7.8		0.6		3.6		3.5		3.1		5.5		6.9		8.5			***		***		***	0			***	163.193		22			***		***	0.0193		3	***		***	1.66
1982-02-26	1.4		7.3		-6		2.2		2.1		0.8		4.8		6.8		8.5			***		***		***	0			***	188.656		22			***		***	0.0207		3	***		***	1.15
1982-02-27	2.5		9.1		-4.7		3.5		3.9		1.5		4.3		6.6		8.6			***		***		***	0			***	138.888		21			***		***	0.012		3	***		***	0.67
1982-02-28	5.3		12.6		-2.9		6.1		6.3		3.7		5.3		6.5		8.6			***		***		***	0			***	134.258		27			***		***	0.0136		4	***		***	0.7
1982-03-01	5.2		6.4		3.1		5.3		5.2		4.3		6.2		6.5		8.6			***		***		***	12			***		***	17			***		***	0.0154		0	***		***	0.94
1982-03-02	3.1		9.1		-2		3.5		3.4		4.5		6.5		6.6		8.3			***		***		***	4			***	151.619	***	34			***		***	0.0126		0	***		***	0.75
1982-03-03	2.6		9.7		-4		4.1		4.4		3.4		6		6.7		8.3			***		***		***	0			***	202.545	*	53			***		***	0.019		0	***		***	0.73
1982-03-04	4.2		11.2		-3.8		4.8		5.1		4		6.1		6.7		8.3			***		***		***	0			***	168.98		38			***		***	0.0185		0	***		***	0.66
1982-03-05	8.9		13.7		4.7		9.4		9.7		5.7		7.1		6.8		8.4			***		***		***	1			***	45.1386		14			***		***	-0.0044	*	0	***		***	0.58
1982-03-06	6.6		8.9		2.8		7		7.1		5.2		7.4		7		8.4			***		***		***	5.5			***	27.7776		6			***		***	0.0003		0	***		***	1.31
1982-03-07	4.2		9		-0.6		4.5		4.5		4.8		7		7.2		8.4			***		***		***	0.5			***	153.934		46			***		***	0.013		0	***		***	1.14
1982-03-08	3.3		6.8		0		3.4		3.2		4.3		6.7		7.3		8.5			***		***		***	0			***	153.934		44			***		***	0.0157		0	***		***	1.1
1982-03-09		***		***		***		***		***		***		***		***		***		***		***		***		***		***		***	0	***		***		***	0	***	0	***		***	0.59
1982-03-10	5.4	***	12.1	***	0	***	5.8	***	6	***	4.5	***	4.9	***	4.6	***		***		***		***		***		***		***	168.98	***	48	***		***		***	0.0159	***	0	***		***	0.89	***
1982-03-11	7.7		17.6		-0.8		9.1		9.6		6.1		7.8		7.5		8.7			***		***		***	0			***	195.601		51			***		***	0.0172		0	***		***	0.88	***
1982-03-12	10.1		14.5		2.6		10.2		10.4		7.7		8.7		7.6		8.7			***		***		***	0			***	109.953		19			***		***	0.008		4	***		***	1.23
1982-03-13	10.3		15.8		6.4		10.4		10.5		8.9		10		7.9		8.7			***		***		***	6.5			***	181.712	***	41			***		***	0.0121		5	***		***	1.47
1982-03-14	7.5		11.2		3.7		7.5		7.5		6.8		9.2		8.3		8.8			***		***		***	0			***	208.332	*	52			***		***	0.0134		4	***		***	1.87
1982-03-15	9.5		14.5		6.2		9.5		9.3		7.5		9.1		8.5		8.9			***		***		***	0.5			***	40.509		12			***		***	0.0032		4	***		***	0.87
1982-03-16	13.5		21.8		8.7		13.6		13.6		11.3		11.3		8.6		9			***		***		***	2			***	163.193		49			***		***	-0.0007		5	***		***	1.09
1982-03-17	8.8		13.4		4.2		9.2		9.3		8.4		10.8		9		9.1			***		***		***	0.5			***	136.573		43			***		***	0.0124		4	***		***	1.94
1982-03-18	7.1		14.4		1.9		7.4		7.3		7.7		10.2		9.3		9.2			***		***		***	1			***	149.305		40			***		***	0.0088	***	4	***		***	0.67
1982-03-19		***	11.2			***	4.6		4.9	***	5	***	7.5	***	7.8	***	7.8	***		***		***		***	0			***	185.184	*	42			***		***	0.02		4	***		***	0.95	***
1982-03-20	7.3		8.8		5.7		7.4		7.2		6.7		9.1		9.3		9.4			***		***		***	1			***	27.7776		5			***		***	0.0008	***	2	***		***	0.4284
1982-03-21	9.7		12.4		7.2		9.8		9.8		7.5		9.6		9.3		9.5			***		***		***	17.5			***	41.6664		11			***		***	0.0041	***	1	***		***	1.1152	***
1982-03-22	11.1		17.5		5.6		11.5		11.5		8		10.3		9.3		9.5			***		***		***	0			***	231.48		54			***		***	0.0173		-3	***		***	1.53	***
1982-03-23	10.5		18		2.4		10.8		11		8.5		10.8		9.5		9.6			***		***		***	0			***	214.119		59			***		***	0.0098		5	***		***	1.37
1982-03-24	10.5		17.6		4.9		10.6		10.8		8.8		11.3		9.7		9.7			***		***		***	0			***	146.99		50			***		***	0.015		5	***		***	1.28
1982-03-25	6.6		11.2		1.8		6.7		6.4		6.2		10.5		10		9.8			***		***		***	0			***	207.175		57			***		***	0.0282		4	***		***	1.68
1982-03-26	5		11.1		-1.7		5.5		5.3		5.5		9.4		10		9.9			***		***		***	0			***	246.526		60			***		***	0.0279		4	***		***	1.59
1982-03-27	5.4		12.9		-1		5.5		5.4		6.2		9.6		9.8		9.9			***		***		***	0			***	230.323		50			***		***	0.0268		4	***		***	1.29
1982-03-28	6.4		11		2		6.4		6.3		5.9		9.8		9.7		10			***		***		***	0			***	226.85		53			***		***	0.0207		4	***		***	2.11
1982-03-29	6.1		13.5		-2.7		6.6		6.7		6.6		9.7		9.8		10.1			***		***		***	0			***	243.054		40			***		***	0.0292		5	***		***	0.96
1982-03-30	9.9		18.6		-1.3		10.7		10.9		8.5		10.5		9.8		10.1			***		***		***	1			***	222.221	***	38			***		***	0.0205		5	***		***	1.25
1982-03-31	12.1		16.8		6.8		12.9		13.1		8.1		10.9		9.9		10.2			***		***		***	5			***		***	6			***		***	0.0032		5	***		***	1.77
1982-04-01	9		16		2.5		9.6		9.8		8		10.9		10.1		10.2			***		***		***	0			***		***	71			***		***	0.0219		5	***		***	1.73
1982-04-02	8.4		11.3		5.4		8.2		7.9		6.9		10.3		10.2		10.2			***		***		***	0			***	53.2404	***	21			***		***	0.01		4	***		***	1.41
1982-04-03	12.3		21.9		5.8		12.3		12.2		10.1		11.6		10.3		10.3			***		***		***	3			***	77.5458	***	39			***		***		***	5	***		***	1.12
1982-04-04	6.3		10.7		-0.4		6.7		6.5		6.6		10.9		10.5		10.4			***		***		***	1.5			***		***	24			***		***		***	4	***		***	1.19
1982-04-05	6.4		14.1		-1.9		7.3		7.4		7.1		10.2		10.5		10.4			***		***		***	0			***		***	56			***		***	0.0699	***	5	***		***	1
1982-04-06	9.7		18		-0.3		10.6				9		11		10.4		10.5			***		***		***	0			***	202.545	***	67			***		***	0.0234		5	***		***	1.37
1982-04-07	12.5		14.6		9.7		12.5				10.2		12.1		10.5		10.6			***		***		***	3.5			***	69.444		27			***		***	0.0078		5	***		***	0.92
1982-04-08	12.9		13.8		9.8		12.9				10.7		12.9		10.8		10.6			***		***		***	2			***	40.509		18			***		***	0.0075		6	***		***	1.12
1982-04-09	13.4		19.3		10.1		13.5				11.2		13		11		10.7			***		***		***	1			***	113.425		41			***		***	0.0057		6	***		***	2.05
1982-04-10	9.1		13.4		5.1		9.1		8.8		8.1		11.9		11.3		10.7			***		***		***	0.5			***	172.453		43			***		***	0.0373		5	***		***	3.72
1982-04-11	8.3		17.1		-1		9.4		9.6		8.8		11.3		11.2		10.8			***		***		***	0			***	274.304		66			***		***	0.0297		5	***		***	1.17
1982-04-12	10.1		16.9			***	10.5		10.7		9.4		11.6		11.1		10.9			***		***		***	0			***	188.656		44			***		***	0.019		5	***		***	1.11
1982-04-13	13.2		16.7		9.9		13.6		13.6		10.3		12.3		11.1		11			***		***		***	0			***	92.592		23			***		***	0.0063		6	***		***	0.95
1982-04-14	14		18.1		8.7		14.1		14.3		11.9		13		11.3		11.1			***		***		***	4			***	129.629		45			***		***	0.007		6	***		***	1.39
1982-04-15	14.1		16.1		11.2		14.1		14		12.1		13.9		11.5		11.2			***		***		***	53	*		***	43.9812	*	18			***		***	0.004		6	***		***	2.1
1982-04-16	15.9		23.2		9.9		16.1		16.3		14.4		15		12		11.6			***		***		***	0			***	271.989		94			***		***	0.0226		7	***		***	1.5
1982-04-17	10.9	***		***		***		***		***		***		***		***		***		***		***		***		***		***		***	14	***		***		***	0.0058	***	2	***		***	0.49
1982-04-18	11.2	***		***		***		***		***		***		***		***		***		***		***		***		***		***		***	0	***		***		***	0	***	0	***		***	1.4788	***
1982-04-19	10.8	***	19	***		***	8.2	***	8.2	***		***		***		***		***		***		***		***		***		***		***	41	***		***		***	0.0189	***	4	***		***	0.62	***
1982-04-20	13.3		21.4		3.4		14.3		14.6		12.9		14.5		12.6		11.8		2.1		2.4		2.7		0			***	260.415		83			***		***	0.0207		6	***		***	1.69	***
1982-04-21	13		15.7		10.1		13.2		13.3		11.4		14.3		12.7		11.8		4.2		4.6		4.9		1.5			***	119.212		37			***		***	0.0062		6	***		***	2.47
1982-04-22	9.6		13.2		4.2		9.8		9.8		9.3		12.9		12.8		11.9		3.7		4		4.3		18			***	115.74		37			***		***	0.0128		6	***		***	2.03
1982-04-23	10.3		17.4		1.4		10.6		10.7		11		12.9		12.6		12		3.2		3.2		3.1		0			***	277.776		105			***		***	0.0239		6	***		***	1.56
1982-04-24	14.5		19.9		10.1		14.5		14.4		13.6		14.6		12.6		12.1		7.6		7.8		7.6		0			***	162.036		56			***		***	0.0196		7	***		***	1.04
1982-04-25	16.3		23.1		9.7		16.7		16.7		15.2		15.9		12.8		12.1		8.8		8.9		8.7		0			***	244.211		78			***		***	0.0211		8	***		***	1.16
1982-04-26	16.9		24.1		11.8		17		17		16		16.9		13.2		12.1		8.9		9		8.9		0			***	246.526		81			***		***	0.0214		8	***		***	1.25
1982-04-27	13.4		17.9		10.3		13.5		13.4		13.4		16.3		13.6		12.2		5.2		5.7		5.6		0			***	239.582		92			***		***	0.0118		7	***		***	2.84
1982-04-28	12.1		13.4		11.1		12		11.7		11.5		14.7		13.9		12.3		7.4		7.8		7.4		0			***	33.5646		11			***		***	0.0028		6	***		***	1.67
1982-04-29	16		19.1		12.3		16		15.7		13.7		15		13.8		12.5		10.5		10.7		10.5		0			***	75.231		30			***		***	0.0048		6	***		***	1.24
1982-04-30	18.8		24.8		14.3		18.7		18.6		17.5		17.3		13.8		12.5		12.9		13.1		13		0.5			***	204.86		94			***		***	0.0147		7	***		***	1.95
1982-05-01	19.7		23.4		17.5		19.7		19.7		17.7		18.3		14.2		12.7		15		15.1		15.2		4.5			***	122.684		52			***		***	0.0084	***	8	***		***	1.78
1982-05-02	20.2		23.8		16.9		20.1		20		17.6		18.3		14.6		12.8		15.9		16		15.9		0			***	106.481		40			***		***	0.0049		9	***		***	1.31
1982-05-03	21.6		25.8		18.8		21.5		21.3		19.6		19.6		15		12.9		17.5		17.5		17.6		8.5			***	129.629		65			***		***	0.0069		10	***		***	1.87
1982-05-04	21.7		27.5		14.7		21.6		21.6		19.6		20.6		15.4		13		13.2		13.3		13.6		1			***	239.582		101			***		***	0.0124	*	10	***		***	2.86
1982-05-05	17.4		24.1		11.5		17.5		17.6		17.7		19.5		15.9		13.2		6.8		7.1		7.3		0			***	265.045		82			***		***	0.0242		9	***		***	1.18
1982-05-06	17.5		23.9		9.4		17.8		17.9		16.8		18.7		16.2		13.4		9.6		9.7		9.5		0			***	177.082		61			***		***	0.0174		9	***		***	1.74
1982-05-07	17.5		21		15.4		17.7		17.6		17		18.8		16.3		13.6		14.1		14.2		14		16.5			***	105.323		45			***		***	0.0114		10	***		***	0.93
1982-05-08	19.9		26.6		14.3		20				15.9		19.5		16.3		13.8		13		13.1		12.9		0			***	265.045		114			***		***	0.0192		11	***		***	1.1
1982-05-09	20.5		26.3		16.2		20.6				15.5		20.5		16.5		13.9		14.2		14.3		14.1		0			***	215.276		83			***		***	0.0212		11	***		***	0.87
1982-05-10	20.4		26.3		14.4		20.7				15.8		20.5		16.9		14.1		14.5		14.7		14.4		0			***	210.647		80			***		***	0.0149		10	***		***	1.12
1982-05-11	21.1		26.7		16.6		21.1				16.8		21.2		17.1		14.2		16.3		16.1		16.2		0			***	240.739		97			***		***		***	9	***		***	1.18
1982-05-12	22.2		28.1		18.1		22.2				17.7		21.8		17.5		14.4		16.8		16.6		16.9		0			***	212.962		87			***		***		***	10	***		***	1.15
1982-05-13	21.9		25.7		17.6		22.3				20.5		22.1		17.8		14.6		15.6		15.6		15.9		0			***	246.526		100			***		***		***	9	***		***	1.68
1982-05-14	18.8		27.4		10.7		19.1		18.9		20.5		21.3		18.1		14.8		13.1		13.6		14		15			***	82.1754		22			***		***	0.0438	***	8	***		***	2.12
1982-05-15	14.5		19.6		9.4		14.9		14.8		18.4		19.3		18.2		15		2.9		3.3		4.3		0			***	265.045		97			***		***	0.0245		9	***		***	0.87
1982-05-16	15.2		22		6.8		15.8		16.2		18.3		18.8		18		15.1		6.3		6.8		7		0			***	265.045		96			***		***	0.0243		9	***		***	0.91
1982-05-17	18.3		24.6		11.8		18.7		18.8		20.1		19.8		17.9		15.3		9.6		9.8		10.3		0			***	283.563		99			***		***	0.0244		9	***		***	0.99
1982-05-18	19.4		25.9		12.3		20		20.2		20.3		20.2		17.9		15.4		11.6		11.7		11.8		0			***	231.48		93			***		***	0.0174		9	***		***	0.93
1982-05-19	17.2		20.7		14.7		17.1		17		19.9		20.5		18		15.5		8		8.6		8.9		0			***	271.989		102			***		***	0.013		8	***		***	2.42
1982-05-20	14.6		17.1		12.1		14.6		14.5		17.3		18.7		18.2		15.6		11.3		11.5		11.6		27.5			***	54.3978	***	18			***		***	0.0121	***	8	***		***	1.13
1982-05-21	16.9		23.2		10.4		17.5		17.6		19.4		19.2		18		15.9		7.2		7.5		7.9		0			***	273.146		109			***		***	0.0255		10	***		***	1.18
1982-05-22	16.3		22.7		8.9		16.9		16.9		18.9		19.3		17.9		15.9		4.3		4.8		5.6		0			***	295.137		101			***		***	0.0268		9	***		***	1.08
1982-05-23	15.7		23.3		6.8		16.4		16.7		19		19.2		17.8		15.9		4.3		4.8		5.6		0			***	311.341		102			***		***	0.0275		9	***		***	0.93
1982-05-24	18.9		25.8		11.6		19.1		19.2		20.8		20.2		17.8		16		9.5		9.6		10.1		0			***	284.72		96			***		***		***	9	***		***	1.4
1982-05-25	20.1		25.6		14.8		20.2		20.1		21.9		21.1		18		16		12		12.1		12.4		0			***	276.619		100			***		***	0.0416	***	9	***		***	1.58
1982-05-26	20.2		26		14.1		20.5		20.4		22.4		21.6		18.2		16		12.8		12.8		13.1		0			***	275.461		107			***		***	0.0143		8	***		***	1.39
1982-05-27	21.9		27.2		16.6		22		21.9		23.3		22.3		18.5		16.1		13.9		13.8		14.3		0			***	256.943		98			***		***	0.0187		8	***		***	1.03
1982-05-28	22.1		27.8		16.3		22.5		22.4		23.6		22.6		18.8		16.2		15.9		15.9		15.9		0			***	247.684		101			***		***	0.0114		8	***		***	1.23
1982-05-29	22.7		29		17		23.1		23.1		24.4		23.2		19.1		16.2		16		16.1		16.3		0			***	253.471		103			***		***	0.0159		8	***		***	1.17
1982-05-30	21		26.6		17.7		21.1		21.1		23.3		23.1		19.4		16.4		12.9		13.3		13.6		0			***	208.332		85			***		***	0.0126		7	***		***	1.99
1982-05-31	17.2		19.3		14.7		17.2		17		19.5		21		19.6		16.5		11.8		12.2		12.1		2.5			***	46.296		17			***		***	0.0051		2	***		***	2.07
1982-06-01	17.1		19.4		14.6		17		16.7		18.8		19.6		19.4		16.6		14.3		14.5		14.4		22			***	53.2404		26			***		***	0.0189		10	***		***	0.7
1982-06-02	17.1		19.4		15.1		17.2		17.2		18.8		19.6		19.1		16.8		13.5		14.2		14		0			***	65.9718		35			***		***	0.0037		10	***		***	1.86
1982-06-03	17.6		24.4		14.2		17.9		18		18.1		18.7		18.9		17.1		14.5		15.2		15.3		31			***	34.722		21			***		***	-0.0031		9	***		***	2
1982-06-04	16.1		18		14.8		16.3		16.1		17.5		18.4		18.7		17.8		12.7		13.2		13.5		7			***	56.7126		25			***		***	0.0026		5	***		***	0.74
1982-06-05	20.3		26.3		16		20.3		20.2		20.6		19.8		18.5		17.6		14.2		14.6		15.1		0			***	237.267		114			***		***	0.0173		7	***		***	0.91
1982-06-06	20.1		24.2		16.5		20.2		20.3		20.5		20.5		18.6		17.5		14.2		14.6		15		0			***	204.86		86			***		***	0.0076		7	***		***	1.41
1982-06-07	20		23.3		16.4		20.1		20		20.6		20.4		18.8		17.4		15.9		16		16.1		0			***	105.323		38			***		***	0.0076		7	***		***	0.61
1982-06-08	22.1		28.2		17.5		22.4		22.4		22.5		21.7		19		17.3		14.4		14.9		15.2		0			***	256.943		115			***		***	0.0133		9	***		***	1.24
1982-06-09	20.7		26.7		16		21		21		22.6		22.2		19.2		17.3		14.3		14.9		15		1.5			***	225.693		94			***		***	0.0145		8	***		***	1.02
1982-06-10	20.5		26		14.2		20.7		20.7		22.7		22.3		19.4		17.3		14.9		15.2		15.1		0			***	259.258		112			***		***	0.0192		8	***		***	1.07
1982-06-11	22.5		27.7		18.8		22.4		22.3		23.5		22.8		19.6		17.4		16.7		16.9		17		0			***	212.962		96			***		***	0.0208		8	***		***	0.87
1982-06-12	22.8		28.5		17.4		23.4		23.4		23.8		23.4		19.9		17.4		14		14.3		14.5		0			***	265.045		108			***		***	0.0156		8	***		***	0.95
1982-06-13	21.4		27.5		16.5		22.1		22.3		22.5		22.7		20.1		17.5		13.4		13.9		13.9		0			***	174.767		72			***		***	0.0081		8	***		***	1.51
1982-06-14	15.9		18.6		15		16		15.8		18.7		20.6		20.2		17.6		12.4		13.2		13.2		26			***	52.083		25			***		***	-0.0101	***	9	***		***	1.49
1982-06-15	19.3		24.9		14.9		19.7		19.6		21.8		21.1		19.9		17.7		9.6		10.1		10.7		0.5			***	312.498		133			***		***		***	12	***		***	0.72
1982-06-16	20.1		26.6		12.6		20.9		21		21.5		21.4		19.8		17.8		12		12.4		12.4		0			***	274.304		111			***		***	0.0134		11	***		***	1.55
1982-06-17	20.3		25.4		16.6		20.5		20.4		20.6		21		19.9		17.9		14.6		14.8		15.1		0			***	187.499		72			***		***	0.007		11	***		***	1.1
1982-06-18	20		23.5		17.2		20		19.9		20.8		21.1		19.9		17.9		14		14		14.6		0			***	150.462		62			***		***	0.0052		4	***		***	1.45
1982-06-19	20.8		24.7		16.3		20.8		20.6		22.8		21.8		19.9		17.9		16.3		16		16.5		10.5			***	199.073		95			***		***	0.0192		5	*		***	0.99
1982-06-20	21.3		26.5		17.4		21.3		21.2		23.4		22.7		20		18		17		16.9		17.6		43.5			***	200.23		100			***		***	0.021		5			***	0.91
1982-06-21	20.6		25		18.1		20.6		20.5		22.3		22.4		20.3		19.1		16.4		16.3		17.2		2.5			***	192.128		92			***		***	0.0111		1			***	1.32
1982-06-22	19.6		24.3		15.4		19.9		19.8		22.6		22.7		20.5		19		13.1		13		13.9		0			***	299.767		127			***		***	0.0168		0			***	1.48
1982-06-23	18.6		22.4		15.6		18.6		18.4		20.7		21.4		20.6		18.9		14.3		14.2		14.7		0.5			***	107.638		40			***		***	0.009		-2			***	0.83
1982-06-24	17		17.8		15.6		17.2		17.1		19.1		20.4		20.5		18.8		12.9		13.6		14.1		6			***	69.444		36			***		***	0.0064		-7			***	2.04
1982-06-25	19.9		24.6		17.6		20		20		21.4		21.1		20.2		18.8		13.3		13.1		13.8		0			***	148.147		75			***		***	0.0107		3			***	1.4
1982-06-26	17.3		18.2		15.5		17.5		17.3		18.5		20		20.1		18.7		12.4		12.4		12.8		3			***	35.8794		9			***		***	0.0001		-8			***	1.74
1982-06-27	18.1		25.8		13.9		18.8		18.8		18.7		19.1		19.8		19.1		10.2		10.8		11.9		29.5			***	209.489		102			***		***	0.0226		2			***	1.74
1982-06-28	19.7		25.7		14.8		19.8		19.7		22.3		21.2		19.6		19.2		12.6		12.8		13.8		4			***		***	120			***		***	0.0161		7			***	1.13
1982-06-29	20.2		25.6		15.3		20.3		20.1		22.7		22.1		19.7		19		11.2		11.3		12.2		0			***	297.452		138			***		***	0.0215		4			***	1.12
1982-06-30	17.3		20.2		15.2		17.3		17.2		19.5		20.9		20		18.9		9.8		10.1		10.6		0			***	185.184		83			***		***	0.0099		-6			***	1.82
1982-07-01	18		23.4		14.8		18.2		17.8		20.9		21		20		18.8		10.6		10.7		11.3		0			***		***	121			***		***	0.0151		1			***	1.69
1982-07-02	17.7		21.4		15.2		18		17.6		20		20.7		19.9		18.7		11.2		11.2		11.8		0			***	167.823		67			***		***	0.0111		-3			***	1.34
1982-07-03	18.7		23.8		13.4		19.2		18.8		22.1		21.3		19.8		18.7		11.7		11.7		12.4		0			***	261.572		105			***		***	0.0183		3			***	1.35
1982-07-04	17.8		20.9		12.3		18.5		18.2		20		20.6		19.8		18.7		13.8		13.7		13.8		0			***	111.11		50			***		***	0.009		-2			***	1.21
1982-07-05	21.7		26.4		16.8		22.4		22		23.5		22		19.8		18.6		15.8		15.5		16.1		0			***	207.175		91			***		***	0.0172		7			***	0.79
1982-07-06	21.1		25.4		16.1		22.2		21.8		22.6		22		19.9		18.6		16		15.6		16		0			***	157.406		68			***		***	0.0091		3			***	0.92
1982-07-07	19.7		21.9		17.7		20.2		19.8		21.3		21.7		20		18.6		17		17		17.6		22.5			***	60.1848		28			***		***	0.0043		-2			***	1.22
1982-07-08	20.5		24.9		15.7		20.9		20.6		22.7		21.9		20.1		18.6		15.5		15.1		15.8		0			***	226.85		112			***		***	0.0182		5			***	1.1
1982-07-09	22.3		27		18.7		22.7		22.2		24.2		23		20.2		18.6		16.5		16.1		17		0			***	193.286		92			***		***	0.0182		7			***	0.69
1982-07-10	23.9		28.9		18.8		24.4		23.9		25.1		23.8		20.4		18.6		18.2		17.7		18.3		0			***	233.795		115			***		***	0.0223		7			***	0.75
1982-07-11	24.1		28.6		20.1		24.6		24		24.6		24		20.7		18.6		19.2		18.8		19.4		0			***	185.184		89			***		***	0.0129		4			***	1.38
1982-07-12	26		30.2		22.9		26.9		26.3		25.9		24.6		20.9		18.7		20.9		20.8		21.7		0.5			***	162.036		79			***		***	0.0156		6			***	1.22
1982-07-13	22.6		27.1		18		24		23.8		23.9		24.1		21.2		18.7		15.9		15.9		17		0			***	122.684		42			***		***	0.0041		-3			***	0.76
1982-07-14	21.6		27.3		16.5		22.4		22.1		24.3		23.8		21.3		18.8		14.2		14.3		15.1		0			***	196.758		81			***		***	0.0085		0			***	1.17
1982-07-15	21		25.4		18.4		21.3		20.9		23		23.4		21.3		18.9		15		15.3		15.8		0.5			***	245.369		113			***		***	0.0079		0			***	1.88
1982-07-16	20.1		22.6		18		20.5		20		22.1		22.6		21.3		19		15		14.9		15.3		0			***	107.638		43			***		***	0.0043		-1			***	0.99
1982-07-17	20.6		23.5		18.6		20.9		20.4		21.8		22.1		21.2		19.1		18.3		18.3		18.7		18.5			***	56.7126		29			***		***	0.0132	***	0			***	0.94
1982-07-18	23.4		28.4		18.8		23.9		23.4		24.5		23.4		21.1		19.1		19.1		18.7		19.3		0			***	192.128		96			***		***	0.0135		7			***	0.93
1982-07-19	21.9		23.6		20.8		22.3		21.7		23		23.2		21.2		19.1		19.2		19.1		19.5		4.5			***	59.0274		26			***		***	0.0079	***	-1			***	1.12
1982-07-20	22.6		27.2		20.6		23		22.5		24		23.5		21.3		19.2		18.7		18.5		19.2		1			***	136.573		69			***		***	0.0071	*	3			***	1.06
1982-07-21	21.1		22.8		19.9		21.4		21		22.1		22.7		21.4		19.2		17.1		17.1		17.5		0			***	67.1292		28			***		***	0.0017		-3			***	1.41
1982-07-22	21.8		26.5		18.5		22.2		21.8		23.6		23.2		21.3		19.3		16.9		16.8		17.5		1			***	211.804		99			***		***	0.0141		3			***	1.08
1982-07-23	22.1		27		17.3		22.6		22.2		23.4		23.3		21.3		19.3		16.4		16.3		16.9		0			***	218.749		100			***		***	0.0121		3			***	1.1
1982-07-24	22.6		26.9		20		23.1		22.6		24		23.6		21.4		19.3		17.6		17.5		18		1.5			***	166.666		75			***		***	0.006		2			***	1.31
1982-07-25	20.6		21.6		20.1		21		20.5		22.2		22.8		21.5		19.4		18		18.1		18.7		11			***	48.6108		24			***		***	0.0089	*	-2			***	1.08
1982-07-26	20.9		21.7		20.3		21.2		20.7		21.8		22.2		21.5		20		18.1		18.2		18.8		35.5			***	60.1848		33			***		***	0.0121	***	-1			***	1.78
1982-07-27	21.4		23.4		19.6		21.7		21.2		22.3		22.4		21.4		20.3		17		16.8		17.3		0			***	106.481		55			***		***	0.0074		0			***	1.49
1982-07-28	21.6		25.2		18.7		21.9		21.4		22.8		22.5		21.4		20.2		17.4		17.1		17.6		0			***	119.212		59			***		***	0.0112		2			***	0.91
1982-07-29	21.5		24.3		20.1		21.8		21.3		22.5		22.6		21.4		20.1		18.2		18.3		18.8		1			***	87.9624		44			***		***	0.0034		1			***	1.29
1982-07-30	22.2		24.9		20.1		22.5		21.9		22.8		22.7		21.4		20		19.8		19.7		20.2		20.5			***	63.657		31			***		***	0.0028		2			***	0.93
1982-07-31	23.5		27.2		21.7		23.9		23.4		24.2		23.6		21.4		20.5		20.5		20.4		21.1		2.5			***	168.98		91			***		***	0.0101		4			***	1.57
1982-08-01	23.1		25.1		21.3		23.9		23.4		23		23.3		21.6		20.5		20.6		20.8		21.4		25			***	39.3516		20			***		***	-0.0073		1			***	1.72
1982-08-02	27		30.4		24.9		27.8		27.1		25.6		24.8		21.8		21.1		21		20.9		21.5		16			***	246.526		120			***		***	-0.008		7			***		***
1982-08-03	24.5		25.1		24.1		25.4		25		24.1		24.5		22.1		21		21.9		21.8		22.2		23.5			***	37.0368		21			***		***	-0.0064		1			***	1.12
1982-08-04	26.4		31.9		22.7		26.8		26.3		26.6		25.8		22.3		21.2		20.9		20.7		21.2		0			***	241.897		138			***		***	0.0245		7			***	1.15
1982-08-05	25		29.7		21.4		25.6		25.2		25.9		25.9		22.6		21		18.8		18.7		19.1		0			***	222.221		115			***		***	0.0184		2			***	0.73
1982-08-06	24.7		30.4		19.8		25.5		25.2		25.8		25.7		22.8		20.9		19.3		19.3		19.5		0			***	221.063		105			***		***	0.0176		2			***	0.88
1982-08-07	23.4		26.9		21.5		23.9		23.5		24.3		25		22.9		20.8		19.2		19.4		19.5		5.5			***	146.99		76			***		***	0.0057		-1			***	1.45
1982-08-08	24.2		27.9		21.7		24.7		24.1		24.7		24.8		22.9		20.8		21.4		21.4		21.6		1			***	114.583		60			***		***	0.0096		3			***	0.75
1982-08-09	25.4		29.8		23.1		26		25.5		25.9		25.7		22.9		20.8		20.9		20.7		20.8		0			***	192.128		99			***		***	0.0115		4			***	0.86
1982-08-10	25.5		30.8		21.1		26.2		25.8		26.3		26		23		20.8		20.6		20.5		20.5		0			***	219.906		115			***		***	0.0051	*	2			***	0.96
1982-08-11	25.7		31.7		21.1		26.4		26		26.7		26.3		23.2		20.8		19.8		19.9		20.1		0			***	225.693		116			***		***	-0.0334	***	1			***	1.25
1982-08-12	23.2		25.8		21		23.6		23.2		24.6		25.3		23.3		20.8		18.6		18.9		19		0			***	149.305		82			***		***	0.0115		-4			***	1.93
1982-08-13	23.7		27.8		20.3		23.9		23.4		24.8		24.9		23.3		20.8		19.1		19		19.1		0			***	162.036		88			***		***	0.0163		1			***	0.99
1982-08-14	25.9		31.9		21		26.7		26.3		26.6		25.9		23.2		20.9		21.1		20.8		20.9		0			***	207.175		112			***		***	-0.0269	***	4			***	0.73
1982-08-15	25.2		29.7		22.2		26.1		25.6		25.9		25.9		23.3		20.9		21.3		21.1		21.1		0			***	119.212		55			***		***	0.0096		0			***	0.55
1982-08-16	23.5		25.6		21.8		24.1		23.7		24.4		25		23.3		20.9		20		20.2		20.2		0.5			***	61.3422		24			***		***	-0.0017		-2			***	0.8
1982-08-17	24.8		28.1		22.4		25.4		25		25.4		25.2		23.3		21		21.2		21.5		21.9		6			***	120.37		67			***		***	-0.0313	***	2			***	1.35
1982-08-18	25.8		29.9		23.3		26.3		25.9		25.8		25.7		23.3		21		21		21.1		21.4		0			***	175.925		91			***		***	-0.0259	***	3			***	1.25
1982-08-19	25.8		29.4		22.3		26.3		25.8		26.6		26		23.3		21		21.4		21.3		21.4		0			***		***	87			***		***	-0.0237	***	3			***	0.94
1982-08-20	26.4		30.8		23.1		27		26.4		27.1		26.5		23.4		21.1		21.7		21.6		21.8		0			***	181.712		90			***		***		***	3			***	1.09
1982-08-21	26.4		30.9		23.4		26.9		26.3		26.7		26.4		23.6		21.1		22.1		21.9		22		0			***	163.193		83			***		***	-0.0268	***	3			***	0.88
1982-08-22	27.1		32.4		23		27.8		27.3		27.9		27.2		23.7		21.1		22.3		22.1		22.3		0			***	222.221		113			***		***		***	4			***	1.17
1982-08-23	25.8		30.7		22.3		26.4		26		27.2		27		23.9		21.2		21.4		21.6		21.7		0			***	211.804		109			***		***	-0.0264	***	-1			***	1.38
1982-08-24	27.1		32.3		23.1		27.6		27.1		28.3		27.4		23.9		21.2		21.5		21.4		21.7		0			***	234.952		113			***		***	-0.0104	***	4			***	1.24
1982-08-25	26.7		31.9		23.7		27.2		26.7		27.5		27.1		24		21.3		21.9		21.9		22		0			***	165.508		83			***		***	-0.0001	***	4			***	0.93
1982-08-26	24.5		28.8		23		24.9		24.4		25.6		26.3		24.1		21.4		21.1		21.6		21.8		7			***	105.323	*	56			***		***	-0.0033	***	-1			***	1.54
1982-08-27	26.4		31.1		22.9		27.2		26.7		25.4		26.1		24.1		21.4		21.2		21.4		21.8		3.5			***	200.23	*	107			***		***		***	4			***	1.79
1982-08-28	27.6		31.7		24.4		28.3		28		26.8		26.9		24.1		21.5		22.5		22.4		22.9		1.5			***	212.962		112			***		***	-0.021	***	4			***	1.67
1982-08-29	27.4		31.9		24		28		27.6		27.4		27.4		24.1		21.5		22.6		22.5		22.8		0			***	215.276		108			***		***	-0.011	***	3			***	1.21
1982-08-30	25		26.9		23.3		25.7		25.4		25.3		26.5		24.3		21.6		22.1		22.1		22.2		0.5			***	67.1292		26			***		***	-0.0002	***	-2			***	0.65
1982-08-31	25.6		30.2		22.8		26.1		25.7		25.9		26.4		24.3		21.6		20.6		20.5		20.9		5			***	185.184		96			***		***	-0.0168	***	0			***	0.92
1982-09-01	25.3		29.9		21.2		25.8		25.4		25.5		26.3		24.2		21.6		18.9		18.9		19.2		0			***	251.156		122			***		***	-0.008	***	-2			***	1.14
1982-09-02	24.1		28.5		19		24.9		24.6		25.1		25.9		24.1		21.7		19.6		19.5		19.5		0			***	225.693		110			***		***	-0.0083	***	-2			***	1.08
1982-09-03	23.5		28.7		20.3		24		23.6		25.1		25.8		23.9		21.7		18.5		18.4		18.5		0			***	142.36		69			***		***	-0.0037	***	-3			***	1.1
1982-09-04	19.6		22.6		16.9		20		19.6		20.7		23.5		23.8		21.8		13.1		13.5		13.6		11			***	101.851		31			***		***	-0.0212	***	-11			***	2.23
1982-09-05	19.8		25.8		15.1		20.5		20.2		21.1		22.7		23.4		21.8		10.1		10.2		10.7		0			***	256.943		99			***		***		***	-4			***	1.43
1982-09-06	19.4		21.5		17.5		19.8		19.1		20.3		21.9		22.9		21.7		14.3		14.2		14.4		0.5			***	69.444		32			***		***	-0.009	***	-4			***	0.7
1982-09-07		***		***	18.6	*	21.6		20.6		22		22.5		22.6		21.7		17.8		17.5		17.9		0			***	105.323		56			***		***	-0.011	***	2			***	0.61
1982-09-08	22.1		24.7		20.6		22.4		21.5		22.4		23		22.5		21.6		18		17.9		18.2		0.5			***	100.694		53			***		***	-0.0168	***	0			***	0.83
1982-09-09	22.6		27.1		20		23.1		22.3		22.5		23.1		22.5		21.5		18.6		18.7		19		0			***	158.564		81			***		***	-0.0115	***	1			***	1.5
1982-09-10	23		26.9		20.4		23.5		22.8		22.9		23.5		22.5		21.5		20.2		20		20.3		37			***	46.296		17			***		***	0.0017	***	0			***	1.02
1982-09-11	20.2		21.7		18.8		20.6		20.2		21.1		22.5		22.6		21.5		17.6		17.8		18		21			***	40.509		19			***		***	0.0047	***	-4			***	1.07
1982-09-12	20.5		24.6		18.3		21.1		20.7		19.8		21.1		22.3		21.8		16.6		16.9		17.3		133.5			***	19.6758		6			***		***		***	-3			***	2.47
1982-09-13	23.4		28.1		17.7		24.4		24.1		21.9		22.2		21.8		21.6		13		13		13.9		0			***	238.424		108			***		***		***	0			***	1.46
1982-09-14	20.5		25.9		14.4		21.3		21.1		20.7		21.9		21.7		21.6		13.1		13.2		13.4		0			***	221.063		96			***		***	-0.011	***	-4			***	1.14
1982-09-15	17.2		19.1		15		18		17.8		18.3		20.6		21.6		21.6		13		13.2		13.1		6			***	34.722		1			***		***	0	***	-8			***	0.89
1982-09-16	18.5		22.5		14.3		18.9		18.5		19.2		20.3		21.4		21.5		13.1		12.9		13.1		0.5			***	113.425		43			***		***	0	***	-2			***	0.63
1982-09-17	19.7		24.3		16.7		20.2		19.8		19.6		20.7		21.2		21.4		14.4		14.3		14.4		0			***	144.675		60			***		***	0	***	-1			***	0.83
1982-09-18	19		23.6		14.8		19.7		19.4		19.7		20.9		21.1		21.3		13.7		13.5		13.5		0			***	165.508		66			***		***	0	***	-3			***	0.78
1982-09-19	17.9		20.4		15.5		18.5		18.2		18.7		20.2		21		21.1		13.5		13.3		13.6		1			***	69.444		24			***		***	0	***	-3			***	0.45
1982-09-20	18		20		15.6		18.3		17.7		18.7		20		20.8		21.1		15.3		15.2		15.5		21			***	54.3978		26			***		***	0	***	-1			***	0.54
1982-09-21	21.3		27.4		16.4		22		21.5		20.7		21		20.7		21		17.3		17.1		17.4		0.5			***	114.583		47			***		***	0	***	2			***	0.56
1982-09-22	18.7		24.3		13.2		19.7		19.6		19.3		20.8		20.7		20.9		10.8		11.1		11.5		0			***	184.027		78			***		***	0	***	-5			***	0.69
1982-09-23	17.7	***	18.5	***		***		***		***		***		***		***		***	8.6	***	8.4	***	8.6	***		***		***	4.6296	***	-4	***		***		***	0	***	-4	***		***	0.53
1982-09-24	18.5	***	19.6	***		***		***		***		***		***		***		***	8.8	***	8.9	***	9	***	9.5	***		***		***	-3	***		***		***	0	***	-3	***		***	0.79	***
1982-09-25	21		23.6		18.9		21.5		21.1		19.8		20.3		20.3		20.6		18.3		18.6		18.4		38			***	32.4072		12			***		***	0	***	2			***	1.59	***
1982-09-26	24.6	***	27.1	***		***		***		***		***		***		***		***	13.5	***	13.3	***	13.3	***		***		***		***	-13	***		***		***	0	***	0	***		***	1.2
1982-09-27	23.4		29.3		18.3		24.5		24.3		22.1		22.5		20.5		20.4		16.8		16.8		16.9		0			***	187.499		77			***		***	0	***	0			***	0.7	***
1982-09-28	20		21.5		18.3		20.6		20.3		19.8		21.4		20.7		20.4		13.7		14.2		13.9		0			***	67.1292		25			***		***	0	***	-5			***	1.1
1982-09-29	19.1		22.9		14.6		19.7		19.4		19.2		20.6		20.7		20.4		12.2		12.8		12.6		0			***	111.11		44			***		***	0	***	-4			***	0.64
1982-09-30	17.7		20.8		14.2		18.5		18.2		18.6		20		20.6		20.3		13		13.4		13.1		0			***	62.4996		17			***		***	0	***	-5			***	0.33
1982-10-01	18		23.9		13.8		18.9		18.8		17.9		19.6		20.4		20.3		12.5		12.7		12.4		0			***	137.731		55			***		***	0	***	-5			***	0.53
1982-10-02	16.4		22.1		12.4		17.1	*	17		16.9		18.8		20.2		20.3		12.9		12.9		12.7		25			***	72.9162		35			***		***	0	***	-5			***	0.8
1982-10-03	17.5		22.6		13.6		18.1		17.9	*	18.1		19.1		19.9		20.3		10.9		11		11.4		0.5			***	157.406		70			***		***	0	***	-3			***	0.82
1982-10-04	17.6		24.2		11.2		18.2		18.2		17.6		18.9		19.7		20.2		11.4		11.2		11.4		0			***	193.286		82			***		***	0	***	-3			***	0.75
1982-10-05	18.8		22.8		15.1		19.3		19		18.6		19.4		19.5		20.1		13.6		13.5		13.8		0			***	122.684		49			***		***	0	***	0			***	0.78
1982-10-06	16.7		18.3		15.5		17.2	*	16.9	*	17.4		19		19.5		20		13.6		13.6		13.9		4			***	24.3054		0			***		***	0	***	-5			***	0.57
1982-10-07	17		19.5		14.7		17.4	*	16.9	*	17.4		18.6		19.4		19.9		12.4		12.2		12.5		0.5			***	60.1848		27			***		***	0	***	-3			***	0.78
1982-10-08	16.4		17.2		15.6		16.8		16.5		16.9		18.3		19.3		19.8		13.4		13.4		13.7		33			***	16.2036		2			***		***	0	***	-4			***	1.14
1982-10-09	15.6		16.8		14.3		16.2		16		15.3	*	17.2		19		19.5		8.8		9.1		9.3		28			***	37.0368		9			***		***	0	***	-7			***	2.02
1982-10-10	14.5		19.1		11.3		14.9		14.7	*	15.3		16.8		18.7		19.2		7.3		7.3		7.5		0			***	111.11		38			***		***	0	***	-6			***	1.09
1982-10-11	14.2		16.6		11.2		14.5		14.3		15.1		16.4		18.4		19.3		10.6		10.7		11		5			***	47.4534		17			***		***	0	***	-3			***	0.79
1982-10-12	18		23.1		14.1		18.6		18.3		17.3	*	17.8		18.2		19.2		12.7		12.8		12.9		0.5			***	146.99	*	59			***		***	0	***	1			***	0.66
1982-10-13	18		24.7		12.5		19		18.9		17.5	*	18.2		18.1		19.2		13.4		13.1		12.8		0			***	167.823		61			***		***	0	***	-1			***	0.6
1982-10-14	17.9	*	24.7	*	12.2	*	19.1		19	*	17.4		18.4		18.2		19.1		13.5		13.2		12.8		0			***	156.249		60			***		***	0	***	-2			***	0.51
1982-10-15	17.9	*	24.4	*	11.7	*	19.5		19.6		17.2	*	18.1		18.2		19		13.6		13.3		12.8		0			***	136.573		53			***		***	0	***	-2			***	0.52
1982-10-16	17.8		23.7		11		18.3	*	18		17.4	*	18.5		18.2		19		11.2		11.1		11.3		0			***	93.7494	*	33			***		***	0	***	-2			***	0.85
1982-10-17	11.6		16.4		7.1		12.5		12.5		13.5		16.6		18.2		18.9		1.6		1.8		2.2		0			***	160.879		39			***		***	0	***	-14			***	1.31
1982-10-18	13.4	*	20	*	6.3	*	14.2	*	14.2		13.7		15.6	***	17.9		18.8		6.8		6.7		6.8		0			***	163.193		55			***		***	0	***	-6			***	0.55
1982-10-19	15.8	*	19.1	*	11	*	16.2		16		14.9		15.9		17.5		18.8		12.2		12.1		12.1		10.5			***	48.6108		21			***		***	0	***	1			***	0.85
1982-10-20	20		25.7		14.1		20.6	*	20.1		18.4	*	18.3		17.4		18.3		15.5		15.7		15.6		32.5			***	107.638		33			***		***	0	***	3			***	1.43
1982-10-21	15.7		22.4		10.3		16.9		16.9		15.6	*	17.4		17.6		18.2		9		9		8.8		0			***	166.666		58			***		***	0	***	-7			***	0.63
1982-10-22	14.1		21.6		8.5		15.3		15.4		14.2		16.4		17.5		18.2		5.9		6		6.2		0			***	170.138		57			***		***	0	***	-8			***	0.58
1982-10-23	13.7		22		6.7		14.7		14.7		13.4		15.4		17.3		18.2		5.7		5.6		5.7		0			***	165.508		55			***		***	0	***	-6			***	0.62
1982-10-24	15.1		19.8		9.1		15.8		15.6		14.2		15.5		17		18.2		9.8		9.5		9.5		0			***	71.7588		9			***		***	0	***	-1			***	0.95
1982-10-25	11.3		16.6		5.6		12.9		12.9		12.4		15.1		16.9		18.2		-3.3		-2.3		-1.1		0			***	168.98		35			***		***	0	***	-11			***	1.33
1982-10-26	9.8		18.2		2		11.3		11.6		10.9		13.7		16.6		18.1		-0.3		-0.1		0.3		0			***	165.508		33			***		***	0	***	-10			***	0.9
1982-10-27	10.3	*	19.5	*	2.6	*	12.6		13.1		10.5		12.9		16.2		18		3.5		3.5		3.6		0			***	155.092		51			***		***	0	***	-8			***	0.41
1982-10-28	13		20.9		3.5		13.9		13		11.5		13.2		15.8	***	17.9	***	8.1		7.9		7.5		0			***	141.203	*	50			***		***	-0.003	***	-2			***	0.55
1982-10-29	15.4		21		10.6		15.9		15.4		13.9		14.4		15.6	***	17.8	***	11.2		11.1		11		0			***	106.481		36			***		***	-0.001	***	2			***	0.91
1982-10-30	13.4	*	19	*		***	14	*	13.6	*	13.6	*	14.4	*	15.1	*	17.1	*	9.9		9.7		9.6		0			***	84.4902		29			***		***	0.008	***	-2			***	1.29	***
1982-10-31	14.6	*	20.7	*	9.4	*	15.2		14.7		14		14.9		15.7		17.5		10.7		10.3		10.2		0			***	118.055		47			***		***	0.0137		-2			***	0.62	***
1982-11-01	16.3		21.5		10.9		16.8		16		15.3		15.4		15.7		17.4		12.2		12		12.2		0			***	83.3328		37			***		***	0.0117		3			***	0.59
1982-11-02	13.3		16.3		6.8		13.9		13.3		13.9		15.5		15.8		17.3		3.4		3.5		4		0			***	94.9068		19			***		***	0		-7			***	1.1
1982-11-03	9.3		16.1		1.7		10.8		11		10.9		13.4		15.8		17.3		0.4		1		1.5		0			***	140.045		35			***		***	0.0233		-9			***	0.49
1982-11-04	13.2		18.7		8.9		14		13.4		13.3		13.9		15.5		17.2		7.7		7.6		7.9		0			***	109.953		44			***		***	0.0181		0			***	0.64
1982-11-05	14		15.6		11.6		14.6		14		13.8		14.5		15.4		17.2		11.3		11.3		11.5		17			***	23.148		7			***		***	0.023	***	0			***	0.52
1982-11-06	13.1		16.6		7.8		13.9		13.5		13.2		14.3		15.4		17.1		6.4		6.5		6.8		0			***	109.953		45			***		***	0.0075	*	-4			***	1.28
1982-11-07	11.9		12.6		11.2		12.3		11.7		12.8		14		15.4		16.9		8.5		8.6		8.9		29			***	16.2036		3			***		***	0.0516	***	-3			***	0.51
1982-11-08	14.2		19.1		10.6		14.7		14.1		13.9		14.4		15.1		16.5		9.6		9.6		9.7		0.5			***	114.583		42			***		***	0.0228	*	0			***	0.7
1982-11-09	14.7		16.4		13		15.1		14.2		14.4		14.8		15.1		16.5		11.6		11.5		11.6		3			***	35.8794		14			***		***	0.0051	*	1			***	0.63
1982-11-10	13.8		14.8		12.5		14.3		13.4		14.1		14.9		15.2		16.5		11.1		11.1		11.2		18.5			***	15.0462		6			***		***	0.0063	*	-2			***	1.55
1982-11-11	12.9		15.9		9.2		13.7		13.2		13.5		14.4		15.2		16.1		10.2		10.4		10		9			***	45.1386		20			***		***	0.0341	***	-2			***	0.94
1982-11-12	11.4		19.6		6.8		13.4		13.9		12.1		13.8		15.1		16.1		4.9		4.8		5		0			***	134.258		40			***		***	0.0164		-7			***	0.86
1982-11-13	11.6		18.4		4		12.8		13.1		11.1		12.7		14.9		16.2		5		5		4.8		0			***	128.471		36			***		***	0.0108		-5			***	0.7
1982-11-14	12.9		18.2		9.3		13.6		13.2		12.8		13.6		14.7		16.2		6.9		6.3		6.9		0			***	111.11		31			***		***	0.0164		-2			***	0.55
1982-11-15	11.8		16.8		7.5		12.7		12.6		12		13.1		14.6		16.2		7.3		6.6		7.3		0			***	56.7126		17			***		***	0.0082		-2			***	0.47
1982-11-16	14.4		18		11.2		15		14.7		13.5		13.8		14.5		16.2		9.2		8.7		9.5		0			***	65.9718		22			***		***	0.0059		2			***	0.88
1982-11-17	11.6		14.1		7.3		12.6		12.5		12.5		13.9		14.6		16.1		9.4		8.7		8.8		4.5			***	15.0462		1			***		***	-0.0072	*	-6			***	1.28
1982-11-18	11.9		15.8		6.4		12.4		12.1		12		12.9		14.6		16.1		8.4		7.7		8.3		0			***	63.657		24			***		***	0.0076		-1			***	0.46
1982-11-19	12.6		16.7		9.8		13.2		12.8		12.6		13.4		14.4		16		8.5		7.7		8.3		0			***	67.1292		43	***		***		***	0.0085		-2			***	0.51
1982-11-20	12.6		17.8		8.3		13.2		13.2		12.2		13.2		14.4		16		6.4		5.7		6.3		0			***	107.638		39	***		***		***	0.0084		-3			***	1.09
1982-11-21	11.7		15		8		12.4		12.3		11.9		13.1		14.4		15.9		4.8		4.1		4.8		0			***	61.3422		28	***		***		***	0.0048		-5			***	1.04
1982-11-22	11		15.1		6.4		11.3		11		11.6		12.6		14.3		15.9		7.2		6.4		7.1		0			***	61.3422		32	***		***		***	0.0104		-2			***	0.56
1982-11-23	13.6		17.9		11		13.9		13.7		12.9		13.5		14.2		15.9		6.9		6.3		6.9		0			***	67.1292		36	***		***		***	0.0035		0			***	1.22
1982-11-24	11.6		16.8		6.2		12		11.7		12		13.4		14.2		15.8		1.3		0.8		1.5		0			***	104.166		29	***		***		***	0.0194		-5			***	1.65
1982-11-25	6.3		11.4		0.8		7.2		7.2		8.1		11.3		14.2		15.8		-7.3		-7.7		-6.7		0			***	122.684		20	***		***		***	0.0184		-11			***	1.95
1982-11-26	3.9		12.6		-2.8		5.5		6		6.6		9.5		13.8		15.7		-4.5		-5.1		-4.4		0			***		***		***		***		***	0.0185		-12			***	0.89
1982-11-27	3.3		11.7		-2.9		5.3		6.1		6.8		9.1		13.3		15.7		-4.8		-5.2		-4.5		0			***	118.055			***		***		***	0.0131		-8			***	0.63
1982-11-28	1.3		9.6		-5.1		3.8		5.1		6.4		8.8		12.8		15.6		-6.4		-6.4		-5.6		0			***	118.055			***		***		***	0.0182		-9			***	0.47
1982-11-29	4.4		10.6		-3.1		5.2		5.7		6.7		8.4		12.3		15.4		-1.2		-1.8		-1.4		0			***	79.8606			***		***		***	0.0134		-4			***	0.7
1982-11-30	13.6		19		6.9		14.6		14.5		11.6		11		11.9		14.8		10.7		10.4		10.8		28.5			***	48.6108			***		***		***	0.0089	*	6			***	1.28
1982-12-01	9.7		16.5		4.5		11.9		12.3		10.1		11.3		12		14.4		4.8		4.3		4.4		0			***	93.7494			***		***		***	0.0047		-7			***	0.6
1982-12-02	8.8		16		1.1		10		10.2		8.1		9.8		12.1		14.4		1.9		1.4		2.1		0			***	109.953			***		***		***	0.0129	*	-7			***	0.88
1982-12-03	10.6		17.1		3.1		11.2		11.2		9.3		10.3		12		14.4		3.6		2.9		3.6		0			***	107.638			***		***		***	0.0046		-1			***	1.71
1982-12-04	10.5		15.4		6		11.5		11.3		10.1		11.1		11.9		14.4		4.4		3.7		3.9		0			***	97.2216			***		***		***	0.0097		-4			***	0.79
1982-12-05	11.8		19		4		12.5		12.6		9.9		10.6		12		14.3		6.7		6		6.3		0			***	85.6476			***		***		***	0.0007	*	1			***	2.74
1982-12-06	6		10.7		-2.2		6.6		6.5		8.5		10.7		12.1		14.3		-2.7		-3.1		-1.8		4			***	53.2404			***		***		***	0.0045		-15			***	0.93	*
1982-12-07	0.1		7		-3.9		2.1		2.7		3.9		7.2		12		14.3		-6.6		-6.9		-6		0			***	86.805		52	***		***		***	0.0088		-14			***	0.46
1982-12-08	2.2		11		-4.9		3.8		4.4		4		6.5		11.4		14.2		-4.2		-4.6		-3.9		0			***	113.425			***		***		***	0.0092		-9			***	0.67
1982-12-09	0.8		6.6		-2.1		2.4		3.1		3.5		6		10.9		14.1		-3.7		-4		-3.7		0			***	43.9812			***		***		***	0.0046		-10			***	0.56
1982-12-10	4		12.8		-2.2		5.1		5.9		3.8		5.8		10.4		14		-1.5		-2.3		-1.8		0			***	104.166			***		***		***	0.0083		-6			***	0.79
1982-12-11	8.1		18.9		-0.8		8.9		9.4		6.2		6.8		10.1		13.9		4.4		3.4		3.7		0			***	86.805			***		***		***	0.0047		3			***	1.48
1982-12-12	11.1		13.1		8		11.5		11.3		8.8		9		10		13.7		4.7		4.4		4.9		0			***	26.6202			***		***		***	-0.0038		2			***	1.56
1982-12-13	4.8		7.7		-1.6		5.9		6		6.3		8.2		10.2		13.5		-3.5		-3.8		-2.8		0			***	33.5646			***		***		***	0.0006		-10			***	0.69
1982-12-14	2.4		7		-2.3		3.1		3.1		4		6.2		10.2		13.4		-1.6		-2.3		-1.6		0			***	24.3054			***		***		***	0.0023		-8			***	0.57
1982-12-15	3.9		10.7		-1.7		5.7		6.2		4.6		6.4		9.9		13.3		0.3		-0.7		-1.2		0			***	100.694			***		***		***	0.0105		-7			***	0.58
1982-12-16	3.7		9.7		-1.1		4.6		5		4.4		6		9.7		13.2		-0.5		-1.2		-0.5		0			***	52.083			***		***		***	0.0046		-4			***	0.5
1982-12-17	4.3		7.4		-0.2		5.1		5.2		5.1		6.5		9.5		13.1		1		0.2		0.7		0			***	15.0462			***		***		***	0.0004		-6			***	0.49
1982-12-18	3.9		10.5		-1.7		5.1		5.7		3.8		5.8		9.4		12.9		-4.7		-5.3		-4.5		0			***	98.379			***		***		***	0.0065		-6			***	0.93
1982-12-19	1.7		7		-2.8		3.2		3.7		3.6		5.7		9.2		12.8		-5.3		-5.5		-4.7		0			***	67.1292			***		***		***	0.0062		-8			***	0.67
1982-12-20	0.7		9.4		-4.8		2.7		3.8		2.5		4.9		9		12.7		-4.2		-4.8		-4.6		0			***	105.323			***		***		***	0.0116		-7			***	0.59
1982-12-21	5		12.8		-4.1		5.7		5.7		3.5		5		8.7		12.5		-0.4		-1		-0.8		0			***	94.9068			***		***		***	0.0016		-2			***	1.23
1982-12-22	6.3		6.9		5.6		6.4		6.1		5.9		6.4		8.5		12.4		2.9		2.1		2.7		6			***	9.2592			***		***		***	0.0041		0			***	0.77
1982-12-23	6.3		14.1		2.6		7.4		7.5		6.1		7		8.6		12.3		1.4		1		1.7		0.5			***	68.2866			***		***		***	0.0051		-4			***	0.71
1982-12-24	4.5		14.2		-2.2		7.5		8		4.1		6		8.7		12.2		-3.3		-3.7		-2.8		0			***	97.2216			***		***		***	0.0063		-7			***	0.84
1982-12-25	5.3		11.4		-0.4		6.5		6.6		4.4		5.8		8.6		12		-3.3		-3.7		-2.9		0			***	93.7494			***		***		***	0.0033		-2			***	0.81
1982-12-26	3.5	*	5.8	*		***	3.7	*	3.5	*	4.4	*	5.8	*	8.1	*	11.4	*	-0.5	*	-1	*	-0.2	*	7.5	*		***	10.4166	*		***		***		***	0.0258	***	-4	*		***	0.85
1982-12-27	5.7		10.3		2.5		6.4		6.6		5.4		6.3		8.4		11.8		1.3		0.8		1.5		0			***	70.6014			***		***		***	0.0173	***	-2			***	0.64	*
1982-12-28	5.2		11.2			***	5.9		6.1		4.7		6.1		8.4		11.7		-1.6		-2.4		-1.8		0			***	106.481			***		***		***	0.0048		-5			***	1.07
1982-12-29	5.8		11.4		2.1		6.7		6.8		5.7		6.6		8.4		11.6		1.1		0.3		0.4		0			***	69.444			***		***		***	0.0079		-2			***	0.63
1982-12-30	4.1		11.7		-2.2		4.5		4.7		5		6.3		8.4		11.5		-0.8		-1.7		-1.1		0			***	93.7494			***		***		***	0.0134		-3			***	1.1
1982-12-31	2.3		8.4		-2.9		3.2		3.5		3.3		5.6		8.4		11.5		-7.1		-7.5		-6.6		0			***	108.796		53	***		***		***	0.0074		-10			***	1
1983-01-01	0.9		8.6		-5		2.2		2.5		2.7		4.9		8.2		11.4		-7.3		-7.7		-6.9		0			***	115.74		40	***		***		***	0.0098	***	-7			***	0.89
1983-01-02	-0.8		6.2		-7.3		1		1.6		1.9		4.2		8		11.4		-7.4		-7.9		-7.5		0			***	108.796		31	***		***		***	0.0107	***	-7			***	0.48	***
1983-01-03	-0.4		7.7		-6.3		1.4		2		1.8		4		7.7		11.3		-6.6		-7.2		-6.8		0			***	115.74		25	***		***		***	0.0122	***	-6			***	0.54	***
1983-01-04	0.8		7.3		-7.1		2.3		3.1		1.5		3.6		7.5		11.2		-6.9		-7.5		-7		0			***	118.055		37	***		***		***	0.0069		-6			***	0.67	***
1983-01-05	2.4		7.3		-2.1		3.3		3.3		2.6		3.9		7.2		11.1		-2.8		-3.5		-2.9		0			***	49.7682		51	***		***		***	0.0057	*	-3			***	0.66
1983-01-06	6.8		8.8		3.7		7		6.7		5		5.2		7.1		10.9		1.3		0.8		1.4		4			***	30.0924			***		***		***	-0.0015	***	2			***	1.52	*
1983-01-07	7		9.4		4.1		7.4		7		5.8		6.1		7.2		10.8		0.7		0.3		1.1		0.5			***	68.2866			***		***		***	0.0031		2			***	0.88
1983-01-08	6.6		9.1		5.2		7		6.7		6.5		6.9		7.4		10.7		3.9		3.4		3.9		1			***	21.9906			***		***		***	0.0032		0			***	0.75
1983-01-09	5.2		9.9		-0.1		6.2		6.2		5.2		6.6		7.7		10.7		-5.6		-5.8		-4.5		0			***	81.018			***		***		***	0.007		-6			***	0.91
1983-01-10	2		8.1		-2.6		2.5		2.5		3.3		5.4		7.8		10.6		-9		-9.3		-8.4		0			***	105.323		3			***		***	0.0127	*	-8			***	1.35
1983-01-11	1.2		7.6		-4.1		2.1		2.3		1.6		4.1		7.6		10.6		-11.8		-12.1		-11.3		0			***	118.055		-1			***		***	0.0108	***	-10			***	1.55	*
1983-01-12	1.1		10.6		-6		3.1		3.8		1.6		3.7		7.3		10.5		-7.9		-8.3		-7.4		0			***	114.583		12			***		***	0.0074	***	-6			***	0.64	***
1983-01-13	3		9.6		-2.6		3.8		3.8		2.8		4.1		7.1		10.5		-3.9		-4.5		-4.2		0			***	112.268		13			***		***	0.0109	***	-3			***	0.84	***
1983-01-14	1.2		7.6		-5		2.8		3.1		2		4		6.9		10.4		-9		-9.1		-8.5		0			***	119.212		8			***		***	0.0118	***	-7			***	1.13	***
1983-01-15	0.7		8.4		-6.2		1.9		2.2		1.6		3.5		6.8		10.3		-7.7		-8.2		-7.6		0			***	115.74		6			***		***	0.01	***	-6			***	0.72	***
1983-01-16	0.4		7.2		-4.7		1.8		2.2		2.1		3.7		6.6		10.2		-6		-6.5		-6.4		0			***	111.11		16			***		***	0.0102	***	-4			***	0.59	***
1983-01-17	3.5		11.1		-4.1		4.2		4.9		2.6		3.7		6.5		10.2		-4		-4.7		-4.3		0			***	108.796		19			***		***	0.0095	*	-1			***	1.04	***
1983-01-18	3.3		6.5		1.1		3.5		3.4		3.5		4.6		6.5		10		-0.5		-1		-0.5		7.5			***	20.8332	*	-3			***		***	0.0052		-4			***	2.25	*
1983-01-19	2.4		6.8		-2.8		3		3.2		3.1		4.2		6.5		10		-1.4		-1.9		-1.6		0			***	74.0736		9			***		***	0.0111		-2			***	1.05
1983-01-20	1.6		6.9		-4.2		2.4		2.3		3.1		4.6		6.5		9.9		-5.2		-5.8		-4.9		0			***	103.009		15			***		***	0.0117	***	-6			***	1.21
1983-01-21	0.3		6.7		-5.1		1.2		1.5		1.9		3.8		6.5		9.8		-7.1		-7.6		-6.8		0			***	115.74		13			***		***	0.0074	***	-6			***	0.8	***
1983-01-22	-1.5		4.6		-7.6		-0.7		-0.5		1		3.2		6.4		9.7		-10.4		-10.9		-10.1		0			***	130.786		9			***		***	0.0102	***	-8			***	0.74	***
1983-01-23	-2.6		5.8		-9.5		-0.8		0.2		0.4		2.7		6.2		9.7		-11.3		-11.7		-10.7		0			***	129.629		10			***		***	0.0082	***	-7			***	0.7	***
1983-01-24	0.4		9.7		-7		2		2.5		0.8		2.7		6		9.6		-7.9		-8.4		-7.8		0			***	126.157		11			***		***	0.0116	***	-5			***	1.11	***
1983-01-25	1.2		10		-4.9		3.6		4.5		1.4		3		5.8		9.5		-4.2		-5		-5.1		0			***	127.314		16			***		***	0.0114	***	-3			***	0.6	***
1983-01-26	4		13.1		-4.6		5.3		5.6		2		3.4		5.7		9.4		-5.1		-5.6		-5.1		0			***	130.786		15			***		***	0.0093		-2			***	1.01	***
1983-01-27	1.3		10.3		-5.4		4.1		4.8		1.8		3.6		5.8		9.3		-7.1		-7		-6.7		0			***	128.471		15			***		***	0.0142		-4			***	0.57
1983-01-28	1.8		11.9		-5.3		4		4.8		1.8		3.5		5.8		9.3		-6		-6.1		-6.7		0			***	128.471		17			***		***	0.0123		-4			***	0.59
1983-01-29	3.1		13.1		-4.6		5.2		6.4		2.3		3.7		5.7		9.2		-3.1		-3.1		-3.8		0			***	126.157		20			***		***	0.0132		-3			***	0.72
1983-01-30	5.4		14		-1.9		6.3		6.7		3.8		4.3		5.8		9.1		-1.4		-1.1		-1.5		1			***	113.425		24			***		***	0.0084		2			***	1.75
1983-01-31	3		8.6		-3.4		4.1		4.1		2.8		4.5		5.9		9.1		-7		-6.2		-6.5		0			***	141.203		20			***		***	0.0238	***	-6			***	2.08
1983-02-01	3.6		9		-2.4		3.8		3.5		3.5		4.4		5.9		9		-3.5		-3.2		-4	*	0	*		***	89.1198		25			***		***	0.0104		1			***	0.92
1983-02-02	3.4		4.2		2.9		3.5		3.2		4		4.9		6		9		0.3		0.6		0		3.5			***	11.574		2			***		***	0.0295	***	-2			***	0.7
1983-02-03	4		8.8		-2.9		4.9		4.8		4.6		5.3		6.1		9		-2.8		-2.1		-2.6		0.5			***	96.0642		14			***		***	0.007		-1			***	0.78
1983-02-04	0.9		7.5		-6.2		2.2		2.5		2.7		4.6		6.2		8.9		-7.2		-6.9		-7.5		0			***	144.675		20			***		***	0.0126		-5			***	0.64
1983-02-05	2		9.7		-3.3		3.5		3.6		3.1		4.6		6.2		8.9		-5.5		-5.3		-6.3		0			***	141.203		22			***		***	0.0136		-3			***	0.72
1983-02-06	3.6		12.9		-4.7		4.5		4.8		3.5		4.7		6.2		8.9		-3.4		-3.4		-4.4		0			***	137.731		14			***		***	0.0107		-1			***	1.14
1983-02-07	3.1		9.7		-1.2		3.9		4		3.7		5		6.2		8.9		-4.4		-3.9		-4.5		2.5			***	123.842		33			***		***	0.0331	*	-2			***	0.98
1983-02-08	1.8		8.2		-3.5		3		3.3		3.3		4.8		6.3		8.9		-6.2		-5.8		-6.8		0			***	134.258		16			***		***	0.0116		-4			***	0.79
1983-02-09	1.7		10.5		-4.9		3.6		4		2.4		4.3		6.3		8.9		-9.6		-8.9		-9.5		0			***	145.832		20			***		***	0.014		-5			***	1.04
1983-02-10	3.2		8.8		-2.4		3.9		3.8		2.9		4.3		6.2		8.9		-8.3		-7.8		-9.1		0			***	144.675		34			***		***	0.0135		-2			***	1.37
1983-02-11	0.9		7.6		-6.1		2.1		2.2		2.3		4.2		6.1		8.9		-8.4		-8.2		-10.2		0			***	155.092		20			***		***	0.0108		-5			***	1.17
1983-02-12	1.4		8.8		-5.1		2.7		3.3		2.1		3.9		6.1		8.8		-10		-9.3		-11.1		0			***	146.99		19			***		***	0.0132		-4			***	1
1983-02-13	-0.8		6.2		-8.6		-0.2		0		1.3		3.5		6		8.8		-12.6		-12		-14.6		0			***	157.406		18			***		***	0.0146		-6			***	1.08
1983-02-14	0.5		6.6		-6.8		0.8		0.9		1.6		3.4		5.8		8.8		-10.2		-9.9		-12.2		0			***	159.721		19			***		***	0.0144		-4			***	1.09
1983-02-15	3.3		10.2		-2.7		4.3		4.3		2.9		4		5.7		8.7		-5.5		-5		-7.2		0			***	130.786		20			***		***	0.0131		-1			***	1
1983-02-16	5.6		11		-3.1		6.3		6.2		3.8		4.4		5.7		8.7		-5.5		-5		-7.2		0			***	144.675		21			***		***	0.0103		1			***	1.86
1983-02-17	3.5		6.4		2.1		3.6		3.4		3.7		4.8		5.8		8.6		-0.5		0.1		-2		22.5			***	20.8332	***	5			***		***	0.019	*	-3			***	2.98
1983-02-18	4.2		7.5		1.8		4.4		4.3		4.6		5.2		5.9		8.4		-0.1		0.4		-0.6		4.5			***	75.231	*	31			***		***	0.0471	***	1			***	1.64
1983-02-19	3.5		8.8		-0.8		3.9		3.9		3.3		5		6		8.3		-8.4		-7.5		-7.7		0.5			***	170.138		47			***		***	0.0172		-4			***	1.96
1983-02-20	3		8.7		-4		4.2		4.4		2.8		4.5		6		8.3		-10.4		-9.8		-9.7		0			***	167.823		35			***		***	0.0139		-3			***	1.12
1983-02-21	2.8		8.2		-2.2		3.1		3		2.2		4.2		6		8.3		-11.5		-10.9		-11.3		0			***	175.925		26			***		***	0.0395	***	-6			***	1.41
1983-02-22	2.8		9.4		-5.3		3.7		3.6		2.5		4		5.9		8.3		-10.4		-10		-10.2		0			***	178.24		40			***		***	0.015	*	-3			***	0.45
1983-02-23	4		10.9		-4.1		4.6		4.6		4		4.8		5.8		8.3		-6.5		-6.1		-6.6		0			***	158.564		35			***		***	0.0079		0			***	0.35
1983-02-24	2.7		5.3		1.3		2.8		2.5		3.3		4.6		5.9		8.3		-1.6		-1		-1.5		10			***	28.935		9			***		***	0.0219	***	-4			***	0.7
1983-02-25	3.4		10.3		-2.4		4		4.1		4.2		5		5.9		8.3		-4.4		-4.1		-4.5		0			***	163.193		44			***		***	0.017		0			***	1.07
1983-02-26	3.1		8.2		-1.1		3.6		3.5		2.9		4.7		6		8.3		-10.6		-10		-10.3		0			***	186.341		37			***		***	0.0163		-6			***	1.84
1983-02-27	4.5		10		-0.5		4.9		4.6		3.3		4.6		6		8.3		-9.8		-9.3		-9.8		0			***	184.027		32			***		***	0.0219		-2			***	2.06
1983-02-28	4.2		12.6		-3.2		5.8		6.1	*	3.8	*	5	*	5.9	*	8.3	*	-8.5		-8.1		-15.8	***	0			***	185.184		37			***		***	0.0217		-2			***	1.13
1983-03-01	5.9		14		-2.9		7		7.1		4.8		5.4		6		8.3		-6.6		-6.3			***	0			***	174.767		42			***		***	0.0154		2			***	0.98
1983-03-02	6.2		8.1		5.1		6.4		6.1		5.7		6.2		6.1		8.3		1.5		2			***	4.5			***	19.6758		7			***		***	-0.0035	*	0			***	1.46
1983-03-03	8.4		16.7		2.7		8.7		8.3		6.7		6.9		6.3		8.3		-1.1		-0.6			***	0			***	171.295		71			***		***	0.0161		3			***	1.69
1983-03-04	4.5		8.1		0.8		4.9		4.7		5		6.3		6.6		8.3		-2.6		-2.3			***	0			***	68.2866		1			***		***	0.0013	***	-5			***	0.4688
1983-03-05	3		9		-2.8		3.7		3.8		4.8		6.1		6.7		8.3		-6.8		-6.3			***	0			***	200.23		48			***		***	0.0188	*	-3			***	1.02	***
1983-03-06	3.5		11.1		-4.7		4.3		4.4		5		6.1		6.7		8.4		-6.3		-5.6			***	0.5			***	193.286		44			***		***	0.0175		-2			***	1.36	*
1983-03-07	4.1		9.3		-2.2		4.6		4.4		4.4		5.9		6.7		8.4		-11.5		-10.9			***	0			***	194.443		47			***		***	0.0225		-3			***	1.58
1983-03-08	2.6		8		-3.2		3.3		3.4		4		5.8		6.7		8.4		-11.2		-10.7			***	0			***	182.869		34			***		***	0.0285		-5			***	1.19
1983-03-09	2.4		9.7		-6.1		3.4		3.7		4.2		5.6		6.7		8.5		-8.5		-8.1			***	0			***	199.073		44			***		***	0.0183		-1			***	1.01
1983-03-10	5		7		2.4		5.2		5		5.3		6		6.7		8.5		0.5		0.8			***	16			***	32.4072		10			***		***	0.0544	***	0			***	0.94
1983-03-11	8.2		15.3		2.6		9.1		8.9		6.9		7.2		6.7		8.5		-1.8		-1.3			***	0			***	206.017		76	*		***		***	0.0288	***	1			***	1.42
1983-03-12	7.3		10.9		0.8		7.7		7.5		6.6		7.1		6.9		8.5		-1.5		-1.2			***	0			***	124.999		35			***		***	0.0065		2			***	1.07
1983-03-13	7.2		10.6		4.2		7.5		7.2		7.4		7.9		7.1		8.4		3.6		4			***	26.5			***	28.935		15			***		***	0.0156	***	0			***	1.66
1983-03-14	5.2		9.2		-0.8		5.6		5.4		5.5		7.3		7.4		7.9		-7.7		-6.8			***	2			***	218.749		83			***		***	0.0313	***	-5	*		***	1.4
1983-03-15	4.1		11		-3.8		5.2		5.2		4.7		6.2		7.4		8.1		-6.8		-6.5			***	0			***	190.971		48			***		***	0.0155		-3			***	1.17
1983-03-16	5.4		9.4		-1.3		6		5.9		5.5		6.4		7.2		8.2		-2.3		-1.9			***	1			***	135.416		43			***		***	0.0099		0			***	1.53
1983-03-17	6.1		8.5		4.1		6.4		6.3		6.1		6.9		7.2		8.3		1.1		1.6			***	14			***	38.1942		4			***		***	0.0066		-2			***	1.4
1983-03-18	5.5		8.9		1.2		5.7		5.3		4.4		6.3		7.2		8.3		-8.7		-8			***	0			***	229.165		71			***		***	0.019		-6			***		***
1983-03-19	4		12.5		-4.7		5		5		5.1		6.1		7.1		8.4		-8		-7.6			***	0			***	224.536		58			***		***	0.0142		1			***	0.67
1983-03-20	6.2		13.4		-1.9		6.8		6.7		6.6		7		7.1		8.4		-0.3		-0.1			***	0			***	156.249		45			***		***	0.0128		3			***	1.2
1983-03-21	4.7		8		1		5.7		5.9		5.7		7		7.2		8.5		2.9		2.6			***	7.5			***	33.5646		-5			***		***	0.007		-6			***	0.7
1983-03-22	7.5		16.4		-0.1		7.9		8.5		7.9		7.7		7.3		8.5		1.4		1			***	0			***	208.332		83			***		***	0.0163		7			***	1.31
1983-03-23	10.8	*	16.9	*		***	11.2	*	10.8		10.5		9.6		7.5		8.6		4.6		5			***	4			***	126.157		51	*		***		***	0.0131	***	6	*		***	1.2
1983-03-24	9.9		12.5		6.7		10.1		9.7		10.3		10.6		8		8.6		5.8		6.4			***	12.5			***	46.296		24			***		***	0.0209	***	1			***	1.67
1983-03-25	7.1		9.9		5.3		7.2		6.9		8.4		9.5		8.4		8.6		-0.3		0.1			***	0			***	136.573		55			***		***	0.0107		-1			***	1.57
1983-03-26	7.3		11.1		5.1		7.5		7.1		8.6		9.4		8.6		8.7		-0.8		-0.4			***	0			***	131.944		49			***		***	0.0137		0			***	1.32
1983-03-27	5.2		6.3		3.7		5.3		4.9		7.2		8.6		8.7		8.8		0.7		1.2			***	6.5			***	53.2404		21			***		***	0.0085		-3			***	0.89
1983-03-28	7.5		11.7		5		7.6		7.2		8.4		9		8.7		9		2.4		2.8			***	0			***	93.7494		37			***		***	0.0094		2			***	1.28
1983-03-29		***	14.5	***		***	6.3	***	6.1	***	6.2	***	7.4	***	7.2	***	7.5	***	-2.3		-1.8			***	0			***	131.944		52			***		***	0.0092		-2			***	1.6
1983-03-30	8		10.9		5.4		7.9		8		8.3		9.1		8.8		9.2		1		1.5			***	1			***	62.4996		20			***		***	0.0096		0			***	0.76
1983-03-31	7.9		13.3		0.7		8.2		8.3		8.5		9.2		8.9		9.3		-1.7		-1.2			***	0			***	225.693		77			***		***	0.0127		0			***	2.05
1983-04-01	10		14.7		6		10.1		10		9.1		9.4		9		9.3		5.2		5.6			***	18.5			***	37.0368		18			***		***	-0.007	*	5			***	2.15
1983-04-02	13.5		17		9.9		13.4		13.4		12.6		11.8		9.1		9.3		5.4		5.8			***	0			***	186.341		71			***		***	0.0084		8			***	2.02
1983-04-03	11.4		17.3		4.3		11.3		11.3		11.6		11.8		9.5		9.4		2.1		2.5			***	0			***	228.008		75			***		***	0.0155		2			***	1.91
1983-04-04	12.3		19.5		5.5		12.2		12.4		11.3		11.5		9.8		9.5		4.2		4.3			***	0			***	137.731		43			***		***	0.0069		2			***	2.03
1983-04-05	10.5		15.3		6.7		10.4		10.6		10.9		11.6		10.1		9.6		0.7		1			***	0			***	194.443		65			***		***	0.0147		-1			***	1.69
1983-04-06	11.8		20.3		2.9		12.2		12.7		11.9		11.9		10.2		9.7		2.1		2.4			***	0			***	226.85		68			***		***	0.0215		6			***	1.08
1983-04-07	14		20.2		5.8		14.2		14.5		12.8		12.5		10.4		9.9		5.6		5.6		4.7		0			***	195.601		66			***		***	0.0116		8			***	1.78
1983-04-08	14.2		19.2		11.5		14		14.1		13.5		13.4		10.7		10		5.8		5.9		5.3		0			***	134.258		42			***		***	0.0114		4			***	1.58
1983-04-09	11.7		16.2		7.7		11.5		11.6		12.5		13.1		11.1		10.1		0.6		0.9		0.4		0			***	236.11		75			***		***	0.0146		4			***	1.98
1983-04-10	11.8		17.3		5.1		11.8		12		12.3		12.6		11.3		10.3		6		6.1		5.4		14			***	113.425		41			***		***	0.0089		3			***	1.36
1983-04-11	16		20.3		12.7		15.8		15.8		15.1		14.2		11.5		10.5		11		11.5		10.8		14.5			***	115.74		68			***		***	-0.0043	***	11			***	1.88
1983-04-12	11.3		14		9.1		11.1		11.1		12.5		13.8		11.8		10.7		6.9		7.3		6.7		2			***	28.935		8			***		***	-0.0007		-8			***	1.81
1983-04-13	11.9		18.2		6.4		11.9		12.1		13.6		13.8		12		10.8		4.2		4.3		3.7		0.5			***	252.313		105			***		***	0.0215		5			***	1.33
1983-04-14	11.6		18.4		3.2		11.8		12.5		12.7		13.3		12.1		10.9		3		3.2		2.4		0			***	224.536		76			***		***	0.0162		2			***	1.43
1983-04-15	14		16.8		11.3		13.8		13.9		13.6		13.8		12.2		11		10.6		10.8		10.2		13.5			***	34.722		18			***		***	-0.0104	***	4			***	0.97
1983-04-16	13.4		18.9		9.1		13.2		13.3		13.8		14.4		12.3		11.2		9.8		10.2		9.6		8			***	32.4072		20			***		***	-0.0291	***	-2			***	1.93
1983-04-17	9.5		10.6		8.7		9.3		9.3		11		12.5		12.5		11.5		6.1		6.5		6		17.5			***	27.7776		11			***		***	0.0054	***	-4			***	1.09
1983-04-18	11.9		16.9		8.9		11.7		11.7		13.4		13.4		12.4		11.6		6		6.4		5.9		0			***	217.591		95			***		***	0.0171		6			***	1.27
1983-04-19	12.4		15.6		7.2		12.4		12.7		13.1		13.5		12.4		11.7		8.8		8.8		7.7		5			***	70.6014		25			***		***	0.0033	*	4			***	0.68
1983-04-20	14.1		19.7		9.4		14.2		14.4		14.3		14.5		12.5		11.7		10.8		11		9.6		6.5			***	60.1848		22			***		***	0.004		1			***	1.17
1983-04-21	11.8		16.3		7.3		11.7		11.8		12.8		13.7		12.7		11.8		-0.6		-0.1		-0.6		0.5			***	249.998		91			***		***	0.0108		0			***	1.76
1983-04-22	12.3		15		10.4		12.3		12.6		12.6		13.5		12.7		11.8		8.1		8.4		7.5		12.5			***	38.1942		11			***		***	0.0102	*	-1			***	1.02
1983-04-23	14.6		19.3		9.8		14.7		15.1		13.9		14.1		12.7		12		6.6		6.7		5.9		0			***	159.721		59			***		***	0.0057		2			***	1.28
1983-04-24	14.2	*	24.6	*		***	14.5	*	15.1	*	13.4	*	12.9	*	11.2	*	10.5	*	6.1	*	6.2	*	5.4	*	0	*		***	238.424	*	94	*		***		***	0.0184	*	13	*		***	1
1983-04-25		***	27.3	***		***	13.8	***	14	***	11.6	***	10.6	***		***		***	3.5	***	3.5	***	3.3	***		***		***		***	83	***		***		***	0.0152	***	12	***		***	0.66	*
1983-04-26	18.3		27.5		10.4		18.6		18.9		16.7		16.6		13.5		12.1		7.7		7.6		6.5		0			***	246.526		87			***		***	0.014		11			***	1.96	***
1983-04-27	20.1		25.5		14.3		20.1		20.3		18		17.4		13.9		12.2		12.3		12.5		11.1		0			***	216.434		83			***		***	0.0069		10			***	3.03
1983-04-28	17.3		22.3		12.7		17.6		18		16.3		16.8		14.3		12.4		12		12		10.7		0			***	63.657		15			***		***	-0.0012		0			***	0.97
1983-04-29	17.9		24.6		14.5		17.6		17.6		18.1		17.7		14.5		12.5		13.1		13.1		12		0			***	145.832		71			***		***	0.0133		10			***	1.77
1983-04-30	12.5		15.6		8.3		12.7		12.9		14.5		16.3		14.8		12.6		7		7.3		6.6		3			***	62.4996		21			***		***	0.007	***	-11			***	1.81
1983-05-01	12.8		17.1		6.5		13		13.4		13.6		14.8		14.8		12.8		6.6		6.8		6.1		1			***	104.166		37			***		***	0.0076		-2			***	1.07
1983-05-02	16.1		21		13.2		15.9		15.9		16.5		16.4		14.5		12.9		9.2		9.4		8.8		0.5			***	196.758		94			***		***	0.0163		9			***	1.32
1983-05-03	16.5		21.7		10.1		16.7		17.1		17.1		17.1		14.7		13		6.2		6.4		6		0			***	218.749		77			***		***	0.0161		5			***	0.94
1983-05-04	18.1		25.6		11.1		18.6		19		18.1		17.8		14.9		13.1		8.5		8.4		7.8		0			***	255.785		91			***		***	0.0192		11			***	1.08
1983-05-05	18.1		26		12.7		18.1		18.2		18.2		18.2		15.2		13.2		8.8		8.8		8.2		0			***	241.897		87			***		***	0.0145		11			***	1.66
1983-05-06	14.8		18.5		12		14.4		14.4		16.6		17.6		15.5		13.3		8.3		8.4		7.9		2			***	141.203		57			***		***	0.0097		1			***	1.87
1983-05-07	19.1		23.6		14.5		18.9		19		18.1		17.9		15.7		13.5		14.4		14.7		13.9		8.5			***		***	30			***		***	0.0001	***	4			***	1.22
1983-05-08	16.6		23.2		10		16.7		16.9		17.6		18.2		15.8		13.6		9.1		9.2		8.6		0			***	199.073		68			***		***	0.0036		0			***	0.52
1983-05-09	15.1		21.6		7.3		15.4		15.9		17		17.5		15.9		13.7		6.3		6.2		5.5		0			***	276.619		99			***		***	0.0066		7			***	0.56
1983-05-10	15.6		21.1		9.8		15.7		16		17.1		17.8		15.9		13.8		7.8		7.9		7.2		0			***	253.471		92			***		***	0.0162		6			***	1.52
1983-05-11	18.3		24.6		11.5		18.3		18.6		18.8		18.5		16.1		13.9		10.1		10.2		9.6		0			***	244.211		98			***		***	0.0193		13			***	1.07
1983-05-12	19		23.7		13.9		19.1		19.3		19		19		16.3		14.1		12.5		12.5		11.6		0			***	196.758		82			***		***	0.0108		10			***	1.7
1983-05-13	18.9		22.8		16.2		18.6		18.7		19.4		19.4		16.6		14.2		14.6		14.9		14.1		6			***	108.796		51			***		***	-0.0004	*	2			***	1.49
1983-05-14	20.2		27.3		10.9		20.6		20.8		20.6		20.2		16.8		14.3		11.3		11.6		11.4		0			***	228.008		89			***		***	0.0151		7			***	1.11
1983-05-15	16.1		23.3		8		16.4		16.8		18.2		19.2		17.1		14.4		5.7		6.3		6.1		3			***	258.1		98			***		***	0.0151		4			***	1.24
1983-05-16	14.5		16		13.6		14.3		14.4		16.4		18.2		17.2		14.6		10.9		11.4		10.8		40			***	47.4534		25			***		***	-0.0086	***	-9			***	2.07
1983-05-17	14.6		18.3		8.3		14.5		14.6		16.5		17.4		17.1		15.6		8.3		8.6		8.2		6			***	222.221		109			***		***	0.0088	***	-2			***	1.67
1983-05-18	14.8		20.7		7.2		14.8		15		17		17.5		17		15.6		4.5		4.5		4.5		0			***	289.35		108			***		***	0.0206		3			***	1.08
1983-05-19	17.9		23.4		10.3		18		18.2		18		18.2		16.9		15.5		8.9		8.9		8.4		0			***	269.674		103			***		***	0.0081		7			***	2.33
1983-05-20	20		25.5		15.7		19.9		20.1		19.9		19.4		17		15.4		11.7		11.7		11.3		0			***	254.628		104			***		***	0.0115		11			***	1.17
1983-05-21	20.4		24.9		15.7		20.4		20.7		20.6		20.3		17.3		15.4		13.7		13.7		13.1		0			***	237.267		96			***		***	0.0133		11			***	1
1983-05-22	21.4		28.2		14.9		21.4		21.7		21.5		21		17.7		15.4		13.7		13.7		13.1		0			***	245.369		102			***		***	0.0184		14			***	0.86
1983-05-23	18.4		23.1		14.3		18.5		18.8		20		20.8		18		15.5		8		8.2		8.2		0			***	225.693		87			***		***	0.0084		7			***	1.33
1983-05-24	16.6		21.7		12.1		16.6		16.8		18.3		19.6		18.3		15.6		7.3		8		7.7		0			***	202.545		73			***		***	0.0074		1			***	1.81
1983-05-25	13		16.2		10.7		12.8		12.7		16.2		18.2		18.2		15.7		6.7		6.9		6.4		5			***	101.851		40			***		***	0.0042		-6			***	1.91
1983-05-26	12.2		15.5		9.5		11.9		11.8		15.8		17.4		17.9		15.8		4		4.3		4		0			***	281.248		109			***		***	0.0141		-3			***	2.11
1983-05-27	14.4		18.6		10.2		14.2		14.3		16.2		17.2		17.6		15.8		7.2		7.2		6.9		0			***	136.573		53			***		***	0.0143		0			***	0.89
1983-05-28	18.6		24		12.8		18.5		18.7		18.8		18.5		17.4		15.9		10.6		10.6		10.1		0			***	218.749		87			***		***	0.0107		9			***	1.44
1983-05-29	19		22.7		14.6		19		19.2		19.4		19.2		17.5		15.9		14.1		14.4		13.8		3			***	128.471		53			***		***	0.0018	*	5			***	1.07
1983-05-30	21.4		27.6		14.2		21.6		22		21.3		20.5		17.7		15.9		14.5		14.7		13.8		0			***	247.684		103			***		***	0.0179		10			***	0.78
1983-05-31	21.6		27.3		17.2		21.9		22.1		21.5		21.2		18		15.9		14.8		14.9		14.4		0			***	170.138		67			***		***	0.0125		3			***	0.69
1983-06-01	21.6		25.8		16.1		22.4		22.7		21.1		21		18.3		16		12.9		13.2		12.9		0			***	145.832		51			***		***	0.0034		4			***	0.94
1983-06-02	19.3		25.6		12.7		19.4		19.6		20.3		20.9		18.5		16		7		7.3		7.2		0			***	289.35		111			***		***	0.0137		9			***	1.66
1983-06-03	16.5		19.8		14.8		16.1		16		18.8		20		18.7		16.1		8		8.3		7.7		0			***	164.351		81			***		***	0.0074		4			***	2.08
1983-06-04	16.1		19.8		11.9		15.7		15.6		19.3		20		18.7		16.2		8.1		8.4		7.8		0			***	284.72		118			***		***	0.0141		10			***	1.93
1983-06-05	15.9		21.2		9.6		15.7		15.8		19.1		19.8		18.6		16.3		6.5		6.7		6.3		0			***	298.609		107			***		***	0.0215		12			***	1.38
1983-06-06	17.4		22.6		11.4		17.4		17.5		19.2		19.8		18.7		16.4		10.4		10.7		10.1		3.5			***	189.814		75			***		***	0.0106		8			***	1.13
1983-06-07	19.5		24.5		14.9		19.3		19.4		20.9		20.7		18.7		16.5		12.7		13		12.5		1			***	240.739		97			***		***	0.0171		6			***	0.95
1983-06-08	20.4		24.7		16.1		20.3		20.5		20.5		20.8		18.9		16.6		13.8		14		13.3		0			***	136.573		47			***		***	0.0029		2			***	1.19
1983-06-09	21.2		26.5		16.6		21.3		21.5		21.6		21.2		19		16.6		14		14.3		13.7		2			***		***	89			***		***	0.0113		8			***	1.43
1983-06-10	19.5		24.8		15.3		19.5		19.6		20.9		21.4		19.1		16.7		11.4		11.9		11.6		4			***	217.591		101			***		***	0.0097		0			***	1.26
1983-06-11	15.9		19.7		13.8		15.7		15.7		18.6		20.1		19.3		16.8		10.4		10.8		10.3		8.5			***	170.138		74			***		***	0.0035		-6			***	1.6
1983-06-12	14.8		17.3		13.2		14.5		14.5		16.8		18.6		19.1		16.8		9.5		9.8		9.1		9			***	74.0736		32			***		***	-0.008	*	-7			***	1.37
1983-06-13	17.1		20.5		15		17.3		17.5		17.6		18.3		18.8		16.9		13.9		14.2		13.2		16.5			***	67.1292		27			***		***	-0.0106	***	-1			***	1.16
1983-06-14	21		26.8		15.2		21.5		21.9		19.5		19.4		18.5		17		7.7		8.2		8.1		0			***	307.868		133			***		***	0.0184		6			***	1.47
1983-06-15	21.6		28.7		13.7		21.5		21.7		20.9		20.4		18.6		17		11.5		11.6		11.3		0			***	251.156		102			***		***	0.0078		7			***	1.31
1983-06-16	16.2		17.4		15.1		15.9		15.9		18.2		19.6		18.8		17		12		12.4		11.6		2			***	63.657		26			***		***	-0.0021		-7			***	1.73
1983-06-17	18.7		21		16.5		18.4		18.5		19.2		19.5		18.8		17.1		13.8		13.9		13.3		0			***	69.444		34			***		***	0.0053		1			***	0.87
1983-06-18	16.9		18		16		16.8		16.9		18.4		19.3		18.7		17.1		12.6		12.8		12.3		5			***	69.444		32			***		***	0.0008	*	-3			***	0.9
1983-06-19	19.8		23.8		16.6		19.5		19.6		20.6		20.1		18.6		17.1		14.2		14.4		13.9		0			***	208.332		105			***		***	0.0082		8			***	0.91
1983-06-20	19.1		23.3		16.4		18.8		18.9		19.7		20.3		18.8		17.1		14.9		15.1		14.4		15			***	54.3978		25			***		***	0.0045	***	-2			***	1.26
1983-06-21	19.7		24.9		17.1		19.5		19.5		20.2		20.1		19		17.7		15.3		15.7		14.9		27.5			***	155.092		83			***		***	0.0144	***	4			***	1.12
1983-06-22	17.7		22.1		14.6		17.4		17.4		20.3		20.8		19.1		17.8		11.9		12.3		11.4		0			***	263.887		124			***		***	0.0127		1			***	1.73
1983-06-23	15.9		17.7		14.1		15.6		15.6		18		19.3		19.2		17.7		11.5		11.7		10.8		0			***	54.3978		26			***		***	0.0018		-7			***	1.09
1983-06-24	18.2		22.3		15.7		18		18.1		18.9		19.4		19.1		17.6		14.7		14.9		13.9		27.5			***	65.9718		32			***		***	0.0012		1			***	0.95
1983-06-25	20.5		25.4		16.4		20.2		20.3		21		20.5		19		18.3		14.2		14.5		13.9		18			***	260.415		141			***		***	0.0203		10			***	1.09
1983-06-26	15.8		17.8		14		15.5		15.6		18.3		19.8		19.2		18.2		10.8		11.1		10.5		3.5			***	83.3328		46			***		***	-0.0041		-10			***	2.07
1983-06-27	15.5		17.5		13.9		15.2		15.2		17.3		18.6		19.2		18.1		10.9		11		10.3		0.5			***	63.657		32			***		***	0.0019		-5			***	1.08
1983-06-28	18.9		23.7		15.2		18.7		18.8		19.4		19.5		19		18		13.4		13.6		12.7		0			***	200.23		102			***		***	0.011		4			***	1.05
1983-06-29	19.8		24.7		14.2		19.5		19.7		20.6		20.4		18.9		17.9		13.8		13.9		13.1		0			***	237.267		118			***		***	0.0165		8			***	0.95
1983-06-30	20.9		24.8		17.5		20.8		20.9		21		21.1		19.1		17.9		14.4		14.5		13.8		0			***	168.98		78			***		***	0.0052		3			***	0.99
1983-07-01		***		***		***		***		***		***		***		***		***	10	***	10.1	***	9.5	***		***		***		***	3	***		***		***	-0.0034	***	-2	***		***	0.58
1983-07-02	20.1		24.1		15.9		19.8		19.7		21.4		21.8		19.6		17.8		15.2		15.6		14.5		0			***	143.518		78			***		***	0.0065		1			***	1.74	***
1983-07-03	18.1		20.5		15.7		17.8		17.8		19.2		20.3		19.8		17.9		14.8		15.3		14.1		22.5			***	91.4346		58			***		***	-0.0145	***	-2			***	1.94
1983-07-04	21.5		25.8		18.3		21.1		21.1		21.8		21.4		19.7		18		16.3		16.5		15.4		0			***		***	104			***		***	0.0146		7			***	1.28
1983-07-05	19.1		20.5		18.3		18.9		19		19.9		20.9		19.8		18		16.1		16.6		15.3		19			***	38.1942		21			***		***	0.0308	***	-4			***	1.65
1983-07-06	20		24.8		16.5		19.7		19.7		21.3		21.4		19.9		18.3		15.8		16.3		15.2		4			***	137.731		73			***		***	0.029	***	3			***	1.31
1983-07-07	16.3		19		14		15.9		15.9		18.6		20.2		19.9		18.3		11		11.3		10.4		1.5			***	101.851		61			***		***	0	*	-8			***	1.93
1983-07-08	15.4		16.9		13.6		15.1		15.1		17.5		18.9		19.8		18.3		12.3		12.6		11.6		4			***	40.509		21			***		***	0.0018	***	-6			***	0.9
1983-07-09	18.9		24		16.2		18.6		18.6		19.9		19.9		19.5		18.3		15.2		15.4		14.4		2.5			***	134.258		74			***		***	0.0111		6			***	0.94
1983-07-10	18.1		21.1		16.2		17.7		17.7		19.5		20.1		19.4		18.3		13.2		13.4		12.5		0			***	121.527		69			***		***	0.0054		-1			***	1.51
1983-07-11	16.7		18.5		15.5		16.6		16.6		18.3		19.5		19.5		18.2		11		11.1		10.2		0			***	87.9624		35			***		***	-0.0001		-6			***	1.5
1983-07-12	16.6		20.5		13		16.4		16.5		18		19		19.3		18.2		9.1		9.3		8.6		0			***	158.564		76			***		***	0.0066		-3			***	1.33
1983-07-13	18.3		23.3		14.1		17.9		18		19.7		19.7		19.2		18.1		11.4		11.5		10.8		0			***	230.323		121			***		***	0.027		7			***	0.98
1983-07-14	22.5		28.1		16.3		22.3		22.4		22		21.3		19.2		18.1		16.4		16.5		15.5		0			***	216.434		102			***		***	0.0153		9			***	1.25
1983-07-15	22.7		25		19.5		22.7		22.9		21.9		21.7		19.5		18.1		19.8		20		19		2.5			***	43.9812		19			***		***	-0.0053		4			***	1.46
1983-07-16	25		27.9		23.1		24.9		25		23.8		22.9		19.8		18.1		21.1		21.5		20.5		2			***	116.897		66			***		***	0.0017		9			***	1.63
1983-07-17	20.8		23.4		18.9		20.7		20.8		21.7		22.5		20.1		18.1		17.3		17.9		16.8		1			***	43.9812		24			***		***	-0.0051		-4			***	1.31
1983-07-18	20.5		23.6		18.1		20.6		20.8		21.3		21.7		20.2		18.1		17.2		17.4		16.2		7			***	96.0642		48			***		***	0.0181	*	0			***	0.64
1983-07-19	23.6		29.9		17.3		23.6		24.1		23		22.5		20.2		18.2		18.1		18.1		17.1		0			***	218.749		114			***		***	0.0137		10			***	0.81
1983-07-20	22.7		24		21.6		22.6		22.7		22.8		22.9		20.4		18.3		20		20.3		19.2		4			***	40.509		19			***		***	-0.0054		1			***	1.11
1983-07-21	24		26.1		22.7		24		24.2		23.4		23.1		20.6		18.3		21.2		21.6		20.3		7			***	62.4996		30			***		***	0.0035		4			***	0.58
1983-07-22	23.7		26.5		22.3		23.5		23.7		23.6		23.5		20.8		18.4		20.1		20.5		19.4		2			***	89.1198		51			***		***	0.0033		4			***	0.79
1983-07-23	23.8		27.4		21.6		23.5		23.7		23.9		23.7		20.9		18.5		19.6		19.8		18.8		0			***	127.314		71			***		***	0.0075		5			***	0.97
1983-07-24	24.6		28.2		21.8		24.7		25.1		24.2		24		21.1		18.6		19.8		20.6		19.5		0			***	108.796		52			***		***	0.0086		4			***	0.6
1983-07-25	25		30.7		21.2		25		25.2		24.8		24.5		21.3		18.7		18.7		21.1		20.1		1.5			***	121.527		68			***		***	0.0022		5			***	0.84
1983-07-26	24.4		28.7		20.8		24.2		24.3		24.8		24.8		21.5		18.8		17.8		20.5		19.6		2			***	196.758		114			***		***	0.0113		5			***	0.91
1983-07-27		***	30.5	*		***	21.3	*	21.4	*	22.9	*	23.6	*	20.4	*	17.8	*		***	20.8		20.1		60.5			***	165.508		92			***		***	0.0168	***	4			***	0.792
1983-07-28	25.3		30.5		20.6		25.2		25.4		24.1		24.7		22.3		21			***	20.9		19.8		13			***		***	13	***		***		***	0.0199	***	-1	***		***	0.792	***
1983-07-29	25		29.6		21		24.8		25		24.8		25.4		22.5		20.8			***	20.8		20		0			***	234.952		129			***		***	0.0056		5			***	0.96	***
1983-07-30	26.6		31.4		22.3		26.3		26.4		25.4		25.7		22.7		20.6			***	21.6		21.4		0			***	188.656		110			***		***	0.0108		7			***	0.93
1983-07-31	27.3		30.7		24.5		27.4		27.7		26.2		26.5		23		20.5			***	23.1		23		0			***	142.36		77			***		***	0.0139		6			***	0.5
1983-08-01	22.9		25.5		21.3		22.8		23		23.5		25.4		23.2		20.5			***	20.4		20		3			***	69.444		37			***		***	-0.0026		-6			***	1.48
1983-08-02	22.1		25.7		20.1		21.7		21.7		22.7		24.3		23.2		20.5			***	17.3		17.2		0			***	188.656		112			***		***	0.012		-2			***	1.51
1983-08-03	24.5		30.8		17.7		24.3		24.5		23.7		24.5		23		20.5			***	19.4		19.2		0			***	214.119		118			***		***	0.0211		5			***	0.67
1983-08-04	27.1		31.4		24.1		26.8		26.9		25.7		25.9		23		20.5			***	22.6		22.5		0			***	222.221		125			***		***	0.0183		8			***	1.07
1983-08-05	27.6		32.7		24.3		27.3		27.5		26.3		26.5		23.2		20.5			***	23.1		23		0			***	179.397		100			***		***	0.0173		6			***	0.78
1983-08-06	27.6		33.1		23.3		27.5		27.8		26.3		26.7		23.5		20.5			***	22.7		22.5		0			***		***	107			***		***	0.0215		5			***	0.77
1983-08-07	27.6		32.6		23.3		27.5		27.7		26.4		26.8		23.6		20.6			***	22.9		22.7		0			***		***	111			***		***	0.0186		5			***	1
1983-08-08	27.5		33.7		22.4		27.7		28.1		26.5		27		23.8		20.6			***	21.9		21.8		0			***	226.85		118			***		***	0.026		5			***	0.9
1983-08-09	26.2		31.9		22.3		26		26.1		26.1		26.8		24		20.7			***	21.2		21.1		0			***	214.119		111			***		***	0.0242		5			***	1.11
1983-08-10	24.7		28.1		22.5		24.4		24.4		24.8		26.1		24.1		20.8			***	20.2		20		0			***		***	57			***		***	0.0098		1			***	1.3
1983-08-11	25.9		30.7		22.3		25.6		25.7		25.5		26.1		24		20.9			***	20.9		20.7		0			***	193.286		102			***		***	0.0274		5			***	0.76
1983-08-12	27		32.6		21.8		27		27.2		25.9		26.4		24		21			***	21.1		21		0			***	221.063		116			***		***	0.0269		6			***	0.7
1983-08-13	26.4		31.5		22.5		26.3		26.4		25.6		26.5		24		21			***	21.1		20.9		0			***	207.175		106			***		***	0.0205		4			***	1
1983-08-14	25.7		29.3		22.4		25.5		25.6		25		26		24.1		21.1			***	21.3		21.2		0			***	175.925		97			***		***	0.0229		3			***	1.91
1983-08-15	24.6		25.5		24		24.5		24.6		23.9		25.4		24.1		21.1			***	22.4		22.2		28.5			***	38.1942		24			***		***		***	-1			***	2.67
1983-08-16	26.1		28.9		24.5		25.9		26		24.9		25.7		24		21.2			***	24		23.8		19			***	111.11		70			***		***		***	4			***	2.03
1983-08-17	25.7		26.8		24.4		25.6		25.7		24.5		25.6		24.2		22			***	23.4		23.2		31			***	38.1942		25			***		***		***	0			***	2.02
1983-08-18	26.4		29.5		24.4		26.4		26.5		25.1		25.7		24.3		22.5			***	23.5		23.4		10.5			***	101.851		61			***		***		***	4			***	1.15
1983-08-19	28.1		33.3		23.9		28.1		28.5		26.5		26.7		24.3		22.4			***	22		22		0			***	192.128		110			***		***	0.0204		6			***	1.01
1983-08-20	25.7		31.7		21.7		25.7		25.9		25.3		26.5		24.4		22.2			***	19.8		19.7		0			***	199.073		109			***		***	0.0182		-1			***	1.36
1983-08-21	21.7		23.1		20.6		21.5		21.5		22.7		24.8		24.5		22.1			***	17.5		17.4		0			***	57.87		26			***		***	0.0029		-8			***	1.03
1983-08-22	22.8		25.9		20.2		22.6		22.6		22.6		24.1		24.2		22.1			***	18.8		18.7		0			***	75.231		38			***		***	0.0094		-2			***	0.86
1983-08-23	23.2		26.2		21.2		23		23.1		22.7		24.2		24		22			***	16.9		17		0			***	127.314		70			***		***	0.0079		-3			***	1.26
1983-08-24	21.2		23		19.6		21		20.9		21.8		23.5		23.8		21.9			***	17		17.1		0			***	57.87		32			***		***	0.0054		-5			***	1.06
1983-08-25	23.6		28.6		19.4		23.5		23.7		23.2		23.9		23.6		21.9			***		***	16.4	*	0	*		***	148.147		85			***		***	0.0272		4			***	0.62
1983-08-26	23.2		25.6		21.7		23		23		22.9		24.2		23.4		21.8		18.5			***	17.5	*	0			***	127.314		76			***	415.398		0.009		-2		1008		1.81
1983-08-27	22.4		24.7		21.1		22.2		22.1		22.4		23.8		23.4		21.7		17.4		17.2		17.4		0			***	98.379		56			***	415.278		0.0097		-3		1010.9		1.67
1983-08-28	23		26.1		21		22.8		22.7		22.7		23.8		23.3		21.7		17.3		17		17.4		0			***	131.944		78			***	412.002		0.019		0		1012		0.98
1983-08-29	25.9		32.1		21.6		25.9		26		24.3		24.6		23.3		21.6		21		20.7		21.2		0			***	180.554		105			***	424.692		0.0246		5		1008		0.71
1983-08-30	27.5		33.4		23.1		27.6		27.8		25.4		25.6		23.3		21.6		20.8		20.5		21		0			***	206.017		114			***	429.363		0.0208		4		1008.7		0.87
1983-08-31	26.5		29.9		23.8		26.5		26.6		25		25.7		23.5		21.6		20.9		20.6		21.2		0			***	133.101		69			***	435.498		0.0115		2		1010.8		0.85
1983-09-01	23.9		26.5		21.7		24		24.2		23.3		24.9		23.7		21.9		20.2		19.8		20.4		41			***	67.1292		30			***	431.287		-0.0018	***	-2		1011.6		0.7
1983-09-02	24.2		28.8		20.3		24.3		24.2		23.7		24.6		23.7		22.2		19.3		19		19.6		0			***	166.666		91			***	414.284		0.0197		0		1010.7		0.99
1983-09-03	25.2		30.3		21.4		25.3		25.2		24.2		25		23.6		22		20.3		19.9		20.5		0			***	155.092		82			***	423.218		0.0216		2		1012.2		0.76
1983-09-04	25.8		31.4		22.1		26		25.8		24.7		25.4		23.6		22		21.1		20.7		21.5		0			***	156.249		86			***	427.507		0.0252		3		1013.8		0.68
1983-09-05	26.5		31.7		22.3		26.8		26.5		25		25.7		23.7		21.9		21.1		20.7		21.5		0			***		***	88			***		***	0.0207	***	3		1013.4		0.58
1983-09-06	27.2		32.5		22.8		27.8		27.6		25.4		26		23.8		21.8		20.8		20.5		21.2		0			***	188.656		101			***	429.406		0.0208		2		1011.4		0.73	***
1983-09-07	24.7		31.2		20.8		25.1		24.9		24		25.4		24		22		20.5		20		20.7		57			***	142.36		78			***	422.216		0.0546	***	-2		1008.7		0.75
1983-09-08	21.4		23		20.7		21.7		21.4		21.9		23.7		24		22.9		18.4		18.4		19.2		31.5			***	35.8794		13			***	421.913		0.0264	***	-5		1008		0.77
1983-09-09	21.2		24.4		19.5		21.4		21		21.7		23.2		23.7		23		15.8		15.6		16.3		0			***	172.453		99			***	390.61		0.0151		-5		1007.5		1.48
1983-09-10	21.5		24.6		19.2		21.5		21.3		21.4		22.9		23.5		22.8		16.2		15.9		16.7		0			***	86.805		48			***	410.361		0.013		-2		1007.1		0.78
1983-09-11	22.5		24.6		21.2		22.3		22.4		21.9		23.1		23.3		22.7		18.6		18.3		19.1		0.5			***	52.083		28			***	424.725		0.0032		0		1005.1		0.94
1983-09-12	24.4		28.4		22		24.2		24.3		22.9		23.7		23.2		22.5		20.5		20.2		21.1		0			***	96.0642		56			***	428.036		0.0143		4		1000.6		0.72
1983-09-13	24.5		30.3		19.6		24.7		25.1		23.1		24.2		23.2		22.4		15.4		15.2		16.4		0			***	216.434		108			***	397.748		0.0195		-2		1003.6		1.11
1983-09-14	21.6		25.9		17.6		21.5		21.8		21.7		23.3		23.3		22.3		14		13.9		15		0			***	152.777		79			***	393.491		0.0166		-3		1007.8		0.9
1983-09-15	19		20.2		17.5		18.8		18.9		20.2		22.4		23.2		22.2		15.1		15		16		11			***	19.6758		8			***	411.235		-0.0036	*	-7		1008.8		0.99
1983-09-16		***	19.2	***		***		***		***		***		***		***		***	9.4	***	9.1	***	9.4	***	11.5	***		***	6.9444	***	0	***		***		***	0.0109	***	-6	***		***	0.79
1983-09-17	19.8		25.7		14.9		19.6		19.8		19.6		21.3		22.5		22.2		13.9		13.8		14		0.5			***	197.915		101			***	373.512		0.0256		-3		1008.4		1.39	***
1983-09-18	18.9		21.1		16.3		18.8		18.9		19.1		21		22.2		22.1		12.8		12.8		13.1		0			***	70.6014		34			***	396.97		0.005		-5		1014		1.05
1983-09-19	19.1		22		15.7		19.1		19.2		19.1		20.8		22		21.9		13.3		13.3		13.7		0			***	96.0642		52			***	391.92		0.0098		-3		1017.4		0.84
1983-09-20	20.1		22.7		17.2		20		20.2		19.6		21.1		21.8		21.7		15.5		15.6		16.1		0.5			***	65.9718		31			***	405.938		0.0077		0		1014.6		0.47
1983-09-21	20.2		22.3		18.8		20		20		19.9		21.3		21.7		21.6		16.5		16.4		16.7		0.5			***	57.87		34			***	408.785		0.0001	*	-1		1010.5		1.04
1983-09-22	20.8		24.9		17.6		20.7		20.7		20.2		21.5		21.7		21.5		17.4		17.4		17.9		17.5			***	69.444		39			***	409.817		0.0235	***	0		1005.9		0.96
1983-09-23	18.9		23.4		14.5		19.1		19.3		19.3		21.1		21.6		21.4		13.4		13.2		13.5		0.5			***	179.397		91			***	370.679		0.0158		-5		1013.2		1.08
1983-09-24	17.6		18.1		17.2		17.4		17.4		18.5		20.5		21.5		21.3		14.5		14.6		15.1		17			***	34.722		20			***	399.155		0.0012	***	-4		1007.2		0.96
1983-09-25	19.7		22.6		17.1		19.6		19.7		19.2		20.5		21.3		21.3		16.1		16.1		16.6		1			***	71.7588		38			***	402.078		0.013		1		1007.3		0.64
1983-09-26	19.2		21.2		16.8		19.2		19.4		19		20.6		21.1		21.2		14.5		14.5		14.9		1			***	63.657		28			***	400.367		0.0018		-3		1013.9		0.93
1983-09-27	16.1		18.3		14.9		16.1		16.4		17.5		19.8		21.1		21.1		12.8		12.9		13.4		15			***	32.4072		16			***	391.073		0.0031		-6		1015.3		0.57
1983-09-28	15.6		16.5		15		15.4		15.4		16.1		18.6		20.8		21		12.5		12.4		12.8		67			***	24.3054		14			***	390.482			***	-7		1004.5		0.86
1983-09-29	16.7		20.8		13.9		16.6		16.6		16.2		18		20.1		20.5		7.9		8.1		8.9		8			***	193.286		101			***	346.437		0.019	***	-5		1008.9		0.62
1983-09-30	16.7		20.5		13		17		17.3		16.3		18.1		19.8		20.3		9.4		9.6		10.4		0			***	126.157		59			***	365.95		0.0071		-3		1016.5		0.17
1983-10-01	19.5		25.9		14.2		19.6		19.8		17.7		18.8		19.6		20.3		12.1		12.3		13		1			***	177.082		81			***	369.92		0.0109		2		1012.4		0.32
1983-10-02	19		23.1		15.6		19.1		19.4		18.1		19.4		19.6		20.2		13		12.9		13.3		0			***	123.842		59			***	381.614		0.0059		-2		1014.4		0.26
1983-10-03	19.5		26		14.6		19.5		19.7		18		19.3		19.6		20.1		14.1		14		14.3		0			***	130.786		69			***	383.487		0.0047		1		1013.5		0.65
1983-10-04	20.5		23.5		17.5		20.3		20.3		19		20		19.7		20.1		15.6		15.6		16		0			***	82.1754		43			***	402.35		0.0106		2		1012.6		0.77
1983-10-05	20.8		24.9		15.4		21.1		21.3		19.6		20.6		19.8		20		15.4		15.6		16.4		6.5			***	104.166		48			***	397.893		0.0146		-1		1003.9		0.6
1983-10-06	17.3		21.7		13.7		17.4		17.7		17.5		19.5		20		20		7.9		8.3		9.4		0			***	143.518		65			***	360.567		0.0142		-6		1009.3		0.81
1983-10-07	16.5		21.9		11.8		16.7		16.9		16.7		18.9		19.9		19.9		8.4		8.4		9		0			***	165.508		67			***	350.756		0.0194		-8		1013.2		0.84
1983-10-08	15.8		18.5		13.9		15.7		15.8		15.8		18.1		19.7		19.9		9.8		10		10.6		2			***	52.083		23			***	381.767		-0.0047	*	-6		1020.8		0.95
1983-10-09	17.2		18.8		15		17		17		16.7		18.2		19.5		19.9		14.7		14.6		15.1		15			***	35.8794		19			***	395.657		0.0145	*	0		1012.5		0.8
1983-10-10	19.8		23.1		17.9		19.7		19.9		17.9		19		19.3		19.8		14.1		14.2		14.8		0			***	103.009		48			***	390.584		0.0059		1		1013.3		0.82
1983-10-11	17.6		22.1		12.9		18.1		18.3		17.4		19		19.3		19.7		13.1		13.2		13.9		21.5			***	31.2498		0			***	398.613		0.0033		-5		1005.9		0.73
1983-10-12	14.2		19.1		9.8		14.6		14.9		15		17.5		19.3		19.6		5.3		5.5		6.3		0			***	162.036		69			***	334.977		0.0178		-10		1015.6		0.76
1983-10-13	16.4		19.3		13.4		16.3		16.4		15.8		17.5		19		19.6		10.9		11		11.6		0			***	52.083		31			***	384.665		0.0113		-1		1011.5		0.54
1983-10-14	16.8		20.7		13		16.9		17.2		16.1		17.8		18.8		19.5		10.1		10.3		10.9		0.5			***	83.3328		35			***	376.204		0.0054		-4		1013.2		0.64
1983-10-15	15.4		19.2		11.6		15.7		15.9		14.8		17		18.8		19.4		7.2		7.4		8.1		0.5			***	93.7494		36			***	363.293		0.0065		-6		1018.5		0.76
1983-10-16	15.1		18.2		12.1		15.3		15.3		15.3		17.2		18.6		19.3		11.7		11.6		11.7		7.5			***	68.2866		40			***	372.702		0.0128		-4		1009.4		0.79
1983-10-17	15.6		21.3		12.1		16.1		16.6		15.3		17.1		18.4		19.3		11		11		11.3		0			***	121.527		64			***	358.522		0.0199		-4		1008.7		0.63
1983-10-18	14		16.9		11.1		14.2		14.4		14.2		16.6		18.3		19.2		5.6		5.8		6.4		0			***	122.684		56			***	344.439		0.0052		-8		1015.2		1.27
1983-10-19	12.2		14.2		10.8		12.3		12.4		13.2		15.7		18.1		19.1		7.2		7.5		8.2		20.5			***	26.6202		12			***	369.599		0.0014		-7		1016.4		0.68
1983-10-20	15.8		22.2		11.8		15.6		15.6		14.4		15.9		17.7		18.8		10		10.1		10.6		5.5			***	129.629		79			***	354.999		0.0203		1		1009.8		0.85
1983-10-21	13.8		15.4		12.6		13.7		13.6		14.1		16.1		17.5		18.7		9.2		9.2		9.5		3			***	20.8332		9			***	380.226		0.0015	***	-6		1015.3		1.24
1983-10-22	15.4		20.1		11.9		15.5		15.5		14.8		16.2		17.5		18.7		10.5		10.6		11.1		0.5			***	106.481		62			***	360.039		0.0224		0		1010.5		0.66
1983-10-23	13.8		16.8		9.3		13.9		14		14.2		16.3		17.4		18.6		7.5		7.7		8.1		2.5			***	61.3422		32			***	364.639		0.002		-7		1007.8		0.88
1983-10-24	10.5		17		3.2		11.2		11.5		12.6		15.3		17.4		18.5		2.1		2.6		3.3		0.5			***	145.832		64			***	314.403		0.025		-12		1011.3		0.62
1983-10-25	8.4		16.9		1.7		9.8		10.5		9.8		13.3		17.1		18.4		-0.4		-0.1		0.3		0			***	149.305		59			***	301.09		0.0256		-14		1018.2		0.85
1983-10-26	10.4		16.7		1.4		11		12.1		9.9		12.5		16.6		18.3		3.6		3.8		3.8		0			***	116.897		61			***	324.795		0.0174		-6		1022.2		0.66
1983-10-27	12.8		21		5.8		13.7		14.2		12		13.9		16.2		18.2		5.9		6.2		6.7		13			***	122.684		60			***	335.654		0.0333		-5		1011.5		0.91
1983-10-28	11.4		18.4		4.1		12.3		13.1		10.6		13		16		18.1		4.7		4.9		4.8		0			***	127.314		57			***	325.997		0.0189		-7		1017.6		0.62
1983-10-29	13.3		21		7.9		13.5		13.6		11.9		13.7		15.8		17.9		3.8		3.9		4.3		0			***	133.101		45			***	331.2		0.0182		-4		1012.2		0.9
1983-10-30	8.1		13.9		2.8		9.1		9.4		9.6		12.7		15.7		17.8		-3.8		-3.2		-1.8		0			***	142.36		48			***	296.611		0.0214		-13		1019.8		0.55
1983-10-31	8		14.3		1.5		8.6		9.1		8.6		11.5		15.4		17.6		1.4		1.7		1.7		0			***	109.953		43			***	312.582		0.016		-10		1017.8		0.64
1983-11-01	10.3		17.5		2.6		10.6		10.7		9.4		11.7		15		17.5		4.2		4.2		4.2		0			***	124.999		51			***	319.553		0.013		-5		1012.4		0.96
1983-11-02	12.4		17.9		8		12.5		12.8		11.1		12.6		14.8		17.4		5.8		5.8		5.9		0			***	129.629		47			***	328.879		0.0224		-2		1014.2		0.69
1983-11-03	11.6		18.4		5		12.7		13.4		10.4		12.5		14.7		17.2		7		7		6.6		0			***	101.851		50			***	335.946		0.0192		-6		1015.9		0.45
1983-11-04	12		15.6		7.9		12.3		12.8		10.6		12.5		14.7		17.1		7		7		7		0			***	45.1386		16			***	359.344		-0.0012		-3		1018.3		0.85
1983-11-05	13.2		16.7		10.4		13.2		13.3		11.6		13.1		14.6		17		6.5		6.7		7.1		0			***	61.3422		25			***	358.31		0.0037		-1		1017.5		0.97
1983-11-06	11.3		12.3		10.7		11.5		11.4		11.2		13.2		14.7		16.8		7		7.4		7.6		14			***	11.574		4			***	369.681		-0.0013		-4		1010.9		1.25
1983-11-07	11.4		15		8.4		11.7		11.8		11		13		14.6		16.7		5.6		5.9		6.1		9			***	55.5552		22			***	350.761		0.0065		-5		1009.5		1.2
1983-11-08	10.1		16.9		3.7		11		11.5		9.5		12.1		14.5		16.5		4		4		3.8		0			***	121.527		48			***	316.843		0.0221		-9		1016.6		0.59
1983-11-09	11.1		17.1		4		11.6		11.8		9.4		11.6		14.3		16.5		4.9		4.9		4.8		0.5			***	100.694		52			***	329.988		0.0097		-3		1020.3		1.16
1983-11-10	12.7		15.1		9.7		12.8		12.9		11.1		12.5		14.1		16.4		9.3		9.5		9.7		6			***	38.1942		20			***	365.645		0.0055		0		1012		1.13
1983-11-11	14.3		20		11		14.6		14.8		12.1		13.4		14.1		16.3		9		9		9.3		0			***	105.323		51			***	346.59		0.0189		0		1002.2		0.67
1983-11-12	11.1		18.6		5.5		11.6		12		11		13		14.2		16.2		6.3		6.1		5.9		0			***	69.444		22			***	342.573		0.0096		-7		999.1		0.65
1983-11-13	8.7		15.4		2		9.1		9.4		9		11.9		14.2		16.1		-0.9		-0.7		-0.5		0			***	119.212		41			***	304.15		0.0186		-11		1002.2		1.12
1983-11-14	8.7		16		1.1		9.7		10		7.8		10.7		14		16		-1.1		-0.9		-0.7		0			***	120.37		24			***	303.156		0.0215		-9		1012.3		0.87
1983-11-15	7.5		12.4		2.2		7.7		7.9		7.4		10.1		13.6		16		2.2		2.2		2.3		0			***	38.1942		13			***	336.69		0.0048		-7		1016.2		0.7
1983-11-16	11.3		17		6		11.3		11.3		9.6		11.1		13.3		15.9		5.2		5.1		5.2		0			***	107.638		35			***	325.64		0.0181		0		1011.4		0.95
1983-11-17	11.5		20.3		5.4		11.9		12.1		9.5		11.4		13.3		15.8		3		2.8		2.8		0			***	92.592		23			***	330.273		0.0137		-4		1001.3		1.62
1983-11-18	9.5		14.8		5.5		9.8		10		7.9		10.7		13.3		15.7		-5.4		-5.2		-4.8		0			***	111.11		5			***	304.934		0.013		-9		1001.7		1.52
1983-11-19	9.8		16.3		3.9		10.5		10.8		7.6		10.2		13.1		15.6		-3.7		-3.5		-3.4		0			***	118.055		14			***	304.064		0.0148		-8		1013.5		1.94
1983-11-20	7.1		14.2		1.7		8.5		9.2		6.6		9.5		12.9		15.5		0.9		0.9		0.7		0			***	82.1754		27			***	312.456		0.0163		-10		1019.1		0.52
1983-11-21	6.3		15.3		0.3		8		9		5.8		8.9		12.6		15.4		0.9		0.8		0.2		0			***	105.323		43			***	298.319		0.0206		-12		1016.6		0.59
1983-11-22	5.6		12.9		-2		6.2		6.5		5.3		8.4		12.3		15.3		-4.8		-4.7		-4.6		0			***	109.953		28			***	287.893		0.0121		-11		1018.7		1.09
1983-11-23	4.5		11.6		-2.8		5.1		5.4		4.1		7.3		12		15.1		-4.7		-4.5		-4.3		0			***	109.953		28			***	283.075		0.0228		-10		1021.6		0.63
1983-11-24	8		15.3		3.8		9		9.5		6.4		8.3		11.6		15		5.1		4.9		4.3		16			***	63.657		36			***	326.648		0.0295	*	-3		1004.7		0.85
1983-11-25	7.5		14.1		1.4		8.6		9		5.8		8.1		11.4		14.8		0.2		0.4		0.5		0			***	82.1754		29			***	311.961		0.0123		-5		1005.7		0.72
1983-11-26	6.7		12.1		2.2		6.7		6.7		6.6		8.7		11.3		14.7		-1.7		-1.7		-1.5		0			***	77.5458		10			***	309.036		0.0143		-5		1005.7		0.97
1983-11-27	4.7		9.5		-2.3		5		5		4.8		7.8		11.2		14.5		-7.7		-7.5		-7.4		0			***	112.268		2			***	278.84		0.0213		-10		1015		1.83
1983-11-28	2.9		9.9		-2.6		4.9		5.5		3.4		6.8		11		14.3		-5.8		-5.7		-5.7		0			***	107.638		13			***	274.929		0.0209		-14		1025		0.5
1983-11-29	1.9		11.1		-4.9		3.3		4.1		2.2		5.7		10.7		14.2		-2.7		-2.9		-3.5		0.5			***	97.2216		33			***	277.83		0.0208		-13		1026.5		0.5
1983-11-30	6.1		14.1		-2.7		6.5		6.8		3.8		6		10.3		14.1		1.1		0.8		0.7		0			***	77.5458		35			***	307.248		0.0157		-3		1008.9		0.77
1983-12-01	8.5		12.2		1.6		8.8		9.1		5		7.1		10		13.9		-4.9		-4.8		-4.8		0			***	106.481		5			***	297.702		0.0202		-3		1002.4		2.18
1983-12-02	5.6		14.4		-1.3		8.1		9.1		4.2		6.9		10		13.8		-1.1		-1.4		-2.2		0			***	89.1198		13			***	297.121		0.0139		-8		1006.2		0.67
1983-12-03	6.7		16.4		-1.4		7.8		8.4		4.1		6.5		9.9		13.6		-2.8		-2.8		-3.4		0			***	90.2772		14			***	299.54		0.021		-4		1003.7		1.08
1983-12-04	5.1		10.6		-1.1		6.2		6.4		4		6.7		9.8		13.5		-7		-6.9		-6.8		0			***	103.009		4			***	282.869		0.0182		-8		1010.2		1.49
1983-12-05	4.8		11.9		-1.9		5.6		6		3.6		6.2		9.7		13.3		-2.9		-2.8		-2.7		0			***	92.592		19			***	289.713		0.0139		-4		1008.4		0.65
1983-12-06	4.6		10.6		-2.1		5.8		6.2		3.7		6.4		9.5		13.2		-5.3		-5.3		-5.3		0			***	97.2216		3			***	284.396		0.0157		-7		1012.7		0.86
1983-12-07	2		10.8		-5.2		3.9		4.6		2		5.4		9.4		13.1		-4.8		-4.9		-5.1		0			***	100.694		14			***	272.309		0.0189		-2	***	1017.5		0.49
1983-12-08	3.5		11.9		-1		5.4		5.8		2.8		5.4		9.1		13		-3.4		-3.4		-3.4		0			***	65.9718		4			***	297.132		0.0116		1	***	1013.6		0.65
1983-12-09	3.8		11.6		-3.6		5.5		6.7		2.3		5.4		9		12.8		-1.9		-2.2		-2.9		0			***	94.9068		16			***	284.285		0.009		0	***	1016.7		0.57
1983-12-10	5.6		14.1		-1.1		6.4		6.8		2.9		5.6		8.8		12.7		-0.5		-0.8		-1.2		0			***	89.1198		14			***	295.628		0.0069		-3	***	1015.2		0.84
1983-12-11	6.1		10.9		0.9		6.4		7		3.7		6		8.7		12.5		-0.1		-0.4		-0.5		0			***	25.4628		-11			***	332.914		0.0066		0	***	999.9		1.17
1983-12-12	5.6		10.9		-0.7		6.3		6.5		2.9		5.9		8.7		12.4		-6.1		-6		-6		0			***	99.5364		-9			***	285.031		0.017		-4	***	1010.1		1.84
1983-12-13	2.4		11.3		-2.7		4.3		5.6		1.9		5.1		8.6		12.3		-3.4		-3.6		-4.3		0			***	91.4346		5			***	278.198		0.0134		-11	***	1016		0.6
1983-12-14	5.1		12.1		-2.1		6.4		7.3		2.7		5.2		8.5		12.2		-2.4		-2.3		-2.4		0			***	65.9718		7			***	303.58		0.0049		-4	***	1009.7		0.9
1983-12-15	3		8		-0.8		3.8		4.1		3.1		5.7		8.3		12.1		-5.1		-5		-4.9		0			***	74.0736		0			***	288.283		0.0086		-5	***	1009.5		0.57
1983-12-16	2.2		10		-3.2		3.6		4.1		1.6		4.9		8.3		12		-6.8		-6.7		-6.6		0			***	92.592		-6			***	273.752		0.0107		-7	***	1009.1		1.12
1983-12-17	1.1		6.3		-4.5		1.4		1.6		1.6		4.6		8.1		11.9		-5.2		-5.2		-5.3		0			***	81.018		6			***	276.35		0.0081		-5	***	1008.3		1.43
1983-12-18	0.4		5.3		-5.2		1.2		1.5		1.3		4.5		7.9		11.8		-8.4		-8.3		-8.4		0			***	99.5364		-6			***	261.726		0.0182		-7	***	1009.7		1.21
1983-12-19	0		8.9		-6.8		1.9		2.6		-0.1		3.6		7.7		11.7		-8.3		-8.3		-8.6		0			***	96.0642		-6			***	261.935		0.011		-8	***	1009		1.88
1983-12-20	1.6		6.6		-3.6		2		2.3		0.3		3.5		7.5		11.6		-8.7		-8.6		-8.8		0			***	91.4346		-15			***	270.323		0.0107		-6	***	1013.3		1.24
1983-12-21	-1.4		7.5		-8.2		0.9		2.5		-0.6		3		7.3		11.5		-9.5		-9.4		-9.9		0			***	98.379		-7			***	254.607		0.0111		-7	***	1022			***
1983-12-22	2.7		9.9		-4.2		2.9		3.3		1.1		3.2		7		11.3		-3.3		-3.2		-3.6		0.5			***	52.083		7			***	299.84		0.0067		-2	***	1013		0.89
1983-12-23	5.7		11.7		1.2		5.6		5.7		3.8		5.1		6.9		11.2		-1.9		-1.7		-1.8		2			***	49.7682		-6			***	315.029		0.0061		1	***	1001.2		1.1
1983-12-24	1.7		4.6		-3.6		2		2.1		1.5		4.2		7		11.1		-7.5		-7.5		-7.5		0			***	54.3978		-6			***	292.364		0.0035		-5	***	1013		0.94
1983-12-25	1.6		7.7		-3.4		1.7		1.9		1.3		4.1		7		10.9		-8.1		-8		-8.2		0			***	103.009		-14			***	264.057		0.0141		-6	***	1009.2		1.44
1983-12-26	-0.3		6.1		-6.1		0.5		1		-0.1		3.3		6.9		10.8		-11		-10.8		-11		0			***	106.481		-12			***	253.141		0.0127		-7	***	1012.2		1.37
1983-12-27	-2.3		6.2		-8.7		-0.2		1		-0.9		2.6		6.7		10.8		-10.8		-10.6		-10.7		0			***	106.481		-7			***	245.954		0.0106		-6	***	1015.5			***
1983-12-28	-0.2		7		-6.9		0.4		0.9		-1		2.3		6.5		10.7		-6.6		-6.7		-7.1		0			***	93.7494		-1			***	263.025		0.0074		-6	***	1014.4		1.13
1983-12-29	0.2		7.5		-5		1.5		2.1		0.4		2.8		6.2		10.5		-6.5		-6.6		-6.9		0			***	92.592		-5			***	265.263		0.012		-3	***	1014.3		0.59
1983-12-30	-0.3		4.4		-5.7		0.2		0.6		0		2.6		6.1		10.4		-5.3		-5.6		-5.8		0			***	39.3516		-4			***	293.509		0.0039		-5	***	1010.8		0.57
1983-12-31	1.8		8.4		-4.4		2.8		3.4		1.3		3.3		6		10.3		-4.6		-4.5		-4.9		0			***	79.8606		16			***	279.62		0.0109		-2	***	1006.7		0.88
1984-01-01	-0.4		8.4		-6.5		1.9		3		-0.2		2.9		6		10.2		-7.5		-7.5		-8.1		0			***	112.268		20			***	252.427		0.012		-5	***	1012.7		0.69
1984-01-02	0		8.1		-6.9		1.3		2.2		-0.2		2.6		5.9		10.1		-6		-6.2		-6.8		0			***	91.4346		0			***	265.669		0.0094		-5	***	1015.7		0.6
1984-01-03	1.5		8.9		-4.9		1.8		2		0.7		2.7		5.8		10		-2.1		-2.3		-2.7		4			***	71.7588		14			***	284.626		0.0089	***	-3	***	1009.2		1
1984-01-04	3.4		8.8		-1.4		3.8		4		2.5		4		5.8		9.9		-2.6		-2.5		-2.5		1.5			***	98.379		11			***	278.259		0.0367	***	0	***	1004.2		1.06
1984-01-05	0.3		6.7		-5.5		1.6		2.2		0.7		3.4		5.9		9.8		-8		-7.8		-7.7		0			***	109.953		-8			***	256.274		0.0138			***	1009		0.79
1984-01-06	0.4		7.1		-6.4		1.6		2.1		0.1		2.9		5.9		9.7		-9.8		-9.6		-9.5		0			***	111.11		-6			***	255.037		0.0111		-5	***	1013.9		1.28
1984-01-07	-0.4		7.4		-6.1		1.1		1.7		-0.1		2.6		5.8		9.6		-8.7		-8.7		-8.7		0			***	109.953		-3			***	253.538		0.0151		-4	***	1010.7		0.62
1984-01-08	-2.3		4.9		-8		-0.8		0.3		-0.5		2.3		5.6		9.6		-9.9		-9.7		-10		0			***	109.953		-5			***	245.937		0.0129		-5	***	1009.3		0.52
1984-01-09	-0.9		8.1		-6.1		0.7		1.7		-0.6		2.1		5.5		9.5		-8		-8		-8.2		0			***	105.323		-4			***	254.775		0.0112		-5	***	1004.3		0.77
1984-01-10	0.8		10.2		-5.7		2.4		3.3		-0.3		2.2		5.3		9.4		-5.2		-5.4		-6.4		0			***	106.481		1			***	262.793		0.0093		-4	***	1003.2		0.75
1984-01-11	2.1		7.4		-1.8		2.7		3		0.1		2.3		5.2		9.3		-9		-8.8		-9		0			***	112.268		-4			***	262.38		0.0115		-4	***	1004.2		0.94
1984-01-12	-1.2		5.7		-6.4		0.5		1		-0.5		2.1		5.1		9.2		-10.3		-10.3		-10.4		0			***	111.11		-7			***	250.072		0.0114		-5	***	1010.7		0.64
1984-01-13	-0.9		7.4		-7.5		0.6		1.8		-0.8		1.9		5		9.1		-9.8		-9.4		-9.7		0			***	115.74		0			***	249.492		0.0127		-6	***	1010		0.74
1984-01-14	0.6		7.1		-4.2		1.4		1.9		0		2		4.9		9.1		-3.8		-3.9		-5		0			***	72.9162		12			***	280.856		0.0083		-3	***	1011.8		0.75
1984-01-15	1.9		10.5		-4.4		3		4.2		0.3		2.2		4.9		9		-3.3		-3.6		-4.2		0			***	87.9624		19			***	279.015		0.0121		-3	***	1006.5		0.72
1984-01-16	1.4		4.2		-2.9		1.5		1.7		0.8		2.7		4.8		8.9		-10.8		-10.7		-10.9		0			***	97.2216		4			***	267.8		0.0148		-2	***	1004.3		0.98
1984-01-17	-0.1		5.3		-7.2		0		0.5		-0.4		2.1		4.9		8.8		-12.7		-12.5		-12.8		0			***	113.425		-15			***	252.969		0.0155		-4	***	1007.8		1.56
1984-01-18	0.4		6.4		-3.9		0.9		1.2		-0.6		1.8		4.8		8.7		-11.9		-11.9		-12.2		0			***	120.37		-2			***	252.267		0.0147		-4	***	1011.9		1.43
1984-01-19	-1.4		-0.6		-2.6		-1.3		-1.4		-0.4		1.7		4.7		8.7		-4.7		-4.8		-5.4	*	2			***	23.148		-4	***		***	299.618		0.0391	***	-3	***	1010	*	0.96
1984-01-20	-5.3		0.4			***	-3.8		-2.2		0.2		1.9		4.6		8.6		-9.2		-9.2		-10		6.5			***	136.573			***		***	227.385		0.0151	***	-3	***	1014.4		1.06
1984-01-21		***		***		***		***		***		***		***		***		***		***		***		***	0.5			***		***		***		***		***		***		***		***	0.6708	***
1984-01-22		***		***		***		***		***		***		***		***		***		***		***		***	0	***		***		***		***		***		***		***		***		***	1.3172
1984-01-23		***		***		***		***		***		***		***		***		***		***		***		***	0	***		***		***		***		***		***		***		***		***	0.7516	***
1984-01-24		***		***		***		***		***		***		***		***		***		***		***		***	0	***		***		***		***		***		***		***		***		***	0.4284	***
1984-01-25		***		***		***		***		***		***		***		***		***		***		***		***	0	***		***		***		***		***		***		***		***		***	0.4688	***
1984-01-26		***		***		***		***		***		***		***		***		***		***		***		***	0	***		***		***		***		***		***		***		***		***	0.9536	***
1984-01-27		***		***		***		***		***		***		***		***		***		***		***		***	0	***		***		***		***		***		***		***		***		***	1.0748	***
1984-01-28		***		***		***		***		***		***		***		***		***		***		***		***	0	***		***		***		***		***		***		***		***		***	0.4284	***
1984-01-29		***		***		***		***		***		***		***		***		***		***		***		***	0	***		***		***		***		***		***		***		***		***	1.6	***
1984-01-30		***		***		***		***		***		***		***		***		***		***		***		***	0	***		***		***		***		***		***		***		***		***	0.4688	***
1984-01-31		***		***		***		***		***		***		***		***		***		***		***		***	0	***		***		***		***		***		***		***		***		***	1.0344	***
1984-02-01	1.3	*	6.4	*	-2.9	*	2.4	*	3.2	*	-0.5	*	1.4	*	3.9	*	7.7	*	-4	*	-3.3	*	-3.6	*	6.5	*		***	149.305	*	6	*		***	255.363		-0.0082	***	-3	***	1012.7	*	1.48	***
1984-02-02	-0.4		7.2		-5.1		0.9		1.8		-0.3		1.5		3.9		7.6		-5.5		-5.5		-5.7		0			***	115.74		13			***	261.742		0.0042		-2	***	1010.8		0.59	***
1984-02-03	-0.4		4.6		-4.3		0.2		1		-0.3		1.5		3.8		7.5		-9.5		-9.2		-9.2		0			***	104.166		4			***	264.776		0.0109		-2	***	1007.9		1.12
1984-02-04	-2.9		1.8		-7		-2.2		-2		-0.5		1.4		3.8		7.4		-14.2		-13.9		-13.3		0			***	153.934		11			***	232.1		0.0184		-3	***	1014.8		1.31
1984-02-05	-3		2.9		-10.2		-2.5		-2.1		-0.9		1.2		3.7		7.3		-10.9		-10.7		-10.8		0			***	118.055		5			***	248.986		0.0096		-3	***	1010.3		0.73
1984-02-06	-1		1.5		-5.3		-0.9		-0.7		-0.8		1.1		3.7		7.3		-11		-10.9		-10.8		0			***	94.9068		5			***	267.033		0.0099		-2	***	1000.4		1.01
1984-02-07	-2.5		1.4		-7.5		-2.6		-2.5		-1		1.1		3.6		7.2		-14.5		-14		-14		0			***	149.305		2			***	236.65		0.0222		-3	***	1000		1.76
1984-02-08	-2.9		3.2		-10		-2.2		-1.4		-1.3		0.9		3.6		7.2		-14.7		-14.4		-14.4		0			***	158.564		11			***	232.037		0.0142		-5	***	1002.7		1.09
1984-02-09	-2.5		3.7		-11.3		-1.9		-1.1		-1.5		0.7		3.5		7.2		-12.1		-11.7		-12.1		0			***	151.619		10			***	238.395		0.018		-4	***	1006		2.68
1984-02-10	-0.6		4.7		-7.2		-0.5		-0.2		-1.4		0.6		3.4		7.1		-11		-10.6		-10.9		0			***	166.666		19			***	240.766		0.0189		-3	***	1014.9		1.73
1984-02-11	0.2		5.7		-4.1		0.7		1.1		-1.1		0.7		3.3		7.1		-9.5		-9.4		-9.7		0			***	152.777		19			***	250.74		0.0149		-2	***	1021.8		0.56
1984-02-12	-0.2		4.2		-4.7		-0.1		-0.1		-0.9		0.8		3.3		7		-5.3		-5.2		-5.6		0			***	61.3422		17			***	289.738		0.0276	*	-1	***	1019.8		1.18
1984-02-13	0.9		4.1		-1.9		1.6		1.9		-0.7		0.9		3.3		7		-2.4		-2.1		-2.8			***		***	98.379		8			***	280.561		0.0159	***	0	***	1012		1
1984-02-14	1.5		5		-1.7		1.5		1.6		-0.7		1.1		3.3		6.9		-4.6	*	-7	***	-5.8	*		***		***	99.5364		30			***	281.484		0.001		0	***	1010.2		1.26
1984-02-15	1.5		6		-3.4		1.4		1.4		-0.1		1.7		3.2		6.8		-9.9		-11.9	***	-10			***		***	146.99		36			***	259.571		0.0141		0	***	1009.2		1.23
1984-02-16	-0.5		5		-6.4		0.2		0.5		0.5		2		3.3		6.8		-13.8		-12.5	***	-12.2			***		***	170.138		26			***	241.354		0.0187		0	***	1012.8		1.27
1984-02-17	-0.5		3.3		-3.5		-0.6		-0.6		0.2		1.7		3.3		6.8		-7.9		-6	***	-6.8			***		***	53.2404		19			***	292.453		0.0091		0	***	1011.2		0.86
1984-02-18	-0.6		2.5		-4.7		-0.3		-0.1		0.5		1.8		3.3		6.7		-6.8		-2.1	***	-5.8			***		***	190.971			***		***	240.249		-0.0288	***	0	***	1008.9		1.07
1984-02-19	0.1		5.4		-4.9		0.5		0.9		0.2		1.6		3.4		6.7		-11.6		-7.4	***	-10.9			***		***	182.869			***		***	242.264		0.0016		0	***	1016.2		1.04
1984-02-20	-2		3.5		-7.5		-1.1		-0.3		-0.2		1.5		3.4		6.7		-8.4		-4.6	***	-8.5			***		***	113.425			***		***	262.451		0.001		-1	***	1016.6		0.66
1984-02-21	0		6.3		-6.7		0.4		1		-0.4		1.3		3.4		6.6		-6.2		-2.5	***	-6.4			***		***	159.721		4			***	255.192		-0.0014		-2	***	1016		0.94
1984-02-22	1.2		6.7		-4.9		1.4		1.8		-0.3		1.2		3.3		6.6		-6.2		-2.2	***	-6.1		0			***	134.258		20			***	269.357		0.0001		-2	***	1020.2		1.23
1984-02-23	1.2		2.2		0.2		1.1		1.1		0		1.3		3.3		6.4		-3.6		-0.1	***	-3.2		11			***	24.3054		2			***	314.407		0.0338	***	-2	***	1011.7		1.41
1984-02-24	3.3		8.6		-2.4		4		4.5		1.8		2.3		3.1		5.7		-5.3		-3.7	***	-4.5		0			***	158.564		53			***	270.401		0.008	*	-1	***	1011.6		0.96
1984-02-25	0.3		4.9		-4.6		0.8		1.4		0.8		2.4		3.2		5.8		-6.4		-2.7	***	-6.1		0			***	89.1198		3			***	283.732		0.0042		-2	***	1020.1		0.66
1984-02-26	1.1		2.8		-0.2		0.8		0.9		0.4		2		3.3		5.7		-2.9		2.5	***	-2.5		22			***	21.9906		5			***	315.264		0.0237	***	-2	***	1007.7		1.24
1984-02-27	3.8		8.2		0.6		3.9		4.1		1.7		2.6		3.2		5		-6.9		-6.3		-6		0			***	195.601		61			***	259.791		0.027	***	1	***	996.1		2.16
1984-02-28	1.4		5.1		-2.2		1.1		1.2		1.2		2.7		3.3		5.1		-9.8		-9		-9.7		0			***	193.286		38			***	249.997		0.0242		-3		1005.7		2.23
1984-02-29	0.4		5.8		-6		0.5		0.7		1		2.5		3.4		5.3		-10.2		-9.6		-10.5		0			***	165.508		24			***	255.893		0.0164		-2		1007.1		1.37
1984-03-01	0.6		6.3		-6.8		0.7		0.9		1.4		2.7		3.4		5.5		-9.2		-8.3	***	-9.8		0			***	187.499		38			***	250.634		0.0187		-1		1011.3		0.98
1984-03-02	2.6		10.1		-5		3.1		3.5		2		3.1		3.5		5.6		-6		-4.7	***	-7.1		0			***	181.712		35			***	263.049		0.0136		0		1012.4		1.08
1984-03-03	2.8		10.3		-3.2		3		3.2		2.9		3.6		3.6		5.7		-5.7		-3.3	***	-6.4		4.5			***	157.406		57			***	272.507		0.0126	*	0		1012.4		1.16
1984-03-04	2.9		7.8		-1.5		2.5		2.5		4.2		4.5		3.8		5.8		-4.1		-1	***	-4.5		0.5			***	175.925		58			***	268.756		0.0074	***	2		1013.8		1.02
1984-03-05	2.4		8.1		-2.9		1.9		1.9		5		5.4		4.1		5.9		-5.7		-2.4	***	-5.6		0.5			***	200.23		62			***	258.403		0.0204		1		1014.4		1.09
1984-03-06	2.5		9.2		-4.5		2.7		3	*	3.9	*	5	*	4.4	*	5.9	*	-7.9		-4.6	***	-8.4		0			***	195.601		53			***	258.871		0.007	***	-1		1013		0.25
1984-03-07	1.4	***	8.8	***	-5.6	***	1.7	***	2.1	***	2.8	***	4.3	***	4.2	***	5.5	***	-8.7		-6.6	***	-9.2		0			***	189.814		43			***	256.456		0.0023	***	6	*	1012.4		0.55	***
1984-03-08	2.8		8.9		-3.4		2.8		3.1		3.8		4.9		4.7		6.2		-6.7		-6.2	***	-7.5		0			***	174.767		34			***	268.507		0.0195		-1		1011.6		0.93	***
1984-03-09	2.7		8.5		-2.8		2.7		2.9		3.7		4.8		4.8		6.3		-6.6		-5.6	***	-7.3		0			***	153.934		26			***	275.369		0.0144		-1		1014.1		1.22
1984-03-10	2.9		5.7		0.9		2.5		2.4		3.7		4.7		4.9		6.4		-2.9		-1	***	-3.5		3			***	41.6664		10			***	317.248		0.0027	*	-2		1003.8		1.21
1984-03-11	3.4		7.4		-1.2		3.1		3.3		3.2		4.5		5		6.5		-10		-8.7	***	-10.2		0			***	204.86		43			***	260.254		0.0239		-3		1001.6		2.5	*
1984-03-12	3.5		12.1		-5.7		4		4.4		3.2		4.2		5		6.5		-7.8		-6.6	***	-8.4		0			***	164.351		24			***	275.629		0.0149		-1		1007.5		1.78
1984-03-13	3.2		8.8		-2.7		2.8		2.9		2.9		4.2		5		6.6		-9.6		-8.5	***	-10.1		0			***	174.767		29			***	270.422		0.016		-2		1012.9		1.9
1984-03-14	0.6		3.1		-0.5		0.1		0.1		2.2		3.8		5		6.6		-6.2		-3.9	***	-6.7		0			***	33.5646		1			***	309.742		-0.0026	***	-3		1014.8		0.6304
1984-03-15	2.9		7.7		-2.8		2.5		2.6		4		4.5		4.9		6.7		-6.4		-2.8	***	-6.8		1			***	201.388		62			***	264.496		0.0131		3		1017.4		1	***
1984-03-16	2.1		3		0.5		1.7		1.6	*	2.7	*	4.5	*	4.9	*	6.6	*	-2		1.2	***	-2.6		14			***	26.6202		12			***	319.744		-0.0139	***	-3		1010		1.15
1984-03-17	5.8		11.3		2.5		5.4		5.4		4.5		5.2		5.1		6.7		-2		0.6	***	-2.4		0			***	101.851		29			***	311.093			***	4		998.5		1.24
1984-03-18	5.9		11.2		0.2		5.7		5.9		3.8		5.3		5.2		6.7		-8.1		-7	***	-8.3		0			***	224.536		58			***	269.191			***	-2		1007.1		2.32	***
1984-03-19	2.2		4.9		0.6		1.9		1.9		2.4		4.5		5.3		6.7		-5.2		-4.7	***	-5.7		0.5			***	40.509		9			***	315.182			***	-3		1015.5		1.39
1984-03-20	1.4		2.8		-1.1		1.1		1.2		1.9		3.9		5.3		6.8		-1.4		-1.1	***	-2.3		17.5			***	57.87		4			***	306.623			***	-4		1004.4		1.39
1984-03-21	2.2		8.9		-4.2		2.2		2.7		2.8		4.2		5.1		6.6		-7.2		-6.1	***	-7.2		0			***	200.23		74			***	264.072			***	1		1004.4		2.61
1984-03-22		***		***		***		***		***		***		***		***		***		***		***		***	0	*		***		***		***		***		***		***		***		***	1.3172	***
1984-03-23	1.7		7.7		-3.8		1.7		1.8		3		4.6		5.1		6.7		-10.6		-9.5	***	-10.3		0			***	234.952		56			***	251.159			***	1		1022.4		1.24	*
1984-03-24	4.3		8.3		0.2		3.9		3.9		4.2		5.1		5.1		6.7		-2.9		-1.5	***	-3.1		1			***	82.1754		27			***	312.09			***	1		1016.4		0.71
1984-03-25	6.5		14.2		0.1		6.4		6.4		6		6.4		5.3		6.7		-4.6		-3.4	***	-5		0			***	201.388		64			***	284.626			***	2		1010.8		1.26
1984-03-26	5.5		13.1		-0.5		5.8		6.1		5.5		6.6		5.5		6.8		-5.5		-4	***	-5.8		0			***	172.453		45			***	288.595			***	0		1015		1.17
1984-03-27	5.5		11.8		-0.1		5.1		5		5.8		6.7		5.8		6.8		-3.5		-1.4	***	-4		0			***	177.082		57			***	289.243			***	3		1017.5		1.72
1984-03-28	3		5.9		-2.7		3.2		3.2		4.6		6.5		6		6.9		-2.2		0.1	***	-2.7		1			***	65.9718		14			***	312.232			***	-3		1013.6		1.48
1984-03-29	7		16.5		-3		7.2		7.6		5.8		6.4		6.1		7		-2.1		0.1	***	-2.5		0			***	202.545		67			***	290.415			***	3		1011.6		1.44
1984-03-30	10.6		18.4		2.6		10.3		10.2		8.4		8.2		6.2		7.1		1		3	***	0.3		0			***	199.073		48			***	310.342			***	6		1011.1		1.77
1984-03-31	5.7		15.7		0.7		5.5		5.6		7		8.4		6.5		7.2		-0.1		2.2	***	-0.7		1			***	141.203		50			***	303.923			***	-1		1011.1		2.64
1984-04-01	2.2		3.5		0.8		1.8		1.7		4.3		6.6		6.8		7.2		-1.8		1.1	***	-2.1		4			***	47.4534		21			***	314.866			***	-4		1017.2		1.89
1984-04-02	4.8		9.9		0.8		4.4		4.2		5.9		7.1		6.8		7.4		-3.5		-0.7	***	-3.6		0			***	225.693		84			***	275.669			***	3		1018.1		2.13
1984-04-03	4.4		8.5			***	4.9		5.1		5.8		7.1		6.8		7.5		-2.2		0.4	***	-2.8		0			***	97.2216		21			***	310.177			***	-1		1021.5		0.59
1984-04-04	10		17.9		0.1		10.1		10.4		8.4		8.1		6.9		7.5		2.3		4.7	***	1.2		0			***	189.814		70			***	313.304			***	7		1015.8		0.94
1984-04-05	12.1		13.9		10.7		11.9		11.8		10.1		9.9		7.1		7.6		8.6		11.2	***	8.2		14			***	46.296		29			***	365.852			***	5		999.4		1.37
1984-04-06	12.5		19.6		6.7		12.3		12.2		11.4		11.3		7.6		7.6		0		11.2	***	0.1		0.5			***	232.637		100			***	311.015			***	6		999.5		1.23
1984-04-07	6.6		10.2		3.6		6.4		6.3		8.7		10.2		8.1		7.7		-5.9		8	***	-5.9		0			***	164.351		53			***	299.218			***	-1		1014		1.56
1984-04-08	6.5		12.6		2.5		6		1.9		7.9		9.5		8.4		7.9		-3.9		1.7	***	-4.3		0			***	173.61		50			***	297.956			***	0		1019.8		1.55
1984-04-09	4.9		10.5		-2.4		5.2		0		7.6		9		8.4		8		-3.2		2	***	-4		0			***	196.758		55			***	286.126			***	0		1025.7		1.35
1984-04-10	8.7		13.8		3.8		8.7		0		9		9.5		8.4		8.2		1.9		7.1	***	1.2		0			***	104.166		29			***	331.169			***	3		1018		0.63
1984-04-11	10		15.1		5.6		9.9		5.9		9.9		10.2		8.5		8.3		4.3		9.5	***	3.6		0			***	97.2216		31			***	340.628			***	3		1010		1.07
1984-04-12	10.5		17.3		5.8		10.2		9.4		11.4		11.2		8.7		8.4		0.8		6.1	***	0.2		0			***	232.637		76			***	305.582			***	6		1008.8		1.39
1984-04-13	8.1		13.3		1.6		8.1		7.5		10		11		9		8.5		-1.2		5.6	***	-1.6		0			***	207.175		71			***	299.754			***	3		1013.3		1.83
1984-04-14	9.2		14.7		1.9		8.9		8		10.5		11.3		9.2		8.6		-5.8		2.2	***	-6.1		0			***	260.415		83			***	286.675			***	3		1015.5		1.88
1984-04-15	9.8		16.3		1		9.8		8.9		11.1		11.2		9.4		8.8		0.4		6.4	***	-0.4		0			***	193.286		60			***	312.787			***	4		1018		1.03
1984-04-16	9.4		11.1		6.5		9.5		8.2		10		11		9.6		8.9		5.5		11.4	***	4.8		3			***	52.083		16			***	350.778			***	-1		1016.4		1
1984-04-17	9.1		13		7.4		8.7		6.6		10.8		11.2		9.7		9		4.5		10.5	***	4		0			***	140.045		70			***	326.72			***	4		1018		1.61
1984-04-18	14.7		23.3		8		14.5		12.1		13.6		12.6		9.8		9.1		7.6		13.6	***	6.8		0			***	185.184		75			***	345.58			***	10		1010.9		1.82
1984-04-19	7.2		11.4		4.4		7		6.3		9.1		11.4		10.1		9.2		1.5		3.7	***	1		9.5			***	20.8332		8			***	348.056			***	-7		1012.2		3.67
1984-04-20	10.1		17.8		4.2		9.7		9		11		11		10.2		9.4		3.9		6.7	***	3.4		16.5			***	200.23		115			***	317.027			***	9		1004.5		1.41
1984-04-21	9.7		13.3		6.3		9.4		9		11.5		12.2		10.2		9.5		2.5		5.2	***	1.9		0			***	119.212		46			***	333.951			***	1		1014.4		1.64
1984-04-22	9.1		12.2		6.6		8.8		8.5		10.5		11.5		10.4		9.6		2.5		5.2	***	1.8		0			***	89.1198		29			***	339.036			***	0		1014.3		1.66
1984-04-23	9.1		16.4		3.9		5.9	***	8.4		11.8		12.1		10.4		9.7		2.5		5.1	***	1.6		0			***	243.054		91			***	302.425			***	6		1013.9		1.61
1984-04-24	11.2		19.5		2.1		11.2		11.2		12.7		12.7		10.6		9.8		-0.5		2	***	-1.5		0			***	268.517		95			***	302.359			***	6		1017.1		1.12
1984-04-25	13.9		21.8		5		14.3		14.4		14.4		13.7		10.8		9.9		3.7		6	***	2.9		0			***	225.693		75			***	329.664			***	8		1020.4		1.18
1984-04-26	14.5		21		8.9		14.4	*	14.9		14.4		14.3		11.1		10		6.3		8.4	***	5.2		0			***	240.739		85			***	332.784			***	8		1021.8		1.43
1984-04-27	13.8		19.8		8.4		13.7	*	14.3		13.8		14.3		11.4		10.1		5.5		7.7	***	4.5		0			***	228.008		86			***	331.336			***	5		1017.3		1.62
1984-04-28	12.8		19.8		5.3		12.7		12.7		13.7		14.3		11.7		10.2		2.7		4.9	***	1.8		0			***	266.202		95			***	315.051			***	5		1017.1		1.78
1984-04-29	10.2		14.7		6.7		9.7		9.3		12.7		14		11.9		10.3		1.9		4.1	***	1.2		0			***	244.211		87			***	307.769			***	2		1022.1		2.97
1984-04-30	11.3		15.9		6.1		11		10.7		12.8		13.4		12.1		10.5		4.6		6.8	***	3.8		0			***	116.897		45			***	344.716			***	2		1020.2		1.39
1984-05-01	14.1		19.2		10.5		13.6		13.3		14.6		14.5		12.1		10.6		7.4		9.6	***	6.5		0			***	178.24		76			***	346.486			***	8		1013.9		2.05
1984-05-02	13		19.1		7.2		13.3		13.4		14.4		14.9		12.3		10.8		6.3			***	5.8		16			***	178.24		86			***	340.044			***	1		1000.8		2.12
1984-05-03	14		23.5		5.5		14.3		14.6		15.3		15.1		12.5		10.9		3.9			***	3.1		0			***	283.563		121			***	319.243			***	6		1003.2		1.26
1984-05-04	14.1		20.3		5.3		14.9		15		15.8		15.7		12.7		11		2.1			***	1.6		0			***	223.378		68			***	330.949			***	5		1009.1		0.79
1984-05-05	16.7		23.4		9.3		17.1		16.7		16.7		16.1		12.9		11.1		4.5			***	4		0			***	241.897		86			***	341.976			***	10		1007.6		1.17
1984-05-06	17		21.9		10		17.5		16.8		16.7		16.5		13.2		11.3		8.3			***	7.3		0			***	252.313		99			***	346.753			***	9		1006.8		1.57
1984-05-07	18.2		25		11.5		18.6		18.1		18.4		17.6		13.5		11.4		9.5			***	8	*	0			***	261.572		93			***	352.732			***	11		1006.1		1.08
1984-05-08	18.8		25.7		11.6		19.3		18.7		18.6		18.1		13.9		11.6		9.4		9		8.4		0			***	249.998		94			***	357.995			***	9		1007.8		1.3
1984-05-09	19.7		26.2		13.5		20		19.3		19.8		18.8		14.3		11.7		12		11.5		11.2		3.5			***	248.841		101			***	366.912			***	12		1004.2		1.42
1984-05-10	15.5		20.7		11.1		15.7		15.3		17.9		18.5		14.7		11.9		5.1		4.8		4.7		0			***	295.137		110			***	327.066			***	4		1009.5		1.49
1984-05-11	16.4		21.3		10.8		16.2		15.7		16.8		17.3		15		12.1		8.8		8.4		8.3		0			***	155.092		60			***	365.556			***	3		1013		1.94
1984-05-12	14.9		18.1		12.7		14.5		14		16.7		17.3		15		12.2		8.4		8		8.1		0			***	204.86		91			***	347.397			***	5		1011.2		2.74
1984-05-13	11.8		13		9.6		11.5		11.1		14.1		16		15.1		12.4		7.7		7.4		7.9		0.5			***	37.0368		14			***	368.408			***	-5		1010		1.79
1984-05-14	11.9		16.1		9.5		11.6		11.2		13.7		15		14.9		12.6		7.3		7.1		9	***	3.5			***	89.1198		45			***	356.692			***	0		1002		1.75
1984-05-15	11.1		14.8		7.9		10.7		10.3		13.6		14.7		14.7		12.7		4.5		4.4		6.5	***	0			***	140.045		63			***	339.747			***	1		1010.7		1.99
1984-05-16	12.1		15.5		10.2		11.9		11.6		13.6		14.7		14.5		12.8		7.2		7		9.2	***	9.5			***	71.7588	***	25			***	361.795			***	-1		1009.7		1.07
1984-05-17	13.4		17.6		11		13.1		12.6		15.2		15.3		14.4		12.9		6.9		7		9.2	***		***		***		***	101			***		***		***	7		1010.6		2.14
1984-05-18	12.9		17.3		10		12.7		12.2		15.3		15.8		14.4		12.9		5.8		5.6		7.2	***	0	*		***	240.739	*	101			***	328.397			***	6		1011.8		1.53
1984-05-19	14.1		19.5		7.4		14.1		13.8		16.2		16.2		14.5		13		6.4		6.3		9.2	***	0			***	284.72		114			***	326.322			***	8		1013.1		1.44
1984-05-20	16.4		20.6		13.5		16.1		15.6		17.2		17.1		14.7		13		6.9		6.8		11.7	***	0			***	251.156		104			***	344.441			***	8		1014.5		2.26
1984-05-21	15.2		18.7		13.4		15.1		14.6		15.6		16.5		15		13.1		6.4		6.3		11.2	***	0			***	114.583		41			***	367.605			***	-1		1016.1		2.3
1984-05-22	14.2		17.5		11.5		14		13.7		15.6		16.3		15		13.2		4.6		4.6		9.8	***	0			***	202.545		84			***	341.575			***	4		1016.4		2.5
1984-05-23	13.4		16		10.9		13.2		12.8		14.7		15.7		15		13.2		6.5		6.4		11.4	***	9			***	90.2772		38			***	364.209			***	-1		1014.6		1.83
1984-05-24	15.2		20		11.8		15		14.5		16.1		16.1		15		13.3		9.7		9.7		14.6	***	0.5			***	160.879		73			***	360.327			***	6		1013.3		1.75
1984-05-25	16		20.8		12.5		15.8		15.2		17.1		17		15		13.4		9.9		9.7		14.6	***	0			***	216.434		99			***	353.817			***	9		1015.6		1.35
1984-05-26	16.6		22.1		11.5		16.5		15.9		17.6		17.5		15.2		13.4		10.6		10.3		15.1	***	0			***	192.128		84			***	362.328			***	8		1015.3		1.25
1984-05-27	18.6		24.4		12.2		18.8		18.5		18.5		18.2		15.5		13.5		12.4		11.9		16.7	***	0			***	167.823		71			***	379.171			***	8		1011.5		1.03
1984-05-28	19.2		22.9		16.6		19.2		18.7		19		18.8		15.7		13.6		12.2		11.9		16.8	***	0			***	180.554		80			***	379.618			***	9		1006.6		1.18
1984-05-29	18.4		21.2		16.4		18.4		17.8		18.8		18.8		16		13.7		12.4		12.2		17	***	0			***	107.638		47			***	389.963			***	3		1004.6		1.58
1984-05-30	19.3		24		16.3		19.2		18.5		19.6		19.2		16.3		13.8		12.9		12.6		17.6	***	0			***	206.017		96			***	376.437			***	11		1008.3		1.43
1984-05-31	20		23.2		16.7		20		19.4		19.7		19.5		16.5		13.9		14.3		14.1		18.4	***	13			***	127.314		58			***	396.273			***	6		1009.1		1.34
1984-06-01		***	25.9	***		***	16.1	***	15.7	***		***		***		***		***	11.4	***	11.3	***	11.4	***		***		***		***	93	***		***		***		***	8	***		***	1.03
1984-06-02		***		***		***		***		***		***		***		***		***		***		***		***		***		***		***		***		***		***		***		***		***	0.9132	***
1984-06-03	17.6		19.8		16.2		17.4		16.8		19.2		20		17.4		14.4		13.1		12.8		12.8		0			***	129.629		68			***	382.134			***	1		1006.2		2.26	***
1984-06-04	18.3		21.9		16.2		18.1		17.5		19.4		19.7		17.5		14.5		13.2		13		12.9		0			***	179.397		92			***	376.83			***	6		1013.2		2.09
1984-06-05	18.6		22.3		15.2		18.7		18.1		19.6		19.8		17.6		14.7		12.2		12		11.9		0			***	160.879		63			***	380.869			***	4		1017.7		1.36
1984-06-06	19.7		25.5		15.1		19.7		19.1		20.7		20.4		17.6		14.8		13.6		13.3		13.2		0			***	261.572		126			***	370.576			***	13		1016.5		1.1
1984-06-07	21.6		26.2		16.9		21.6		20.3		21		20.8		17.8		14.9		14.6		14.3		14.2		0			***	209.489		102			***	390.714			***	9		1012.6		2.41
1984-06-08	22.4		26.2		19.2		21.9		20.2		22.4		21.6		18.1		15		13.7		13.5		13.4		0			***	232.637		102			***	389.596			***	10		1011.7		2.08
1984-06-09	21.9		26.2		17		21.5		20.8		22.1		21.6		18.3		15.2		12.1		11.9		12		0			***	224.536		102			***	386.125			***	8		1013.6		1.62
1984-06-10	21.8		24.5		19.2		21.4		20.5		21.8		21.4		18.6		15.3		16.5		16.2		16.2		0			***	112.268		62			***	410.987			***	4		1008.6		2.43
1984-06-11	20.7		22.3		18.7		20.3		19.6		21.2		21.2		18.7		15.4		15.7		15.6		15.5		13			***	76.3884		36			***	410.949			***	1		1011.2		1.32
1984-06-12	21.3		25.4		18.7		21		20.5		21.4		21		18.7		15.6		15.1		14.8		14.7		0			***	151.619		63			***	400.075			***	6		1013.6		0.85
1984-06-13	19.5		21.6		18.1		19.2		18.8		20.4		20.7		18.7		15.7		15.8		15.5		15.6		33.5			***	46.296		17			***	409.963			***	-1		1012.4		0.58
1984-06-14	20.8		24.9		17.9		20.3		19.7		21.3		20.7		18.8		16.5		15.9		15.7		15.7		6			***	149.305		76			***	398.559			***	8		1009.4		1.23
1984-06-15	20.4		24.5		16.7		19.8		19.2		21.8		21.3		18.9		16.5		15.3		15		15		0			***	196.758		104			***	387.702			***	8		1010.2		1.37
1984-06-16	22.2		26.8		18.2		21.7		21.1		22.2		21.6		19		16.5		16.4		16.1		16.1		0			***	146.99		75			***	407.136			***	6		1007.9		1.33
1984-06-17	23.5		27.6		20.1		23.1		22.4		23		22.1		19.2		16.5		18.1		17.9		17.8		1.5			***	156.249		79			***	414.62			***	8		1005.5		1.7
1984-06-18	24.5		27.3		22.7		24		23.5		24.1		22.9		19.4		16.5		20.3		20.1		19.9		0.5			***	136.573		76			***	425.727			***	9		1003.6		1.94
1984-06-19	25		29.9		21.2		24.6		24.4		24.6		23.4		19.6		16.6		20.3		19.9		19.7		0			***	170.138		85			***	423.559			***	9		1000.1		0.95
1984-06-20	23.3		26.4		20.7		22.9		22.6		23.7		23.4		19.9		16.7		18.5		18.2		18.1		3			***	111.11		52			***	421.23			***	3		1000.6		1.25
1984-06-21	18.8		20.3		17.7		18.3		17.9		21.5		22.1		20.1		16.8		14.6		14.3		14.2		0.5			***	69.444		37			***	401.316			***	-3		1008.6		1.82
1984-06-22	18.6		20.5		17.3		18		17.7		20.6		21.1		20		16.9		15.4		15		15		0			***	49.7682		27			***	404.216			***	0		1007.4		1.01
1984-06-23	18.5		21.4		17.3		18		17.7		19.6		20.2		19.9		17.6		15.1		14.7		14.8		43.5			***	57.87		30			***	402.026			***	1		1003.2		1.15
1984-06-24	19.5		23.3		16.4		18.9		18.6		20.8		20.6		19.7		18.1		13.8		13.5		13.6		0			***	186.341		95			***	382.985			***	7		1009.6		1.47
1984-06-25	19.3		22.1		15.8		18.7		18.4		20.6		20.6		19.6		17.9		15.8		15.5		15.7		2.5			***	78.7032		43			***	402.853			***	2		1005		1.05
1984-06-26	17.8		19		16.8		17.3		17.1		19.6		20.3		19.6		17.8		14.2		13.9		14		6			***	49.7682		27			***	399.494			***	-2		1006.1		1.8
1984-06-27	18.9		22		16.8		18.3		18.1		19.7		19.8		19.6		18.3		14.8		14.5		14.7			***		***	81.018		47			***	399.714			***	3		1001.4		1.24
1984-06-28	20.7		24.4		17.5		20.1		19.8		21		20.5		19.4		18.2		15.5		15.1		15.2			***		***	141.203		76			***	399.052			***	7		1002.8		0.8
1984-06-29	19.6		21.6		17.8		19.2		18.9		20.5		20.7		19.5		18.4		15.4		15.2		15.3		23.5			***	67.1292			***		***	406.463			***	1		1002.4		0.89
1984-06-30	20.4		25.2		17.1		19.8		19.6		21.7		21.2		19.6		18.4		14.6		14.3		14.4			***		***	253.471		104			***	377.438			***	9		1008.1		1.19
1984-07-01	19.3		24.2		16.5		18.6		18.5		22		21.7		19.7		18.3		14.5		14.2		14.3			***		***	255.785			***		***	371.364			***	8		1011.7		1.5
1984-07-02	20.7		26.9		16		20.3		20.2		22.2		21.8		19.9		18.1		15.6		15.3		15.3			***		***	216.434			***		***	386.549			***	7		1009.7		0.86
1984-07-03	24.5		30.1		19		24.4		24.5		24.2		23		20		18		18.7		18.3		18.4			***		***	244.211			***		***	407.636			***	11		1006.1		0.76
1984-07-04	27.1		33.8		20.6		27		27.2		25.7		24.2		20.3		18		20.4		20.1		20			***		***	249.998			***		***	424.463			***	12		1004.9		0.82
1984-07-05	25.8		32.9		21.5		25.6		25.7		26		25		20.7		18		20.8		20.5		20.6			***		***	219.906			***		***	421.986			***	8		1006.7		0.79
1984-07-06	23.2		27.8		19.5		22.7		22.6		24.5		24.3		21.1		18.1		18.3		18		18.2			***		***	164.351			***		***	411.907			***	3		1007.4		1.62
1984-07-07	19.2		21.1		18.2		18.8		18.8		21.8		22.7		21.3		18.2		15.1		15		15.1			***		***	59.0274			***		***	405.676			***	-4		1010.7		1.55
1984-07-08	19.3		20.4		18.2		18.8		18.8		21		21.6		21.2		18.3		16.3		16.1		16.4			***		***	52.083			***		***	407.884			***	-1		1007.6		0.91
1984-07-09	21.4		25.2		19.1		20.9		20.8		22.2		22		21		18.7		17.6		17.3		17.4			***		***	124.999			***		***	407.453			***	6		1002.7		0.97
1984-07-10	21.1		24.4		18.6		20.6		20.5		22.3		22.2		20.8		18.7		16.2		16		16			***		***	155.092			***		***	399.354			***	5		1003.1		1.53
1984-07-11	22.6		26.4		19.6		22.2		22.1		23		22.5		20.8		18.6		18.6		18.3		18.6			***		***	156.249			***		***	410.024			***	7		1003.5		0.87
1984-07-12	22.4		26.2		20.3		21.8		21.8		23.5		23.1		20.9		18.6		18.4		18.2		18.4			***		***	186.341			***		***	404.004			***	8		1004.2		1.45
1984-07-13	23.9		26.7		20.8		23.5		23.5		23.7		23.2		21.1		18.6		20.4		20.2		20.3			***		***	109.953			***		***	426.213			***	6		999.1		1.43
1984-07-14	26.2		29.6		22.8		25.8		25.8		25		24		21.2		18.6		21.1		20.7		20.7			***		***	153.934			***		***	433.536			***	11		996.2		1.21
1984-07-15	26.2		30.7		24		25.8		25.8		25.7		24.7		21.4		18.7		22.5		22		22.3			***		***	146.99			***		***	436.259			***	12		999.5		1.15
1984-07-16	26.7		30.2		23.4		26.3		26.4		26.2		25.2		21.6		18.7		21.2		20.8		21			***		***	195.601		139			***	430.713			***	8		1002.9		1.13
1984-07-17	26.3		30.4		23.2		25.9		26.1		26.4		25.5		21.9		18.8		20.7		20.4		20.6			***		***	233.795		158			***	422.287			***	8		1003.7		1.06
1984-07-18	25.7		29.4		23.4		25.3		25.3		26.5		25.7		22.1		18.9		20.6		20.2		20.5			***		***	248.841		179			***	416.635			***	9		1003.3		1.41
1984-07-19	24.9		27.3		23.3		24.7		24.7		25.8		25.4		22.3		19		21.6		21.3		21.6		2.5	*		***	113.425		86			***	432.421			***	4		1003.3		1.38
1984-07-20	25		28.5		23		24.8		24.8		25.8		25.3		22.5		19.1		20.8		20.6		20.9		4			***	186.341		142			***	421.59			***	7		1004.6		1.55
1984-07-21	25.1		28.8		22.9		25		25		25.9		25.4		22.5		19.1		20.9		20.7		20.9		1.5			***		***	124			***		***		***	5		1005.2		1.2
1984-07-22	24.6		28.2		22		24.4		24.4		26		25.5		22.6		19.2		19		18.8		19.1		0			***		***	160			***		***		***	6		1006.1		1.43
1984-07-23	23.9		27		20.9		23.7		23.7		25		25		22.7		19.3		18.8		18.5		18.7		0			***	171.295		118			***	414.755			***	3		1005.6		1.29
1984-07-24	24.7		28.9		19.6		24.7		24.7		25.3		24.9		22.7		19.4		19.8		19.5		19.6		0			***	206.017		138			***	415.326			***	6		1004		1.01
1984-07-25	26.5		30.5		22.4		26.4		26.4		26.5		25.7		22.7		19.5		21.1		20.8		21		0			***	221.063		152			***	425.476			***	7		1003.4		0.86
1984-07-26	25.6		30		22.5		25.5		25.5		26.6		26		22.9		19.6		20.1		19.8		20		0			***	267.359		175			***	412.088			***	7		1003.6		1.2
1984-07-27	24.9		28.5		20.7		24.9		24.9		26.1		25.7		23		19.7		19.7		19.5		19.7		0			***	196.758		133			***	417.499			***	4		1004.9		1.03
1984-07-28	25		27		22.4		25		24.9		25.7		25.4		23.1		19.8		21.9		21.5		21.8		2			***	98.379		61			***	435.252			***	3		1007.4		0.84
1984-07-29	26.7		30.6		23.7		26.6		26.6		26.7		25.9		23.1		19.8		21.9		21.6		21.9		0			***	212.962		144			***	429.059			***	7		1008.7		1.02
1984-07-30	25.9		30		22.3		25.8		25.8		26.6		26		23.2		19.9		20.6		20.3		20.6		0			***		***	170			***		***		***	7		1008.7		0.96
1984-07-31	26.4		32		21.7		26.5		26.6		26.9		26.2		23.3		20		21		20.7		21		0			***	211.804		140			***	425.75			***	7		1007.7		0.74
1984-08-01	26.9		32.3		21.9		27.2		27.4		26.9		26.4		23.3		20		20.2		19.9		20.2		0			***	231.48		155			***	424.243			***	6		1007.5		0.76
1984-08-02	26.8		32.5		22.4		26.8		26.9		27.2		26.6		23.5		20.1		20.8		20.7		21.2		15			***	214.119		149			***	427.183			***	5		1007.1		0.81
1984-08-03	26		31.4		21.8		26		26.2		26.8		26.4		23.6		20.2		20.5		20.4		20.9		0			***	190.971		129			***	425.413			***	4		1007.3		0.71
1984-08-04	26.4		31.3		21.6		26.4		26.5		27		26.5		23.7		20.2		20.8		20.6		20.8		0			***	215.276		137			***	424.625			***	4		1008.4		0.79
1984-08-05	27.3		32.5		22.6		27.4		27.4		27.1		26.6		23.7		20.3		21.5		21.2		21.4		0			***	228.008		147			***	429.208			***	5		1008.6		0.78
1984-08-06	27.8		33.3		22.5		28.1		28.3		27.3		26.7		23.8		20.4		19.5	*	18.5	*	15.7	***	1.5			***	243.054		161			***	425.805			***	5		1007.7		0.7
1984-08-07	28.3		34.1		23.1		28.3		28.4		27.8		27.1		23.8		20.5		19.8		20.4		13.5	***	13.5			***	237.267		158			***	430.02			***	6		1007.7		0.92
1984-08-08	27.2		31		23.2		27.1		27.1		27.7		27.2		24		20.5		20.7		20.8		19.8	***	0			***	211.804		147			***	429.16			***	5		1008.5		1.03
1984-08-09	26.9		32.5		21.9		26.8		26.8		27.5		27		24.1		20.6		19.6		19.5		19.6	***	0			***	222.221		150			***	423.792			***	4		1008.5		0.76
1984-08-10	26.4		31.1		23.8		26.5		26.6		27.2		26.9		24.1		20.7		20.9		20.9		20	***	0.5			***	137.731		91			***	435.878			***	2		1008.1		0.54
1984-08-11	27.3		32.2		22.3		27.2		27.3		27.2		26.7		24.1		20.8		20.8		20.8		20	***	0			***	188.656		121			***	433.039			***	4		1007.4		0.87
1984-08-12	28.1		33.5		24.2		27.9		27.8		27.8		27.1		24.1		20.9		22		21.7		19.8	***	0			***	208.332		139			***	436.771			***	6		1006		0.89
1984-08-13	26.5		30.2		24.2		26.3		26.2		27.5		27.1		24.3		20.9		22.1		21.9		17.4	***	0			***	206.017		137			***	428.038			***	4		1008.4		1.55
1984-08-14	27.5		33		23.4		27.2		27.2		27.9		27.3		24.3		20.9		20.1		19.9		17.5	***	0			***	251.156		157			***	423.308			***	5		1009.6		1.01
1984-08-15	27.9		33.7		23.4		27.8		27.8		27.7		27.2		24.4		21		20.1		20		18	***	0			***	240.739		149			***	427.001			***	5		1010		1.06
1984-08-16	28		34		23.3		27.8		27.8		27.8		27.2		24.4		21.1		20.8		20.6		19.2	***	0			***		***	130			***		***		***	4		1011		1.04
1984-08-17	27.8		33.3		23.5		27.9		27.9		27.8		27.3		24.5		21.1		20.6		20.3		19	***	0			***	228.008		141			***	429.171			***	4		1012.2		0.71
1984-08-18	27.4		33.2		22.7		27.5		27.6		27.3		27		24.5		21.2		20.5		20.1		18.9	***	0			***		***	135			***		***		***	4		1011.6		0.72
1984-08-19	27.2		33.3		22		27.3		27.5		27.3		26.9		24.5		21.3		20.4		19.8		18.7	***	0			***	238.424		146			***	423.477			***	5		1009.5		0.86
1984-08-20	27.2		32.6		22.4		27.1		27.1		27.6		27.1		24.5		21.3		20.6		20.1		19	***	0			***	236.11		150			***	424.033			***	6		1007.5		0.98
1984-08-21	27		30.8		24.9		26.9		26.8		27.3		26.9		24.5		21.4		22.6		22.2		20.9	***	1			***	137.731		95			***	440.536			***	3		1002.7		2.19
1984-08-22	27.9		30.6		26.4		27.9		27.8		27.2		26.9		24.6		21.4		22.3		22		20.3	***	0.5			***	162.036		110			***	441.576			***	3		996.9		3.79
1984-08-23	27.7		34.1		20.5		28		28.1		26.9		26.8		24.6		21.4		17.7		17.5		16	***	0			***	203.702		112			***	425.973			***	2		999.4		1.3
1984-08-24	22.2		26		20.4		22.3		22.2		24.8		25.6		24.5		21.5		14.3		14.3		12.8	***	0			***	159.721		103			***	399.115			***	0		1009.4		1.5
1984-08-25	22.6		26.7		18.9		22.5		22.4		24.5		24.9		24.3		21.5		15.6		15.4		13.8	***	0			***	162.036		91			***	402.371			***	1		1013.1		0.75
1984-08-26	24.7		31.3		18.2		24.6		24.6		25		24.9		24		21.6		18.1		17.5		15.9	***	0			***	209.489		126			***	408.823			***	4		1012		0.77
1984-08-27	24.8		28.5		20.9		25.3		25.6		25.3		25.2		23.9		21.6		20.8		20.3		18.7	***	0			***	81.018		40			***	434.644			***	2		1005.9		0.73
1984-08-28	25.3		31.8		18.9		26		26.5		25		25		23.8		21.5		16.6		16.3		14.6	***	0			***	217.591		126			***	407.504			***	2		1005.8		0.56
1984-08-29	22.8		27.3		19.9		22.7		22.6		24.4		24.8		23.8		21.5		15.5		15.4		13.7	***	0			***	199.073		111			***	395.485			***	1		1008.4		1.67
1984-08-30	20.6		21.4		20		20.7		20.6		23		23.8		23.6		21.5		15.6		15.6		14	***	0			***	49.7682		30			***	413.992			***	-2		1008.7		0.99
1984-08-31	25.1		31.7		20		25.1		25.1		24.4		24.1		23.4		21.5		18		17.8		16	***	0			***	180.554		113			***	415.042			***	5		1007.4		0.69
1984-09-01	25.2		29.8		22.5		25.1		25.1		25.2		24.8		23.3		21.5		20.1		20		18	***	0			***	164.351		104			***	421.498			***	4		1008		1.32
1984-09-02	27.5		34.8		23.2		27.4		27.3		26.2		25.5		23.3		21.4		20.8		20.5		18.4	***	0			***	204.86		133			***	428.827			***	6		1002.1		1.03
1984-09-03	25.8		32.1		22.3		26		26		26		25.7		23.5		21.4		20.2		20		18.3	***	0			***	224.536		150			***	414.742			***	4		1000.7		1.71
1984-09-04	23.3		29.4		20.9		23.2		23		25.1		25.2		23.6		21.4		18.6		18.5		17.8	*	0			***	141.203		98			***	412.371			***	3		1002.9		1.97
1984-09-05	21		24.4		19.6		21		20.9		23.4		24.2		23.6		21.4		16.8		16.7		16.4			***		***	77.5458		48			***	410.396			***	-1		1006.8		1.09
1984-09-06	21.6		27.2		17		21.8		21.9		22.9		23.6		23.4		21.4		13		12.8		12.6			***		***	210.647		124			***	381.379			***	-1		1012.7		0.83
1984-09-07	20.1		25.5		14.3		20.4		20.6		21.7		22.7		23.2		21.4		13.3		13.1		12.8			***		***	156.249		73			***	385.337			***	-2		1014.6		0.74
1984-09-08	20.3		24.9		14.4		20.6		21.1		21.3		22.2		22.9		21.4		14.9		14.5		14.1			***		***	114.583		47			***	396.916			***	-2		1011.2		0.8
1984-09-09	21.8		24.9		18.3		21.7		21.5		22.4		22.5		22.6		21.4		17.2		17.1		16.8			***		***	89.1198		52			***	412.292			***	2		1003.4		0.72
1984-09-10	23.5		30.4		19.9		23.3		23.2		23.9		23.5		22.5		21.3		18.4		18.3		18.1			***		***	157.406		100			***	409.204			***	4		998		1.23
1984-09-11	22.4		25.9		20.2		22.3		22.3		23.2		23.4		22.5		21.2		16.2		16.1		16.1			***		***	112.268		65			***	409.594			***	1		1002.8		0.86
1984-09-12	21.4		25		19.1		21.5		21.4		22.5		23		22.5		21.2		13.3		13.2		13.3			***		***	120.37		63			***	399.401			***	0		1007.1		0.68
1984-09-13	21.2		25.7		15.9		21.4		21.5		22		22.4		22.5		21.2		14.4		14.5		14.4			***		***	133.101		70			***	396.412			***	1		1010.8		0.96
1984-09-14	21.8		23.5		20.4		21.8		21.7		22.7		22.7		22.3		21.1		18		18		17.9			***		***	54.3978		31			***	419.794			***	1		1010.6		0.69
1984-09-15	21.7		24.6		19.3		21.6		21.4		22.6		22.7		22.3		21.1		16.3		16.1		15.9			***		***	76.3884		44			***	413.389			***	1		1014.8		1.07
1984-09-16	19.8		21		18.6		19.8		19.6		21.7		22.3		22.2		21		16.9		16.9		16.7			***		***	33.5646	***	16			***	412.641			***	-2		1011.9		0.66
1984-09-17	21.2		25.6		18.2		21		20.9		22.1		22.3		22.1		21		15.7		15.7		15.5			***		***	148.147	***	77			***	393.899			***	2		1009.3		1.14
1984-09-18	20.1		23.5		16.2		20.4		20.5		21.4		21.9		22		20.9		15.1		15.1		15			***		***	90.2772		41			***	400.085			***	-1		1009.1		0.58
1984-09-19		***	19.6	***		***		***		***		***		***		***		***		***		***		***		***		***		***	-2	***		***		***		***	-3	***		***	0.37
1984-09-20	20.9		24.4		18.6		20.9		20.7		21.9		22		21.7		20.9		16.4		16.5		17			***		***	92.592		54			***	404.746			***	1		1014		0.72	***
1984-09-21	21.1		24.2		18.9		21.3		21.1		21.9		22.1		21.7		20.8		15.9		16		16.9			***		***	104.166		52			***	402.672			***	1		1016		0.77
1984-09-22	20.3		25.1		15		20.6		20.5		21.4		21.9		21.6		20.8		13.5		13.6		13.9			***		***	187.499		87			***	376.441			***	-1		1015.5		1.36
1984-09-23	18.7		24.7		12.6		19.1		19.2		19.8		20.8		21.6		20.7		11.5		11.6		11.2			***		***	187.499		79			***	364.903			***	-4		1012.6		1.1
1984-09-24	18.4		24.8		12.5		18.6		18.6		19.5		20.4		21.3		20.7		11.3		11.3		10.8			***		***	202.545		83			***	359.247			***	-3		1009.9		0.79
1984-09-25	19.2		27.2		11.5		20.3		20.6		19.3		20.1		21.1		20.6		12		12		11.3			***		***	179.397		83			***	369.336			***	-1		1006.9		0.49
1984-09-26	19.5		22		15.6		19.8		19.8		19.7		20.3		20.9		20.6		11.4		11.5		11.1			***		***	98.379		45			***	390.663			***	-1		1011.7		1.34
1984-09-27	15.8		22.1		9.4		16.6		16.7		18.1		19.5		20.7		20.5		6.7		6.9		6.6			***		***	192.128		81			***	341.609			***	-6		1018.5		0.65
1984-09-28	16.6		24.1		9		17.6		18.4		17.6		18.8		20.5		20.4		7.4		7.8		7.2		0	***		***	190.971		77			***	346.323			***	-4		1018.2		0.62
1984-09-29	18.1		24.3		10.4		19		19.5		17.8		18.6		20.2		20.3		13		12.8		11.8		0			***	104.166		44			***	382.525			***	-1		1013.7		0.57
1984-09-30	21.7		27.9		16.2		22.1		21.9		19.8		19.6		20		20.2		15		14.8		14.1		0			***	134.258		69			***	396.002			***	4		1009		0.95
1984-10-01	21		24.8		17.4		21.4		21		20.2		20.3		20		20.1		11.5		11.6		11.2		0			***	151.619		68			***	383.139			***	1		1011.5		1.23
1984-10-02	21.5		26.1		17.7		21.9		21.4		20.4		20.4		20		20		13.8		13.8		13.3		0			***	119.212		60			***	396.864			***	3		1012.4		0.98
1984-10-03	23.8		31.1		18.4		24.1		23.6		21.9		21.2		20.1		20		16.9		16.7		16.1		0			***	118.055		66			***	412.897			***	4		1001		1.69
1984-10-04	15.9		17.5		14.4		16.1		15.7		19		20.3		20.3		19.9		10.4		10.5		9.9			***		***	18.5184		4			***	393.34			***	-5		1007.9		1.05
1984-10-05	16.4		21.4		10.3		16.8		16.6		18.1		19.1		20.2		19.9		10.1		10		9.3		3	*		***	146.99	*	58			***	358.017			***	-3		1011.1		0.82
1984-10-06	14.2		17.9		11.2		15.1		15.1		17		18.5		20		19.8		4.7		5.2		5.6		0			***	106.481	*	46			***	353.565			***	-4		1016.7		0.79
1984-10-07	14.4		17.4		11.8		14.6		14.4		16.1		17.5		19.7		19.8		4.9		5		4.6		0			***	103.009		35			***	355.571			***	-4		1018.1		1.61
1984-10-08	13.4		16.9		8.1		13.5		13.3		15.2		16.8		19.3		19.7		3.4		3.5		3		0			***	104.166		26			***	348.929			***	-6		1020.7		1.24
1984-10-09	13.2		17.6		8.4		13.4		13.2		15.1		16.5		19		19.6		3.6		3.7		3.2		0			***	123.842		38			***	341.415			***	-4		1020.7		1.07
1984-10-10	14.7		19.5		9.6		14.9		14.6		15.5		16.4		18.7		19.5		6.9		6.9		6.4		0			***	93.7494		40			***	360.793			***	-1		1020.4		0.98
1984-10-11	16.1		17.9		13.7		16.5		16.2		16.3		16.9		18.4		19.4		10.1		10.2		9.7		5.5			***	89.1198		26			***	371.513			***	-1		1020.8		1.08
1984-10-12	17.8		19.1		16.4		18		17.8		17.1		17.3		18.3		19.3		13.8		13.8		13.2		13.5			***	48.6108	***	13			***	394.618			***	1		1014.3		2.49
1984-10-13	19.8		25.1		16.2		19.8		19.8		18.7		18.3		18.3		19.2		14.2		14		13.7		19			***	135.416	***	61			***	380.986			***	4		1002.4		1.14
1984-10-14	19.2		24.8		14.9		19.2		19.4		18.6		18.7		18.4		19.1		10.5		10.3		10.2		0			***	175.925		74			***	361.216			***	-1		1006.9		0.89
1984-10-15	14.2		20.9		7.7		15.1		15.4		16.4		17.7		18.5		19		4.2		4.3		4.5		0			***	178.24		60			***	327.348			***	-8		1019.5		0.79
1984-10-16	13.9		18.1		7.1		14.2		14.7		15.1		16.3		18.4		18.9		6.6		6.6		6.3		0			***	100.694		35			***	352.72			***	-3		1018.2		0.58
1984-10-17	15.9		19.3		13.9		16.1		16.2		16.7		17		18.1		18.8		11.5		11.5		11.5		1.5			***	57.87		27			***	379.776			***	1		1005.3		0.66
1984-10-18	17.3		23.5		11.7		17.6		18.1		16.5		17		18		18.8		10.3		10.1		9.9		0			***	158.564		58			***	354.997			***	-2		1013.4		0.91
1984-10-19	15.2		16.4		13.2		15.2		15.3		16.3		17		17.9		18.7		11.1		11.1		10.9		14			***	24.3054		4			***	386.873			***	-2		1020		1.38
1984-10-20	14.2		16.2		12.8		14		14		16.2		16.7		17.8		18.6		10.9		10.8		10.7		6.5			***	47.4534		26			***	373.604			***	-1		1012.5		0.77
1984-10-21	14		20.9		7.2		14.4		14.6		16.3		17		17.7		18.5		8		8.1		8.3		1			***	129.629		55			***	343.406			***	-3		1003.7		0.85
1984-10-22	11.7		19		4.9		12.2		12.6		13.8		15.5		17.6		18.4		3.3		3.3		3.3		0			***	153.934		48			***	319.183			***	-8		1009.4		0.6
1984-10-23	12.1		19.5		6.7		13		13.6		13.5		14.8		17.4		18.4		7.5		7.2		6.6		0			***	120.37		40			***	336.198			***	-5		1011.3		0.5
1984-10-24	14.5		21.4		7.5		14.4		14.7		14.3		14.9		17		18.3		8.2		7.9		7.9		0			***	145.832		47			***	340.017			***	-1		1014.8		1.08
1984-10-25	14.2		18.4		9.3		15		15.7		14.9		15.6		16.8		18.2		10		9.8		9.1		0			***	63.657		11			***	366.845			***	-2		1012.3		0.54
1984-10-26	13.8		20.9		6.7		14		14.8		13.8		14.8		16.8		18.1		7.1		6.7		6.6		0			***	137.731		46			***	337.051			***	-3		1013.5		1.04
1984-10-27	15.5		20		13		15.8		16.2		15.3		15.6		16.6		18		9.4		9.1		9		0			***	91.4346		38			***	362.871			***	0		1007.8		0.45
1984-10-28	15.1		19.3		11.1		15		15.3		15.1		15.6		16.6		17.9		6.6		6.5		6.5		0			***	109.953		40			***	351.312			***	-1		1004.7		0.99
1984-10-29	11.5		14.1		6.6		11.8		11.9		13.9		15.2		16.6		17.8		4.8		4.9		4.9		1			***	52.083		8			***	354.101			***	-6		1004.7		1.1
1984-10-30	9		16.7		1		10.1		10.4		12.3		14		16.4		17.7		0.6		0.8		0.9		0			***	141.203		42			***	304.949			***	-10		1007.4		0.67
1984-10-31	8.1		16.5		-0.9		9.6		10.4		10.2		12.3		16.1		17.6		-1.4		-1.2		-1.3		0			***	158.564		46			***	292.364			***	-11		1014.8		0.76
1984-11-01	9.4		14.7		5.7		9.8		10		11.4		12.6		15.7		17.5		2		2.2		2.3		0			***	77.5458		19			***	331.568			***	-4		1014.3		0.63
1984-11-02	6.9		16.1		0.5		8.4		9.5		9.9		12		15.4		17.4		-0.1		0		-0.4		0			***	91.4346		10			***	312.839			***	-12		1011.3		0.65
1984-11-03	8.5		15.7		-0.4		9.2		9.8		9.1		10.9		15		17.3		-0.8		-0.7		-0.9		0			***	148.147		40			***	297.006			***	-8		1018.7		0.6
1984-11-04	11.4		17.7		5		11.6		11.8		11		11.7		14.6		17.1		4.8		4.6		4.3		0			***	126.157		34			***	323.632			***	-3		1023		0.68
1984-11-05	11.9		21		5.5		12.8		13.3		11.4		12.2		14.4		16.9		6.8		6.5		5.8		0			***	127.314		38			***	327.374			***	-4		1020.4		0.63
1984-11-06	11.4		19.2		4.6		12.3		13.2		11		12		14.3		16.8		6.5		5.8		5		0			***	104.166		20			***	332.648			***	-5		1020.5		0.65
1984-11-07	10.3		20.4		4.8		11.9		13.1		10.8		11.9		14.2		16.6		6.3		5.9		4.7		0			***	111.11		32			***	324.341			***	-6		1013.9		0.47
1984-11-08	12.4		21.8		5.7		13.3		14		11.2		12		14.1		16.5		5.1		5		4.7		0			***	120.37		33			***	328.777			***	-3		1010.7		0.65
1984-11-09	12.6		21.6		5		13.8		14.5		10.9		11.8		14		16.4		5.3		5.1		4.8		0			***	119.212		32			***	329.957			***	-4		1011.3		0.54
1984-11-10	13.1		15.2		11		12.9		12.9		12		12.4		13.9		16.2		2.7		2.7		2.5		0			***	70.6014		25			***	350.114			***	1		1018.6		1.62
1984-11-11	12.9		16.6		10		13		13		12.7		12.9		13.9		16.1		6.5		6.4		6.1		0			***	48.6108		20			***	360.799			***	1		1007.1		0.62
1984-11-12	10.4		15.4		4.1		11.4		11.9		11.4		12.6		14		16		4.7		4.5		3.7		0			***	48.6108		7			***	347.387			***	-5		1012.8		0.69
1984-11-13	7.2		13.3		2.3		8		8.6		9.7		11.4		13.9		15.9		-0.9		-0.8		-1.2		0			***	113.425		31			***	300.35			***	-9		1020		0.53
1984-11-14	7.4		13.6		-0.9		7.6		8		8.8		10.4		13.7		15.8		-0.1		-0.2		-0.8		0			***	119.212		33			***	299.163			***	-7		1023.2		0.64
1984-11-15	9.2		11.2		8.1		9.1		9		10.4		11.2		13.4		15.8		5.2		5.2		5		14			***	18.5184		7			***	355.042			***	-1		1012.5		0.74
1984-11-16	11.4		15.6		6.5		11.6		11.8		11.3		11.8		13.2		15.7		5.6		5.8		5.5		7			***	92.592		25			***	332.732			***	-2		1016.6		0.82
1984-11-17	7.8	***	16.1	***		***	8.4	***	8.8	***		***		***		***		***	4	***	3.8	***	3.3	***		***		***	86.805	***	30	***		***		***		***	0	***		***	0.32
1984-11-18	10		14.5		4		10		10.2		9.9		10.8		13.1		15.4		4.5		4.4		3.8		0			***	60.1848		14			***	338.806			***	-2		1015.4		1.47	***
1984-11-19	8.9		11		7.1		8.7		8.7		10.3		11.1		12.9		15.3		3.2		3.2		2.8		3.5			***	12.7314		0			***	355.947			***	-3		1013.7		1.52
1984-11-20	5.4		6.6		4.3		5.3		5.3		9		10.4		12.8		15.2		1.5		1.8		1.4		7			***	20.8332		-1			***	334.311			***	-7		1014.4		1.42
1984-11-21	5.3		10.8			***	6.2		7		7.9		9.5		12.6		15.1		0		0.1		-2.8	*	0			***	72.9162		5			***	307.797			***	-9		1020.4		0.58
1984-11-22	4.7		13.7		-0.6		6		7		6.5		8.5		12.4		15		-1		-0.8		-1.8		0			***	123.842		20			***	281.582			***	-12		1022.8		0.57
1984-11-23	4.5		12.9		-3.5		5.7		6.3		5.7		7.6		12		14.9		-1.5		-1.3		-2.8		0			***	119.212		24			***	281.854			***	-10		1025.8		0.48
1984-11-24	8.2		12.6		3.4		8.2		8.4		7.7		8.4		11.6		14.7		3.1		3		1.8		0			***	38.1942		12			***	338.891			***	1		1016.1		0.63
1984-11-25	8.2		13.8		2.7		8.5		8.9		8.7		9.3		11.4		14.6		-1		-0.8		-1.8		0			***	87.9624		12			***	311.433			***	-4		1017		0.79
1984-11-26	2.2		9.1		-3.8		3.7		4.9		5.5		7.9		11.4		14.4		-5.2		-4.9		-6.1		0			***	121.527		17			***	266.969			***	-14		1022.3		0.64
1984-11-27	6.2		15.2		-0.8		6.2		6.6		6		7.3		11.1		14.3		-4.6		-4.4		-5.2		0			***	106.481		7			***	289.992			***	-6		1011.4		1.28
1984-11-28	3.4		9.6		-3.9		4.8		5.5		4.8		6.9		10.8		14.1		-6.4		-6.1		-6.8		0			***	118.055		16			***	271.447			***	-11		1019.5		0.58
1984-11-29	3		12.1		-2.8		4.2		5.2		4.6		6.5		10.5		14		-2.9		-2.9		-4.4		0			***	106.481		18			***	277.744			***	-9		1021.1		0.62
1984-11-30	4.4		15.1		-3.1		6.1		7.4		4.4		6.1		10.2		13.9		-2.5		-2.9		-3.9		0			***	115.74		21			***	279.12			***	-8		1020.1		0.55
1984-12-01	4.1		8.4		-2.6		4.4		5.2		4.4		5.9		9.9		13.7		0.5		0.2		-0.9		5			***	37.0368		0			***	318.273			***	-4		1012.1		0.59
1984-12-02	8.6		15.6		2.5		8.9		9.3		6.5		7.1		9.7		13.5		-0.4		-0.1		-1		1.5			***	109.953		14			***	300.354			***	-3		1004.1		0.92
1984-12-03	6.5		13.7		-0.4		7.9		8.5		5.8		7		9.6		13.4		-2.6		-2.6		-3.6		0			***	111.11		9			***	288.622			***	-7		1017.7		0.68
1984-12-04	4.1		13.2		-2		5.6		6.8		4.7		6.2		9.6		13.2		-0.9		-1		-2.5		0			***	104.166		16			***	283.422			***	-8		1022.1		0.55
1984-12-05	7.8		16.1		-0.3		8.6		9.1		6.1		6.7		9.4		13.1		2.9		2.6		1.2		0			***	91.4346		11			***	308.264			***	1		1012.6		0.8
1984-12-06	6.7		9.2		4.2		6.9		7.4		6.7		7.5		9.3		12.9		-1.5		-1.3		-1.9		0			***	42.8238		10			***	325.679			***	-3		1014.2		1.6
1984-12-07	4.7		8.8		-0.6		5		5.2		6.3		7.4		9.4		12.8		-5.7		-5.5		-6.4		0			***	107.638		13			***	278.978			***	-6		1023		0.74
1984-12-08	2.1		10		-4.5		3.7		5.2		4.5		6.2		9.4		12.7		-3.8		-3.7		-5		0			***	107.638		7			***	269.976			***	-7		1024.5		0.51
1984-12-09	3.4		13.1		-3.1		4.9		5.7		4.7		6.1		9.2		12.6		-1.1		-1.4		-3.3		0			***	98.379		3			***	281.735			***	-5		1023		0.52
1984-12-10	7.5		14.1		0.5		7.9		8.5		6.4		6.7		9		12.5		3.2		2.9		1.5		0			***	86.805		18			***	308.398			***	1		1021.9		0.62
1984-12-11	9.2		12.8		5.5		9.1		9.4		7.8		7.8		9		12.4		5.8		5.8		4.8		25			***	35.8794	***	6			***	343.788			***	4		1013.4		0.79
1984-12-12	13		17.7		9.2		12.9		13		10.6		9.7		9.1		12.2		7.7		7.6		6.7		2.5			***	94.9068	*	29			***	333.582			***	7		1002.3		1.15
1984-12-13	10.3		15		6.3		10.8		11.3		9.1		9.7		9.5		12		-0.7		-0.6		-1.3		0			***	109.953		1			***	304.105			***	-6		1012.8		0.9
1984-12-14	8.1		13.4		3		8.9		9.5		8.3		9		9.7		12		2.4		2.4		1.4		0			***	45.1386		-6			***	331.585			***	-3		1010.1		0.55
1984-12-15	4.7		7.9		2		5.1		5.5		6.9		8.1		9.8		12		-4.7		-4.3		-4.9		0			***	48.6108		0			***	310.652			***	-7		1014.1		0.69
1984-12-16	3.2		6.5		-0.1		3.1		3.3		6		7.3		9.6		12		-4.9		-4.4		-4.9		8.5			***	45.1386		6			***	305.907			***	-5		1015.7		0.77
1984-12-17	5.1		9.1		1.8		5.1		5.3		6.2		7.1		9.3		11.9		0.2		0.4		-0.3		13.5			***	92.592		29			***	290.994			***	-1		1007.8		1.05
1984-12-18	5.1		9.8		1.8		5.1		5.5		6.5		7.3		9.1		11.7		1.7		1.9		0.8		1.5			***	40.509		-6			***	319.541			***	-4		1002.3		0.94
1984-12-19	4.2		9.5		-1.7		4.8		5.2		5.5		6.9		9.1		11.7		-5.8		-5.5		-6.1		0			***	107.638		-8			***	273.967			***	-8		1010.5		1.03
1984-12-20	2.2		7.7		-2.3		2.8		3.5		4.5		6		8.9		11.6		-5.7		-5.3		-5.8		0			***	92.592		4			***	274.005			***	-5		1016.4		0.46
1984-12-21	1.5		6.6		-1.8		2.1		3		4.3		5.7		8.7		11.6		-3.9		-3.7		-4.6		0			***	48.6108		-10			***	296.425			***	-6		1010.8		0.63
1984-12-22	4.4		11.4		-0.5		5		5.6		4.9		5.7		8.4		11.6		-2.7		-2.6		-3.3		0			***	85.6476		1			***	288.615			***	-2		1004.6		0.84
1984-12-23	1		6.7		-4.4		2.4		3.2		4.3		5.7		8.3		11.5		-4.9		-4.7		-6		0			***	71.7588		-4			***	280.594			***	-7		1007.7		0.62
1984-12-24	0.4		8.3		-6.2		1.8		2.5		2.4		4.5		8.2		11.4		-8.4		-8.1		-9.1		0			***	114.583		-8			***	253.314			***	-8		1005.1		0.87
1984-12-25	-1		4.5		-6.2		-0.3		0.1		1.8		3.9		7.9		11.3		-13.4		-13		-13.5		0			***	114.583		-11			***	244.847			***	-8		1011.8		1.14
1984-12-26	-2.5		5.4		-8.8		-1.1		0		1		3.2		7.5		11.2		-9.4		-9.2		-10.3		0			***	90.2772		-9			***	254.395			***	-7		1012.4		0.64
1984-12-27	-1.3		6.9		-6.5		0.1		1.2		1.1		3		7.2		11.1		-8		-7.9		-9.1		0			***	93.7494		-7			***	257.898			***	-6		1010.8		0.7
1984-12-28	-0.3		7.5		-6.8		0.2		0.8		1.2		2.9		6.9		11		-7.9		-7.9		-9		0			***	104.166		1			***	256.302			***	-4		1005.6		0.7
1984-12-29	-0.4		6		-7.2		0.5		1.1		1.7		3.1		6.7		10.8		-9.4		-9.2		-9.9		0			***	108.796		2			***	252.587			***	-4		1007.4		0.66
1984-12-30	-1.2		7.3		-7.5		0.2		1		1.3		3		6.5		10.7		-9.1		-9.2		-10.1		0			***	109.953		-4			***	249.375			***	-4		1013.6		0.73
1984-12-31	-1.2		8.6		-8.4		0.6		1.7		1		2.7		6.4		10.5		-7.5		-7.6		-8.9		0			***	112.268		-2			***	249.448			***	-3		1016.4		0.52
1985-01-01	0.3		8.2		-6.7		1.5		2.3		1.1		2.7		6.2		10.4		-6.4		-6.7		-7.9		0			***	116.897		3			***	253.678			***	-3	***	1019.5		0.54
1985-01-02	0		8.9		-7.2		1.1		1.7		1.4		2.8		6		10.3		-8.3		-8.3		-9.2		0			***	116.897		3			***	251.223			***	-2	***	1020.7		0.74
1985-01-03	1		5		-1.5		1.3		1.5		2.2		3.1		5.9		10.1		-4.3		-4.5		-5.6		0			***	38.1942		2			***	300.307			***	-2	***	1015		0.61
1985-01-04	1.1		7.5		-3.5		1.7		2.4		2.3		3.3		5.9		10		-6.8		-6.5		-7.6		0			***	89.1198		4			***	270.84			***	-3	***	1009.1		0.53
1985-01-05	-1.9		4.5		-8		-0.6		0		1.1		2.9		5.8		9.9		-10.4		-10.3		-11.2		0			***	99.5364		-9			***	251.874			***	-4	***	1012.1		0.58
1985-01-06	-2.3		5		-9.2		-0.9		-0.2		0.7		2.4		5.8		9.8		-10.6		-10.3		-11.2		0			***	115.74		3			***	242.308			***	-3	***	1013.3		0.46
1985-01-07	-2.4		6.6		-9.7		-0.6		0.3		0.4		2.2		5.6		9.7		-11.4		-11.1		-12		0			***	119.212		0			***	239.947			***	-4	***	1016.3		0.6
1985-01-08	-1.5		6.7		-8.8		-0.3		0.7		0.3		2		5.5		9.6		-10.4		-10.3		-11.1		0			***	115.74		3			***	245.773			***	-4	***	1018.6		0.62
1985-01-09	-0.8		8.1		-7.8		1		2.1		0.5		2		5.3		9.5		-7		-7.6		-9.3		0			***	98.379		-3			***	259.428			***	-3	***	1016.9		0.54
1985-01-10	1.5		9.1		-3.5		2.8		3.7		1.2		2.3		5.2		9.4		-3.1		-3.6		-5.1		0			***	70.6014		4			***	285.466			***	-1	***	1009.1		0.63
1985-01-11	3.6		9.3		-4.4		4.2		4.6		1.8		2.6		5.1		9.3		-3.5		-3.6		-4.9		0			***	94.9068		9			***	281.382			***	-2	***	1010.8		1.11
1985-01-12	2.6		5		-0.9		2.6		2.7		3.2		3.6		5.1		9.1		-1.9		-2.3		-3.3		0			***	30.0924		-2			***	313.507			***	0	***	1010.7		1.14
1985-01-13	1.5		9.2		-2.5		2		2.5		2.6		3.4		5.2		9.1		-5.1		-5.1		-6.1		0			***	82.1754		12			***	278.642			***	-1	***	1005.3		0.97
1985-01-14	1		6.3		-7.3		0.9		1.2		1.9		3.2		5.3		9		-11.9		-11.7		-12.5		0			***	120.37		-10			***	253.033			***	-3	***	1005.5		1.53
1985-01-15	-2.4		5		-9.9		-1.3		-0.4		0.7		2.5		5.3		8.9		-10.3		-10.2		-11.6		0			***	121.527		0			***	241.643			***	-4	***	1015.3		0.82
1985-01-16	2		10.8		-6.7		2.6		3.1		1.1		2.4		5.2		8.9		-9.1		-9.1		-10		0			***	112.268		-2			***	263.469			***	-3	***	1008.5		1.08
1985-01-17	-0.2		5.5		-7		0.5		0.8		1		2.4		5		8.8		-13.7		-13.6		-14.3		0			***	124.999		-1			***	246.33			***	-3	***	1015.5		1.26
1985-01-18	-2.8		3.9		-10.9		-1.8		-1		0.2		1.9		5		8.7		-11.7		-11.8		-12.8		0			***	119.212		3			***	241.472			***	-5	***	1022.4		0.58
1985-01-19	-0.2		5.7		-6.5		0		0.4		0.5		1.8		4.8		8.7		-7.9		-8		-8.9		0			***	120.37		17			***	253.307			***	-3	***	1021.3		0.76
1985-01-20	3.7		10.3		-0.7		4.5		4.8		2.7		2.9		4.7		8.6		-4.2		-4.2		-5.1		0			***	100.694		18			***	280.754			***	0	***	1006.6		0.82
1985-01-21	2.8		8.3		-4.6		3.7		4		2.3		3.2		4.8		8.5		-11		-11		-11.8		0			***	124.999		-4			***	260.747			***	-2	***	1009.9		1.39
1985-01-22	-0.2		8		-7.8		1		2.1		1.2		2.6		4.9		8.4		-7.1		-7.1		-8.3		0			***	99.5364		10			***	264.62			***	-3	***	1013.9		0.51
1985-01-23	3		11		-4.8		3.1		3.4		2.3		2.9		4.8		8.4		-7		-7		-7.9		0			***	111.11		10			***	271.952			***	-1	***	1011.1		0.88
1985-01-24	1.8		4.4		-0.2		1.8		1.8		3		3.5		4.9		8.3		-6.9		-6.8		-7.7		0			***	47.4534		7			***	300.331			***	-1	***	1012.3		0.79
1985-01-25	-0.4		5.4		-7.3		-0.1		0.2		1.9		3.2		5		8.3		-13.6		-13.4		-14		0			***	131.944		15			***	245.71			***	-3	***	1014.3		1.09
1985-01-26	-2.4		6		-10.6		-1.5		-0.7		0.6		2.4		5		8.3		-13.6		-13.4		-14.3		0			***	135.416		12			***	237.549			***	-4	***	1019.4		1.11
1985-01-27	-1.4		4.2		-9.6		-0.6		0.1		0.3		1.9		4.9		8.2		-10		-9.8		-10.7		0			***	69.444		4			***	274.955			***	-4	***	1024		0.66
1985-01-28	3.2		10.1		-2.7		3.4		3.6		2.4		2.6		4.7		8.2		-3.2		-2.7		-3.7		1.5			***	101.851		35			***	281.872			***	1	***	1010		0.78
1985-01-29	-0.1		2.8		-5.3		-0.2		0		2.4		3.2		4.7		8.1		-5.1		-5		-6		0			***	20.8332		-2			***	307.538			***	-2	***	1007.8		0.65
1985-01-30	-2.7		3.3		-7.8		-3.2		-3		1.4		2.7		4.8		8.1		-11.6		-11.3		-11.9		1			***	152.777		3			***	232.311			***	-2	***	1007.7		1.54
1985-01-31	-1.8		6.8		-10.2		0.3		1.1		0.4		2.2		4.8		8		-11.8		-11.7		-12.3		0			***	138.888		16			***	241.655			***	-4	***	1011.7		0.78
1985-02-01	1.9		11.7		-6.3		3.6		4.7		0.8		2.1		4.7		8		-7.2		-7.2		-8.2		0			***	142.36		19			***	257.459			***	-3	*	1003.5		0.87
1985-02-02	4.4		11.9		-3.5		5.4		5.9		2.3		2.7		4.6		8		-5.4		-5.4		-6.2		0			***	129.629		31			***	274.52			***	0		1005.2		0.87
1985-02-03	3.8		11		-0.2		4.6		5.1		4		4		4.6		7.9		-1		-1		-2.2		1.5			***	101.851		26			***	288.323			***	2		1004.1		0.74
1985-02-04	3		10.7		-4.1		4.1		4.9		2.9		3.8		4.8		7.9		-2.5		-2.9		-4.5		0			***	136.573		21			***	269.897			***	-1		1009.9		0.63
1985-02-05	3.8		7		0.5		3.9		4.4		3.4		3.8		4.9		7.8		0.4		0.1		-0.7		2.5			***	17.361		4			***	328.564			***	-1		1011.3		1
1985-02-06	6.4		10.2		3.1		6.2		6.3		5.3		4.7		5		7.8		1		1.1		0.6		0			***	62.4996		24			***	319.513			***	4		1010.1		0.54
1985-02-07	9.2		14.2		5.9		8.9		9		6.8		6		5.2		7.8		1.2		1.2		0.7		0			***	122.684		29			***	306.361			***	5		1010.8		1.33
1985-02-08	6.2		7.3		5		6		6		6.2		6.3		5.6		7.8		-0.5		-0.4		-1		0.5			***	39.3516		11			***	329.365			***	-1		1018		2.19
1985-02-09	7.1		12.6		4.5		6.9		7		6.5		6.2		5.9		7.6		3.9		4.1		3.5		53			***	37.0368	***	5			***	336.145			***	2		1005.5		1.9
1985-02-10	8.8		14.1		3.7		8.5		8.5		8.4		7.7		6.1		6.8		4.3		4.6		4.1		4.5			***	106.481	*	40			***	315.198			***	5		989.5		1.25
1985-02-11	5.8		10		2.4		5.8		6.1		6.3		7.2		6.4		7		-7.6		-7		-7.4		0			***	159.721		20			***	270.418			***	-6		1003.1		2.51
1985-02-12	5		9.3		-2		5.5		5.9		5.4		6.1		6.6		7.2		-4.7		-4.5		-4.9		0			***	100.694		13			***	294.754			***	-1		1007.9		0.7
1985-02-13	4.5		13.4		-2.2		4.6		4.8		5.7		6.2		6.5		7.4		-1.3		-1.3		-2.1		10.5			***	143.518		31			***	278.65			***	0		998.9		1.02
1985-02-14	2.5		6.6		-0.4		2.2		2.4		4.8		6		6.5		7.5		-9.7		-9.1		-9.2		0			***	152.777		19			***	260.646			***	-4		1002.5		2.17
1985-02-15	3.5		8		-0.1		3		3.3		3.8		5.1		6.4		7.6		-10.6		-10.2		-10.5		0			***	160.879		15			***	261.21			***	-4		1007.1		2.62
1985-02-16	4.2		8.1		-1.3		4.3		4.6		4.1		4.8		6.2		7.8		-7		-6.9			***	0			***	65.9718		-2			***	307.196			***	-2		1006.7		0.76
1985-02-17	4.5		10.6		-1.9		4.9		5.3		4.7		5.1		6		7.8		-6.8		-6.6			***	0			***	146.99		23			***	274.583			***	0		1010.5		0.74
1985-02-18	3.5		9.2		-4		4.1		4.8		4.3		5		6		7.9		-5.9		-5.8		-6.7		0			***	121.527		22			***	281.827			***	0		1019.8		0.76
1985-02-19	5.2		7.2		3.4		4.5		4.7		5.1		5.4		6		7.8		0.8		1.2		0.4		35.5			***	21.9906		8			***	334.328			***	0		1014.2		1.93
1985-02-20	6.7		8.6		2.9		6.4		6.6		6.3		6.1		5.9		6.6		3.7		3.8		2.7		33.5			***	26.6202		8			***	340.082			***	2		1002.1		1.45
1985-02-21	5.1	*	11.1	*	1.7	*	4.5	*	4.6	*	5.7	*	6	*	5.8	*	6.2	*	-0.7		-0.4		-1.1		0			***	115.74		35			***	295.617			***	2		996.3		1.41
1985-02-22	2.6		7.5		-2.3		2.1		2.3		4.6		5.8		6.2		6.9		-12.1		-11.4		-12		0			***	179.397		22			***	253.882			***	-4		1000.2		2
1985-02-23	3.8		9.5		-0.9		2.1	***	2.4		3.9		5.3		6.2		7.1		-10.4		-9.9		-10.4		0			***	171.295		33			***	263.238			***	-2		1003		1.83
1985-02-24	3.4		7.4		-1.8		0	***	3.2		2		5.1		6		7.2		-11.9		-11.5		-12.2		0			***	179.397		26			***	258.357			***	-4		1010.4		1.92
1985-02-25	2.9		9		-4		1	***	3.6		2		4.8		5.9		7.4		-8.3		-8.1		-9.1		0			***	180.554		32			***	259.61			***	-1		1022		0.88
1985-02-26	3.3		8.9		-1.8		3.3		3.4		3		5.1		5.8		7.4		-6.2		-6.1		-7.1		0			***	140.045		25			***	277.553			***	0		1022.6		0.8
1985-02-27	3.4		8.6		-2.1		3.3		3.5		3		5.2		5.8		7.5		-3.9		-4		-5.2		0			***	133.101		30			***	282.592			***	1		1024.7		1.05
1985-02-28	2.5		3.9		0.6		2.2		2.2		2.8		5.2		5.9		7.6		-1.6		-1.3		-2.3		25			***	25.4628		10			***	320.667			***	-3		1020.6		0.95
1985-03-01	5		9.3		2.2		4.8		4.7		3.6		5.2		5.8		7.2		0.6		0.9		-0.1		4			***	69.444		32			***	315.901			***	3		1010.9		1.5
1985-03-02	5.3		7		1.3		5		5.1		3.6		5.5		5.8		7.3		2.3		2.3		0.9		2.5			***	19.6758		3			***	336.792			***	0		1010.2		0.5
1985-03-03	7.6		13.4		1		7.3		7.2		5.9		6.7		5.9		7.4		0		0.3		-0.5		0.5			***	126.157		40			***	307.408			***	5		1007.9		0.88
1985-03-04	4.3		9.9		-2.2		4.2		4.3		4.2		6.3		6.1		7.5		-7.1		-6.7		-7.4		0			***	171.295		38			***	272.899			***	0		1019		1.41
1985-03-05	4.4		7.1		1.8		4.1		4.1		4.1		6.1		6.3		7.5		-0.1		0.2		-0.9		2			***	30.0924		-3			***	328.446			***	-2		1014.8		0.71
1985-03-06	5		8.1		2.8		4.2		4		4.3		6.1		6.3		7.6		-2.9		-2.4		-3.2		0.5			***	84.4902		30			***	310.043			***	0		1019.7		1.44
1985-03-07	6		10.3		3.6		5.3		5.3		5		6.3		6.4		7.7		-0.6		-0.5			***	0	*		***	89.1198		28			***	314.378			***	2		1025.9		0.7
1985-03-08	6.4		10.8		0.7		6.3		6.7		4.8		6.3		6.5		7.8		0.2	***	4.5	***		***	0			***	50.9256		18			***	330.561			***	1		1022.8		0.64
1985-03-09	8.8		11.9		5.7		8		8		6.2		7.2		6.6		7.8		3.9		5		3.8		0.5			***	15.0462		10			***	356.384			***	2		1008.2		1.66
1985-03-10	6.4		10.9		3.3		5.7		5.6		5.8		7.2		6.8		7.9		-2		-0.8		-2.2		0			***	124.999		38			***	303.85			***	1		1024.2		1.35
1985-03-11	1.7		4.9		0.8		0.9		0.9		3.5		6.2		6.9		7.9		-2.3		-1		-2.5		23.5			***	25.4628		3			***	317.846			***	-6		1023.5		1.2
1985-03-12	3.4		6.9		0.6		3.5		3.7		3.3		5.3		6.8		7.7		-2.3		-1		-2.5		6			***	69.444		16			***	309.967			***		***	1018		0.68
1985-03-13	5.3		9.8		0.2		4.9		5.2		4.7		5.3		6.5		7.7		-1.4		-0.2		-1.5		0			***	84.4902		31			***	313.969			***		***	1025		0.65
1985-03-14	4.9		7.3		3.5		3.9		3.9		5.7		5.5		6.4		7.7		-0.1		1.1		-0.2		15.5			***	26.6202		9			***	332.956			***		***	1021.6		1.19
1985-03-15	4.9		9.1		3.3		3.7		3.6		6.1		5.6		6.4		7.5		-3.7		-2.5		-3.7		0			***	150.462		57			***	289.846			***		***	1028.6			***
1985-03-16	4.7		9		-1		3.3	***	4.1		6.3		5.9		6.5		7.6		-4.9		-3.7		-5.1		0			***		***	-3	***		***		***		***		***	1033.6		0.95	***
1985-03-17	5.3		7.5		1.7			***	4.6		6.4		6.1		6.6		7.5		-0.3		1		-0.4		30.5			***	46.296		15			***	328.201			***		***	1021.7		0.86
1985-03-18	10.1		15.8		3.4			***	9.6		8.7		7.3		6.6		7		3		3.9		2.5		1			***	215.276		90			***	301.214			***		***	1015.6		1.56
1985-03-19		***	8.6		5.2		4.6	***	5.7		7.7		7.5		6.9		7.4		-0.8		0.4		-0.8		9.5			***	23.148		6			***		***		***		***	1018.4		1.4
1985-03-20		***	11.8		5.3		6.4		6.3		8.3		7.5		7.1		7.5		-0.6		0.7		-0.5		0			***	157.406		57			***		***		***		***	1020.7		1.28
1985-03-21	7.8		9.1		5.6		7		7		8.2		7.7		7.3		7.6		2.3		3.5		2.2		8			***	47.4534		15			***	340.887			***		***	1014.9		1.02
1985-03-22	8		14.1		1.3		7.2		7.5		8.2		7.7		7.4		7.7		-0.7		0.2		-1.4		0			***	202.545		60			***	293.011			***		***	1016.6		1.46
1985-03-23		***	7.9		5.7		5		4.9		7.2		7.4		7.5		7.9		-4		-2.6		-3.7		0.5			***	45.1386		15			***		***		***		***	1023		1.75
1985-03-24		***	11.9		3.7		5.8		5.8		7.8		7.3		7.6		8		-3.4		-2.3		-3.3		0			***	181.712		51			***		***		***		***	1027.7		1.29
1985-03-25	9.5		15.8		-0.3		8.9		9.1		8.4		7.6		7.6		8.1		1		1.9		0.3		0			***	160.879		48			***	314.204			***		***	1024.3		1.56
1985-03-26	14.7		20.7		8.4		14.1		13.9		11.3		9.5		7.7		8.2		6.2		7.2		5.9		0			***	92.592		28			***	363.274			***		***	1009.6		2.9
1985-03-27	6.5		8.2		5.4		5.4		5.3		8.6		8.7		8.1		8.3		-1.6		-0.3		-1.5		5.5			***	23.148		6			***	342.671			***		***	1006.9		1.61
1985-03-28	7.6		10.3		3.3		7.2		7.1		8.6		8.1		8.2		8.4		2.1		2.9		1.6		0			***	83.3328		34			***	329.58			***		***	1005.4		1.5
1985-03-29	9.1		11.5		7		8.8		8.6		9.5		8.6		8.2		8.5		4.4		5.2		4.1		1			***	52.083		22			***	347.243			***		***	1006.4		0.91
1985-03-30	9.3		16.3		5.9		8.8		8.7		10.6		9.5		8.3		8.6		0		0.8		0		1.5			***	179.397		69			***	308.609			***		***	1006.7		1.44
1985-03-31	5.2		10.6		1.8		4.5		4.6		9.1		9.1		8.6		8.6		-0.7		0.2		-0.8		7			***	123.842		40			***	306.003			***		***	1012.9		1.26
1985-04-01	6.4		14.3		-0.8		6.4		7.1		8.9		8.6		8.7		8.7		-5.4		-4.3		-5.2		0			***	267.359		84			***	268.735			***		***	1020.8		0.78
1985-04-02	9.1		15.6		-0.4		8.8		9.2		9.4		8.8		8.7		8.8		-2.6		-1.7		-2.5		0			***	217.591		72			***	296.107			***		***	1025.9		1.65
1985-04-03	14.4		19.6		7.3		14.1		14		11.5		10		8.8		8.9		3.2		3.8		2.8		0			***	211.804		82			***	328.06			***		***	1023.8		1.9
1985-04-04	14.5		16.9		12.6		14.2		14.2		12.5		11		9		9		10		10.7		9.6		29			***	40.509		18			***	380.206			***		***	1010.9		1.34
1985-04-05	14.3		18.9		11.5		14		13.9		13.9		12.2		9.5		9		5.6		6.3		5.3		0			***	199.073		83			***	334.278			***		***	1008.3		1.46
1985-04-06	12.5		19.5		3.5		12.6		12.6		13.3		12.3		10		9.1		-1.7		-1.1		-1.7		0			***	269.674		89			***	299.364			***		***	1015.7		1.04
1985-04-07	12.5		14.8		10.8		12.2		12.1		12.7		12		10.3		9.2		6.3		6.8		6		5			***	42.8238		12			***	368.481			***		***	1013.2		1.09
1985-04-08	12.9		15		10.4		13		12.9		12.6		11.8		10.5		9.4		8.8		9.4		8.3		8			***	40.509		14			***	371.803			***		***	1005.1		1.56
1985-04-09	11.8		18		8		11.4		11.1		13.6		12.3		10.6		9.6		6.9		7.3		6.4		0.5			***	224.536		95			***	319.877			***		***	1009.3		1.6
1985-04-10	11.8		19.7		6.9		11.3		11.1		14		12.8		10.8		9.7		6.5		6.9		5.9		0			***	192.128		78			***	327.054			***		***	1014.3		1.48
1985-04-11	13.9		19.9		9.7		13.4		13.1		14.6		13.3		11.1		9.9		7.8		8.2		7.3		3			***	153.934		68			***	347.594			***		***	1012		1.53
1985-04-12	8.2		12.2		5.6		7.8		7.7		11.8		12.2		11.4		10		4		5		3.7		16.5			***	18.5184		6			***	353.585			***		***	1009.3		2.21
1985-04-13	9.3		13.2		6.1		8.9		8.8		11.2		11		11.4		10.1		2.6		3.6		2.4		0.5			***	69.444		30			***	344.262			***		***	1006.6		1.27
1985-04-14	9.1		13		6.4		8.6		8.6		11.4		11.2		11.2		10.3		1.9		2.6		1.5		0			***	256.943		101			***	295.868			***		***	1013.1		2.38
1985-04-15	9.9		14.1		5		9.4		9.2		11.9		11.2		11.1		10.4		3.1		3.7		2.7		4			***	148.147		65			***	326.794			***		***	1016.7		1.43
1985-04-16	11.6		15.2		7.8		11.1		10.9		12.6		11.8		11.1		10.4		6.4		7.1		6.1		4			***	108.796		41			***	347.244			***		***	1008.6		1.2
1985-04-17		***	18.8		6		11.5		11.4		13.6		12.4		11.2		10.5		2.7		3.3		2.3		0.5			***	278.933		107			***		***		***		***	1005.9		1.42
1985-04-18		***	13.9		6		9.1		9.2		12		12		11.4		10.6		3.8		4.9		3.9		6.5			***	60.1848		9			***		***		***		***	1007.3		1.07
1985-04-19	11.5		17		3.7		11.2		11.2		12.5		11.7		11.4		10.6		3.8		4.4		3		0			***	261.572		97			***	309.28			***		***	1016.9		1.21
1985-04-20	13.8		19.1		8.8		13.8		13.8		13.2		12.4		11.5		10.7		6.7		7.6		6.7		6			***	111.11		32			***	358.306			***		***	1009.7		1.05
1985-04-21	13.9		22		5.5		13.2		13.5		13.9		12.8		11.6		10.8		3.8		4.5		3.4		0			***	278.933		96			***	316.492			***		***	1011.3		1.58
1985-04-22	16.3		21.6		9.6		15		14.8		15.1		13.6		11.8		10.8		8.1		8.7		7.6		0.5			***	215.276		86			***	347.932			***		***	1011.3		1.63
1985-04-23		***	19.9		14.3		15.8		15.7		15.9		14.5		12.2		11.3		11.4		11.8		11		54.5			***	113.425		53			***		***		***		***	1004		1.3
1985-04-24		***	23.3		6.5		14		14.2		14.8		14.4		12.7		11.7		6.1		6.6		6.2		7			***	101.851		28			***		***		***		***	1003.2		1.39
1985-04-25	13.6		21.8		5.9		13.6		14		14.6		13.7		12.8		11.8		1.5		1.7		1.6		0			***	271.989		93			***	314.547			***		***	1011.5		0.95
1985-04-26	16.7		22.6		9.7		16.9		16.7		16		14.6		12.9		11.8		9		8.9		8.3		0			***	228.008		88			***	349.249			***		***	1009.4		2.34
1985-04-27	15.3		19.1		10.5		15.2		15		15.5		14.8		13.1		11.8		9.8		9.9		9.4		4.5			***	26.6202		2			***	389.22			***		***	1005.3		3.08
1985-04-28	13.7		19.1		9.3		13.1		12.9		15.3		14.5		13.2		11.8		3.9		3.9		3.6		0.5			***	270.832		103			***	319.455			***		***	1012.7		1.61
1985-04-29	14		22.1		5.4		14		14.2		15.5		14.6		13.3		11.8		4.1		4.2		3.6		0			***	287.035		97			***	317.979			***		***	1015.2		1.1
1985-04-30	14.9		23.4		6.7		14.9		15.1		15.9		14.9		13.4		11.9		4.5		4.5		3.9		0			***	260.415		88			***	328.569			***		***	1018.2		0.98
1985-05-01	17.9		25.9		9.6		17.2		17.2		16.8		15.4		13.6		12		6.6		6.5		6.1		0			***	262.73		103			***	345.377			***		***	1017.2		1.02
1985-05-02		***	27		14.4		18.9		18.8		18		16.3		13.8		12.1		9.5		9.4		8.8		0			***	245.369		102			***		***		***		***	1015.2		0.98
1985-05-03		***	27.7		11		19.2		19.2		17.9		16.6		14.1		12.2		8.7		8.5		7.6		0			***	253.471		103			***		***		***		***	1012.1		0.98
1985-05-04		***	24.3		12.5		17.4		17.4		17.4		16.6		14.4		12.3		7.5		7.4		6.9		0			***	275.461		113			***		***		***		***	1013.6		2.02
1985-05-05	19.1		25.2		12.7		17.6		17.2		18.1		16.7		14.7		12.4		9.6		9.5		9.1		0			***	207.175		101			***	368.076			***		***	1014.3		2.19
1985-05-06		***	24.9		15.1		20		19.7		18.8		17.3		14.9		12.5		12.4		12.4		12.1		1			***	114.583		56			***		***		***		***	1007.1		2.11
1985-05-07		***	15.7		13.5		12.8		12.6		16.3		16.3		15.1		12.7		9.4		9.3		8.8		1			***	43.9812		23			***		***		***		***	1007.5		1.62
1985-05-08	16.3		23.9		13		15		14.7		17.5		16.3		15.1		12.8		7.9		7.7		7.3		0.5			***	265.045		130			***	340.589			***		***	1008.9		1.43
1985-05-09		***	25.7		13.8		18.2		17.9		18.6		17.1		15.2		12.9		8.6		8.6		8.2		0			***	255.785		116			***		***		***		***	1012.2		1.25
1985-05-10		***	22.8		16.2		17.9		17.7		18		17.1		15.4		13		10		9.9		9.5		0			***	149.305		56			***		***		***		***	1014.1		1.37
1985-05-11		***	23.3		14.8		17.1		17		18.4		17.2		15.5		13.2		10.1		10.1		10		1.5			***	184.027		82			***		***		***		***	1011.2		0.77
1985-05-12		***	24.8		11.6		17.3		17.3		18.6		17.4		15.7		13.3		9.6		9.6		9.1		0.5			***	284.72		116			***		***		***		***	1014.7		1.15
1985-05-13	18.4		23.2		13.6		17.5		17.2		18.5		17.4		15.8		13.4		11.3		11.1		10.7		0			***	151.619		68			***	379.037			***		***	1011.4		1.59
1985-05-14	17.7		18.7		16.9		17.7		17.5		18.5		17.5		16		13.5		13.7		13.7		13.3		6			***	55.5552		24			***	396.93			***		***	1003.4		1.04
1985-05-15	19.5		28.7		14		19.7		19.5		19.6		18		16		13.6		4.6		4.7		5		0.5			***	319.442		136			***	340.455			***		***	1007		0.96
1985-05-16	15.6		20.5		9.5		15.5		15.5		17.7		17.6		16.2		13.7		-2.4		-2.2		-1.6		0			***	321.757		122			***	312.067			***		***	1020.3		1.32
1985-05-17	16.7		25		7		16.7		16.7		17.7		17		16.3		13.8		4		4		4		0			***	310.183		118			***	329.285			***		***	1023.8		1.01
1985-05-18	18.8		24.3		11		18.7		18.5		18.5		17.4		16.3		13.9		9.4		9.2		8.6		0			***	262.73		102			***	357.222			***		***	1018.3		1.56
1985-05-19	20.7		24.1		17.3		19.8		19.3		19.3		18		16.4		14.1		10.2		10.1		9.9		0			***	239.582		100			***	372.406			***		***	1012.2		2.84
1985-05-20	20.5		21.7		19.3		19.6		19.4		19.2		18.1		16.6		14.2		16		15.9		15.5		22.5			***	43.9812		17			***	415.694			***		***	1003.8		2
1985-05-21		***	16		13.6		13.7		13.5		17.5		17.4		16.7		14.2		9.9		10		9.7		7.5			***	57.87		30			***		***		***		***	1004.9		1.71
1985-05-22		***	20.4		12.4		15.2		15		17.6		16.9		16.7		14.3		9.6		9.5		9		0			***	137.731		63			***		***		***		***	1009.2		0.81
1985-05-23	19.5		26.5		12		19.7		19.7		19.2		17.7		16.6		14.4		12.3		12.1		11.3		0			***	276.619		121			***	363.488			***		***	1013		0.64
1985-05-24	20.3		24		16.5		19.7		19.5		19.4		18.2		16.6		14.5		14.8		14.8		14.4		14			***	86.805		38			***	405.784			***		***	1011.8		0.76
1985-05-25	22.1		24.3		19.5		21.1		20.8		20.1		18.8		16.8		14.6		17.2		17.4		16.9		4.5			***	55.5552		28			***	423.031			***		***	1004.6		1.82
1985-05-26	22.3		27.1		17.9		21.4		21.2		21		19.4		17.1		14.7		14.5		14.5		14.1		0			***	168.98		84			***	400.677			***		***	1001.9		1.27
1985-05-27	20.3		25		14.1		19.6		19.4		20.4		19.4		17.3		14.8		6.6		6.8		6.8		0			***	288.193		127			***	355.814			***		***	1004.1		1.05
1985-05-28		***	22		16.1		18.4		18.2		19.4		18.8		17.5		14.9		8.8		9		8.7		0			***	188.656		87			***		***		***		***	1006.1		1.62
1985-05-29		***	18.3		13.1		15.3		15.2		18.4		18.2		17.5		15		11.5		11.7		11.3		18			***	41.6664		14			***		***		***		***	1002.7		0.93
1985-05-30	14.9		18.7		9.3		13.9		13.7		17.8		17.5		17.5		15.1		6.6		6.8		6.4		0			***	312.498		140			***	326.272			***		***	1008.3		1.58
1985-05-31	16.9		20.9		12.6		15.9		15.7		18.1		17.5		17.3		15.2		7.8		7.9		7.6		0			***	240.739		106			***	351.157			***		***	1011.2		1.2
1985-06-01	17.9		22.3		13		17.3		17.2		18.6		17.7		17.3		15.3		9.4		9.4		9		0			***	243.054		107			***	357.877			***		***	1011.1		1.03
1985-06-02	19.6		25.3		12		18.9		18.9		19.1		18		17.2		15.3		11.1		11		10.3		0			***	251.156		112			***	367.421			***		***	1011.5		0.8
1985-06-03		***	26.3		18.5		20.9		20.7		20.4		18.9		17.3		15.3		13.6		13.6		13.2		0			***	208.332		97			***		***		***		***	1008.5		0.71
1985-06-04		***	27		17.1		20.8		20.7		21		19.6		17.5		15.4		11.8		11.8		11.6		0.5			***	252.313		114			***		***		***		***	1006.8		0.91
1985-06-05	21.7		29.9		14.1		21.6		21.6		20.8		19.6		17.8		15.4		8.4		8.3		8		0			***	319.442		140			***	360.672			***		***	1006.6		0.65
1985-06-06	23.3		32		14.7		23.5		23.5		21		19.8		18		15.5		9.8		9.6		9.3		0			***	302.081		130			***	374.553			***		***	1005.5		0.99
1985-06-07	23.4	***	30.8	***	15.3	***	22.9		22.8		21.2		19.9		18.2		15.6		13.5		13.4		12.8		0			***	249.998		104			***	391.229			***		***	1005.1		1.13
1985-06-08		***	21.3	***	18.6	***	18.7		18.4		20.2		19.7		18.3		15.7		13.8		13.8		13.3		1			***	50.9256		11			***		***		***		***	1006.5		1.13
1985-06-09		***	20.5	***	17.5	***	17.6		17.3		19.8		19.2		18.4		15.8		13.7		13.8		13.5		4.5			***	69.444		32			***		***		***		***	1007.6		0.87
1985-06-10		***	20.9	***	16.9	***	17.5		17.1		19.4		18.9		18.3		15.9		12.8		12.6		12.2		0			***	86.805		47			***		***		***		***	1010.6		1.42
1985-06-11		***	21	***	15.7	***	16.6		16.3		19.1		18.5		18.2		15.9		11		10.9		10.7		1			***	126.157		66			***		***		***		***	1010.1		1.11
1985-06-12		***	20.9	***	15.9	***	16.8		16.5		19		18.4		18.1		16		11.7		11.7		11.4		6.5			***	135.416		71			***		***		***		***	1008.7		1.21
1985-06-13		***	17.8	***	15.3	***	15.5		15.3		18.3		18.1		18		16		11.6		11.7		11.3		21.5			***	56.7126		26			***		***		***		***	1008.5		1.89
1985-06-14		***	17	***	14	***	14.1		13.9		17		17.1		17.9		16.1		8		8.1		7.7		10			***	64.8144		29			***		***		***		***	1006.8		1.84
1985-06-15		***	18.7	***	13.7	***	14.3		14		17.1		16.8		17.6		16.2		5.4		5.4		5.2		0			***	182.869		96			***		***		***		***	1012.4		1.62
1985-06-16		***	22	***	11.6	***	15.8		15.8		17.9		17.2		17.4		16.2		7.4		7.5		7.3		0			***	270.832		115			***		***		***		***	1014.8		0.85
1985-06-17	17	***	22.6	***	10.4	***	16.3		16.5		17.8		17.2		17.4		16.2		7.7		7.9		7.3		0			***	269.674		114			***	347.041			***		***	1015.5		1.12
1985-06-18	17.7	***	20.5	***	15.4	***	16.8		16.6		17.9		17.4		17.4		16.1		12		12.1		11.4		6			***	67.1292		31			***	394.786			***		***	1014.1		0.88
1985-06-19	20.5	***	23.7	***	18	***	19.6		19.3		19.2		18		17.4		16.2		15.5		15.6		14.9		22.5			***	90.2772		51			***	407.183			***		***	1006.4		1.19
1985-06-20	19.8	***	24.1	***	17.5	***	18.7		18.4		19.2		18.3		17.6		16.9		14.5		14.7		14.1		62.5			***	116.897		61			***	397.751			***		***	1007		1.41
1985-06-21		***	22.5	***	19	***	19		18.6		19.6		18.6		17.8		17.1		15.4		15.4		14.6		0			***	75.231		44			***		***		***		***	1009.6		1.03
1985-06-22		***	28.2	***	20.5	***	22.7		22.4		21.2		19.4		17.9		17		18.2		18.2		17.6		3.5			***	136.573		75			***		***		***		***	1005		0.66
1985-06-23		***	28.2	***	21.9	***	23.5		23.2		22.4		20.6		18.2		17		18		18		17.5		14			***	150.462		77			***		***		***		***	1006.5		0.71
1985-06-24		***	22.7	***	20.3	***	20.2		19.9		21.5		20.7		18.6		17.1		16.6		16.8		16.1		12.5			***	81.018		45			***		***		***		***	1007.8		1.8
1985-06-25		***	23	***	20.5	***	20		19.7		20.9		20.1		18.9		17.4		16.6		16.7		16		13.5			***	52.083		26			***		***		***		***	1003.6		1.16
1985-06-26		***	27.9	***	20.4	***	22.6		22.2		21.9		20.5		18.9		17.8		17		16.9		16.4		5.5			***	192.128		99			***		***		***		***	1001		0.68
1985-06-27		***	24.1	***	19.7	***	20.6		20.3		21.7		20.9		19.1		17.7		14.9		15.1		14.3		0.5			***	143.518		74			***		***		***		***	1002.5		1.81
1985-06-28		***	19.9	***	17.9	***	17.7		17.4		20		19.9		19.3		17.9		14		14.3		13.5		33			***	37.0368		17			***		***		***		***	1002.2		1.54
1985-06-29		***	22.2	***	18.2	***	18.9		18.5		19.9		19.4		19.2		18.3		14.2		14.3		13.5		0			***	82.1754		44			***		***		***		***	1007.7		0.96
1985-06-30	21.6	***	25.1	***	20.4	***	20.2		19.8		20.2		19.6		19.1		18.5		17.3		17.5		16.6		95.5			***	27.7776		16			***	425.662			***		***	1004.5		1.28
1985-07-01		***	33	***	22.2	***	26.8		26.7		23.2		21.2		19.1		18.7		15.6		15.7		15.6		34.5			***	277.776		157			***		***		***		***	991.1		2.52
1985-07-02		***	23.2	***	19.2	***	21.1		21		22		21.3		19.4		18.7		16.3		16.2		15.4		1.5			***	65.9718		21			***		***		***		***	1007.1		0.59
1985-07-03		***	25.4	***	19	***	21.2		21		21.9		20.9		19.6		18.8		17.3		17.1		16.3		0.5			***	119.212		55			***		***		***		***	1007.2		0.69
1985-07-04		***	23.2	***	20.5	***	20.9		20.5		22		21.1		19.7		18.6		17.3		17.3		16.6		3.5			***	56.7126		31			***		***		***		***	1003.5		1.31
1985-07-05		***	22.5	***	20.4	***	20.1		19.7		21.3		20.7		19.8		18.5		16		16.2		14.8		0			***	42.8238		23			***		***		***		***	1008		1.09
1985-07-06	24.8	***	28.7	***	21.1	***	23.8		23.5		22.7		21.2		19.8		18.4		18.8		19.3		17.9		0			***	135.416		70			***	426.045			***		***	1002.5		0.58
1985-07-07		***	26.5	***	23.4	***	23.6		23.4		23		21.8		19.9		18.3		19.6		19.9		18.6		0.5			***	71.7588		29			***		***		***		***	1003.5		0.64
1985-07-08		***	24.8	***	20.9	***	22.4		22.1		22.8		21.8		20		18.2		18.4		18.8		17.2		1			***	92.592		43			***		***		***		***	1001.6		1.11
1985-07-09		***	31.9	***	20.2	***	24.2		23.8		23.6		22.1		20.1		18.2		17.1		17.5		16.4		0			***	249.998		122			***		***		***		***	1005.4		0.85
1985-07-10		***	28	***	22	***	24.1		23.6		23.5		22.3		20.3		18.2		18.9		19.2		17.7		0			***	101.851		49			***		***		***		***	1006.3		0.92
1985-07-11		***	30.4	***	24.2	***	25.5		25.2		24		22.7		20.5		18.2		21.4		21.7		20.1		7			***	111.11		54			***		***		***		***	999.1		1.04
1985-07-12		***	29.3	***	24.5	***	25.7		25.3		24.5		23.1		20.6		18.2		21.3		21.4		19.9		0			***	116.897		55			***		***		***		***	997.8		0.78
1985-07-13		***	24.4	***	23.3	***	22.5		22.1		23.5		22.8		20.8		18.2		19.3		19.7		18.3		9			***	34.722		12			***		***		***		***	996.7		0.95
1985-07-14		***	31.4	***	20.2	***	24.9		24.5		24.5		23		20.9		18.3		19.3		19.8		18.6		4.5			***	224.536		124			***		***		***		***	994.7		1.15
1985-07-15		***	31.9	***	20	***	24.5		24.2		24.6		23.3		21		18.3		14.5		14.9		14.5		0.5			***	304.396		162			***		***		***		***	1001.1		0.73
1985-07-16		***	31.6	***	19.4	***	24.4		24.2		24.3		23.3		21.2		18.4		15.9		16.3		15.1		0			***	276.619		141			***		***		***		***	1004.1		0.97
1985-07-17	26.2	***	31.2	***	22	***	24.9		24.5		24.4		23.3		21.3		18.5		18.2		18.5		17.1		0			***	178.24		91			***	426.013			***		***	1002		1.11
1985-07-18		***	32.4	***	23.9	***	27.1		26.6		25.6		23.9		21.4		18.5		20.5		20.8		19.4		0			***	247.684		129			***		***		***		***	1000.1		1.36
1985-07-19	28.4	***	33.7	***	23.3	***	27.6		27.3		25.9		24.4		21.5		18.6		20.1		20.3		18.8		0			***	271.989		151			***	427.693			***		***	1006.3		0.98
1985-07-20		***	30.9	***	23.5	***	25.5		25		25.7		24.4		21.7		18.7		19.8		20		18.5		0			***	219.906		127			***		***		***		***	1013.2		1.22
1985-07-21	26.3	***	31.2	***	22.7	***	25		24.6		25.5		24.4		21.9		18.8		20.4		20.5		19.2		1.5	*		***	188.656		107			***	428.279			***		***	1015		0.8
1985-07-22	26.4	***	31.9	***	22.4	***	25.4		25.1		25.3		24.2		22.1		18.9		19		19.1		18.3		0			***	207.175		114			***	423.758			***		***	1012.4		0.76
1985-07-23	27.3	***	33.1	***	22	***	26.2		25.8		25.9		24.5		22.1		18.9		19.1		19		18.1		0			***	276.619		149			***	418.509			***		***	1009		0.7
1985-07-24		***	33.2	***	22.9	***	27		26.7		26		24.7		22.3		19		20.2		20.2		19.2		0			***	254.628		133			***		***		***		***	1006.3		0.74
1985-07-25		***	33.3	***	22.6	***	27.2		26.8		25.9		24.8		22.4		19.1		19.4		19.4		18.6		0			***	285.878		149			***		***		***		***	1005.9		0.77
1985-07-26	27.5	***	32.7	***	23.2	***	26.4		26		26		24.8		22.5		19.2		20.9		20.8		19.8		0			***	293.98		155			***	421.093			***		***	1007.6		0.97
1985-07-27	28.1	***	32.8	***	23.8	***	27.1		26.7		26.2		25		22.6		19.3		20.7		20.6		19.7		0			***	266.202		138			***	427.709			***		***	1010		0.84
1985-07-28		***	34.3	***	23.1	***	27.7		27.4		26.4		25.1		22.7		19.4		20.4		20.7		19.3		0			***	285.878		148			***		***		***		***	1009.4		0.64
1985-07-29	29	***	35.9	***	22.5	***	28.5		28.1		26.4		25.1		22.8		19.5		20.2		21		19.4		0			***	267.359		138			***	431.247			***		***	1005.3		0.69
1985-07-30		***		***	24.6	***	28.4		27.8		26.9		25.5		22.9		19.5		21.2		22		20.5		0			***	255.785		138			***		***		***		***	1004.6		1.11
1985-07-31		***	33	***	25.3	***	27.8		27.2		26.9		25.6		23		19.6		21.8		22.5		20.8		0			***	202.545		102			***		***		***		***	1006.4		0.85
1985-08-01		***	30.8	***	25.5	***	26.3		25.7		26.5		25.4		23.1		19.7		21.6		22.4		20.7		0			***	166.666		90			***		***		***		***	1009.5		1.34
1985-08-02		***	33.8	***	25.3	***	27.7		27.1		26.7		25.5		23.2		19.8		21.5		22.2		20.4		0			***	178.24		91			***		***		***		***	1010.4		0.94
1985-08-03		***	34.9	***	23.3	***	27.9		27.4		26.7		25.5		23.2		19.9		20.2		20.9		19.3		0			***	271.989		137			***		***		***		***	1010.3		1.09
1985-08-04		***	34.9	***	24.1	***	27.9		27.4		26.8		25.5		23.3		20		20.9		21.7		20		0			***	237.267		119			***		***		***		***	1009.1		1.06
1985-08-05		***	33.4	***	24.4	***	27.7		27.2		26.7		25.6		23.4		20		21.5		22.4		20.6		0			***	229.165		115			***		***		***		***	1008.6		1.08
1985-08-06		***	32.6	***	25.2	***	27.7		27.1		26.9		25.7		23.4		20.1		21.3		22.1		20.5		0			***	188.656		93			***		***		***		***	1007		1.66
1985-08-07		***	32.8	***	25.8	***	27.6		27		26.9		25.7		23.5		20.2		21.4		22		20.6		0			***	201.388		101			***		***		***		***	1007.1		1.75
1985-08-08		***	34.5	***	25	***	28.2		27.6		27.3		25.9		23.5		20.2		20.9		21.3		20.1		0			***	269.674		136			***		***		***		***	1010.3		1.59
1985-08-09		***	32	***	24.1	***	27.1		26.6		26.5		25.6		23.6		20.3		21.1		21.1		20.1		0			***	200.23		96			***		***		***		***	1013		1.05
1985-08-10		***	30.7	***	24.6	***	25.8		25.4		25.9		25.3		23.6		20.4		21.3		21.2		20.3		11			***	158.564		78			***		***		***		***	1011.8		0.92
1985-08-11	25.9	***	28.5	***	24.5	***	24.8		24.4		25.3		24.8		23.6		20.4		21.8		21.7		20.4		15			***	68.2866		30			***	444.646			***		***	1008		1.22
1985-08-12		***	31.9	***	25.1	***	27.3		26.7		26.3		25		23.5		20.5		22.1		21.5		20.7		0			***	195.601		109			***		***		***		***	1010.5		1.14
1985-08-13	28.5	***	32.9	***	24.7	***	27.6		27.2		26.5		25.4		23.4		20.5		22		21.5		20.7		0			***		***	78			***		***		***		***	1011.9		0.68
1985-08-14		***	33.7	***	24.7	***	27.6		27.1		26.8		25.6		23.5		20.6		20.9		20.4		19.7		0			***	226.85		120			***		***		***		***	1009.7		0.94
1985-08-15		***	33.7	***	23.5	***	27.5		27.1		26.7		25.6		23.6		20.6		22.1		21.7		20.7		0			***	211.804		112			***		***		***		***	1008.3		0.83
1985-08-16		***	33.9	***	25.6	***	28.3		27.8		27.1		25.9		23.6		20.7		22.2		21.8		21		0			***	244.211		129			***		***		***		***	1009.5		0.96
1985-08-17		***	33.8	***	25.4	***	28.4		27.8		27		25.9		23.7		20.7		22.9		22.5		21.5		0			***	190.971		96			***		***		***		***	1010.4		0.75
1985-08-18		***	35.5	***	25.7	***	29		28.5		27.4		26.1		23.8		20.8		22.6		22.2		21.4		0			***	246.526		133			***		***		***		***	1010		0.68
1985-08-19		***	31.8	***	25.8	***	27		26.5		26.9		26		23.9		20.8		20		19.8		19		0			***	254.628		143			***		***		***		***	1011.5		1.72
1985-08-20		***	27.8	***	24.2	***	24.7		24.3		25.6		25.3		23.9		20.9		19.6		19.3		18.5		10.5			***	81.018		43			***		***		***		***	1014		1.04
1985-08-21		***	30.4	***	23.7	***	21.4	*	25		25.5		24.9		23.8		20.9		18.4		18		17.4		0			***	174.767		87			***		***		***		***	1014		0.61
1985-08-22		***	31.2	***	22.6	***	25.4	*	24.9		25.5		24.8		23.7		20.9		18.5		18.3		17.6		0			***	241.897		122			***		***		***		***	1014.5		0.85
1985-08-23		***	30.8	***	19.8	***	24.9		24.6		24.9		24.5		23.6		21		17		16.7		15.9		0			***	260.415		123			***		***		***		***	1015.9		0.69
1985-08-24		***	32.9	***	18.8	***	25.3		25.2		24.4		24		23.5		21		17.5		17		16		0			***	251.156		116			***		***		***		***	1013.2		0.66
1985-08-25		***	33	***	20.4	***	25.6		25.4		24.7		24.1		23.3		21		18.7		18.3		17.3		0			***	222.221		103			***		***		***		***	1010		0.69
1985-08-26		***	33.5	***	21	***	23.1	*	25.9		24.8		24.1		23.2		21		18		17.7		16.6		0			***	251.156		119			***		***		***		***	1007.7		0.79
1985-08-27		***	33.2	***	22.6	***	24	*	25.6		25.1		24.2		23.2		21		19.7		19.3		18.4		0			***	208.332		97			***		***		***		***	1003.1		1.21
1985-08-28	26.6	***	33.6	***		***	26.7	*	25.3	*	25.4	*	24.4	*	23	*	20.8	*	18.7		18.4		17.3		0			***	234.952		112			***	415.636			***		***	1003.1		1.48	*
1985-08-29		***	35.1	***	22.9	***	29		27.7		25.9		24.7		23.2		21		21.3		20.9		19.9		0			***	237.267		121			***		***		***		***	1007.6		1.03	***
1985-08-30		***	31.2	***	24.9	***	26.3		26		25.9		25		23.3		21		22.5		22.3		21.2		31			***	149.305		75			***		***		***		***	1010.4		1.35
1985-08-31		***	32.9	***	24.9	***	27.5	*	27		25.8		24.8		23.5		21.6		22.5		22.3		21.3		58.5			***	219.906		116			***		***		***		***	1005.6		3.52
1985-09-01		***	34.7	***	26.6	***	29		28.5		26.8		25.5		23.6		21.7		22.1		21.7		20.9		0			***	248.841		122			***		***		***		***	1006.1		2.4
1985-09-02		***	33.9	***	24.8	***	26.9		26.4		26.2		25.5		23.7		21.6		20.7		20.1		19.3		0			***	239.582		124			***		***		***		***	1011.1		1.19
1985-09-03		***	28.9	***	24.1	***	24.6		24.1		25.4		24.9		23.8		21.5		19.3		18.9		18.1		0			***	116.897		64			***		***		***		***	1016.7		1
1985-09-04		***	32.4	***	24.5	***	26.4		26		25.7		24.8		23.7		21.5		21		20.5		19.6		0			***	150.462		78			***		***		***		***	1013.3		0.67
1985-09-05		***	34.7	***	24.5	***	27.7		27.3		26.2		25.1		23.7		21.5		21.9		21.4		20.4		0			***	200.23		103			***		***		***		***	1009.6		0.76
1985-09-06		***	31.9	***	23.6	***	26.3		25.9		25.9		25.2		23.7		21.5		19.5		19.2		18.5		0.5			***	211.804		110			***		***		***		***	1010.1		1.21
1985-09-07		***	31.6	***	23.1	***	25		24.6		25.4		24.9		23.7		21.5		20.3		20		19.2		6.5			***	175.925		96			***		***		***		***	1005.5		1.6
1985-09-08		***	32.1	***	22.1	***	25.1		24.8		25.5		24.8		23.7		21.5		18.4		17.9		17.3		0			***	225.693		109			***		***		***		***	1005.4		0.81
1985-09-09		***	30.2	***	19.9	***	23.8		23.7		24.2		24.1		23.7		21.5		15.4		15.1		14.7		0			***	188.656		89			***		***		***		***	1011.4		0.6
1985-09-10		***	30.5	***	20.8	***	24.7		24.6		24.2		23.8		23.5		21.5		17.9		17.5		16.9		0			***	166.666		82			***		***		***		***	1011		0.71
1985-09-11		***	27.2	***	21.8	***	22.6		22.2		23.8		23.6		23.4		21.5		16.9		16.6		15.8		0			***	82.1754		38			***		***		***		***	1004.3		1.3
1985-09-12		***	28.3	***	21.5	***	22.9		22.7		23.6		23.3		23.3		21.5		17.5		17		16.3		0			***	131.944		62			***		***		***		***	1001.7		0.61
1985-09-13		***	29	***	19.5	***	23.1		22.8		22.7		22.7		23.1		21.4		10.4		10.2		9.9		0			***	240.739		100			***		***		***		***	1006.2		0.87
1985-09-14		***	26.5	***	19.4	***	21.3		21		22.4		22.4		22.8		21.4		12.9		12.6		12.1		0			***	194.443		88			***		***		***		***	1013.9		1.04
1985-09-15		***	21.7	***	18.4	***	18.3		18.1		21.4		21.7		22.6		21.4		14.5		14.3		13.5		7.5			***	43.9812		16			***		***		***		***	1019.1		0.54
1985-09-16		***	20.2	***	18.6	***	18		17.7		21.1		21.2		22.4		21.3		15.2		15		13.3		2.5			***	27.7776		10			***		***		***		***	1015.1		0.61
1985-09-17		***	25.4	***	19.3	***	20.4		20.2		21.2		21.1		22.1		21.3		12.9		12.9		11.3		0.5			***	162.036		80			***		***		***		***	1017.6		0.74
1985-09-18		***	23.3	***	19.4	***	19.4		19.2		21.1		21		21.9		21.2		15.6		15.3		13.6		0.5			***	54.3978		29			***		***		***		***	1011.1		0.56
1985-09-19		***	27.8	***	20.3	***	21.7		21.4		21.9		21.3		21.7		21.1		16.9		16.4		14.7		0			***	123.842		67			***		***		***		***	1009.1		0.66
1985-09-20		***	27.8	***	21.5	***	21.9		21.5		22.3		21.7		21.6		21		17.5		17.1		15.3		0			***	98.379		52			***		***		***		***	1007.5		1.12
1985-09-21		***	25.6	***	21.1	***	21.6		21.3		22.1		21.6		21.6		20.9		16.5		16.2		14.5		0.5			***	79.8606		42			***		***		***		***	1014.6		0.6
1985-09-22		***	22.4	***		***		***		***		***		***		***		***	9.2	***	9.2	***	8.3	***	6.5	***		***	9.2592	***	3	***		***		***		***		***		***	0.4
1985-09-23		***	19.8	***		***		***		***		***		***		***		***	7.1	***	6.9	***	6.4	***		***		***		***	-3	***		***		***		***		***		***	0.25	***
1985-09-24		***	18.9	***	15.6	***	15.4		15.1		19.2		19.6		21.3		20.8		12.1		12.3		10.8		12.5			***	34.722		18			***		***		***		***	1015.6		1.11	***
1985-09-25		***	23.5	***	17.5	***	19		18.7		19.7		19.5		20.9		20.7		14.3		14.3		12.9		1.5			***	74.0736		41			***		***		***		***	1013.3		0.68
1985-09-26		***	28.1	***	19.1	***	20.9		20.7		20.8		20.1		20.7		20.6		14.5		14.3		13.1		0			***	192.128		91			***		***		***		***	1016.7		0.68
1985-09-27		***	22.3	***	19.4	***	18.7		18.3		20		20		20.7		20.5		9.5		9.4		8.1		0			***	108.796		51			***		***		***		***	1020.7		1.62
1985-09-28		***	20.6	***	17.5	***	17.4		17.2		19.3		19.4		20.6		20.4		11.3		11.3		10		3			***	26.6202		8			***		***		***		***	1016.5		0.71
1985-09-29		***	19.9	***	17.5	***	16.8		16.6		19		19.1		20.4		20.3		13.8		13.7		12.3		20.5			***	17.361		7			***		***		***		***	1007.3		1.19
1985-09-30		***	24.9	***	17.5	***	19.3		18.9		19.4		19		20.1		20.3		14.2		14.1		12.6		2			***	116.897		56			***		***		***		***	1008.1		1.12
1985-10-01		***	27.7	***	17.7	***	20.9		20.7		20		19.5		20		20.2		13.9		13.8		12.4		0			***	140.045		56			***		***		***		***	1006.4		0.86
1985-10-02		***	26.2	***	12.7	***	18.3		18.4		19		19.1		20		20.1		8.2		8.4		7.5		0			***	193.286		68			***		***		***		***	1011		0.55
1985-10-03	17.5	***	25.9	***	8.5	***	17.6		17.8		17.8		18.2		19.8		20		9.5		9.3		8.2		0			***	204.86		70			***	348.478			***		***	1016.4		0.54
1985-10-04	18.6	***	23.4	***	12.7	***	18.2		18.4		17.9		18		19.6		19.9		12.1		12.1		11.2		0			***	85.6476		31			***	388.53			***		***	1015.8		0.35
1985-10-05		***	22	***	17.4	***	18.1		17.9		18.5		18.3		19.4		19.8		13.3		13.3		12.4		0.5			***	43.9812		12			***		***		***		***	1016		0.54
1985-10-06		***	19.8	***	16.3	***	16.7		16.4		18.2		18.1		19.3		19.7		13.7		13.7		12.6		17.5			***	39.3516		20			***		***		***		***	1011.8		1.51
1985-10-07		***	25.6	***	16.6	***	19.1		18.9		18.9		18.4		19.1		19.6		14.8		14.5		13.4		0.5			***	135.416		56			***		***		***		***	1002		0.75
1985-10-08		***	26.3	***	13.2	***	18.5		18.7		18.2		18.3		19.1		19.5		8.2		7.9		6.8		0			***	200.23		73			***		***		***		***	1006.4		1.1
1985-10-09		***	24.8	***	11.1	***	18.2		18.3		17.6		17.7		19		19.4		9.9		9.7		9		0			***	197.915		76			***		***		***		***	1017.3		0.78
1985-10-10	20.1	***	24.7	***	14.6	***	19.3		19.3		18.4		18		18.8		19.3		12.9		12.6		11.8		0			***	124.999		50			***	385.022			***		***	1022		0.69
1985-10-11		***	21	***	19.4	***	18.9		18.6		18.9		18.4		18.8		19.3		15.9		15.8		15.1		11.5			***	26.6202		10			***		***		***		***	1021.3		0.83
1985-10-12		***	27.5	***	20.1	***	21.8		21.5		20		19		18.8		19.2		17.7		17.3		16.6		0.5			***	107.638		49			***		***		***		***	1016.7		0.96
1985-10-13		***	30.8	***	22.5	***	25.3		24.9		21.1		19.8		18.9		19.1		17.4		17		16.2		0			***	170.138		65			***		***		***		***	1005		2.74
1985-10-14		***	23	***		***	15.8		16.1		18.8		19.3		19.1		19.1		11.6		11.6		10.2		26			***	32.4072		-3			***		***		***		***	1008.7		0.88
1985-10-15	12.9	***	19.9	***	7.5	***	12.8		13.3		15.7		16.8		19.1		19.1		5.2		5.2		4.2		0			***	162.036		48			***	327.698			***		***	1019.9		0.7
1985-10-16		***	19.4	***		***	14.2		14.2		15.4		16		18.7		19		8		7.7		6.7		0			***	158.564		55			***		***		***		***	1014.1		0.59
1985-10-17	14.9		18.1		11.6		15.2		15		16.8		16.7		18.3		19		10.8		10.8		10.1		2.5			***	34.722		15			***	381.827			***		***	1005.4		0.83
1985-10-18	11.3		13.8		7.5		12.1		12.3		15.3		16		18.1		18.9		3.5		3.8		3.6		0.5			***	50.9256		8			***	355.116			***		***	1011.1		0.45
1985-10-19	11.3		18.1		5.8		12.7		13.2		14.1		15		17.8		18.8		4.8		4.7		3.8		0			***	160.879		53			***	318.504			***		***	1014.4		0.51
1985-10-20	12.2		15.9		7		12.6		12.6		14.1		14.6		17.5		18.7		6.1		5.9		4.8		0			***	62.4996		21			***	356.142			***		***	1019		0.95
1985-10-21	13.3		18.5		9.1		14.3		14.4		14.7		14.9		17.1		18.6		4.1		4		3.4		0			***	143.518		44			***	331.593			***		***	1022.1		0.63
1985-10-22	12.3		18.6		8		13.8		14.3		14.1		14.6		16.9		18.4		7.2		6.9		5.4		0			***	77.5458		16			***	351.516			***		***	1015.1		0.39
1985-10-23	13.4		21.1		5.8		14.3		14.6		13.7		14.1		16.7		18.3		5.9		5.6		4.5		0			***	165.508		47			***	326.158			***		***	1012.4		0.72
1985-10-24	13.9		22.4		7.5		15.2		15.2		14.4		14.4		16.5		18.2		5.7		5.6		5.3		0			***	155.092		42			***	330.964			***		***	1009.5		0.7
1985-10-25	10.4		17.6		5.1		12.3		12.7		13.4		14.1		16.3		18		0.6		0.8		0.7		0			***	173.61		47			***	302.489			***		***	1016.9		0.57
1985-10-26	10		13.9		3.6		10.4		10.5		12.6		13.3		16.1		17.9		2.8		2.8		2.3		0			***	83.3328		25			***	334.493			***		***	1021.3		0.51
1985-10-27	12.3		21.1		6.3		13.8		14.1		13.4		13.6		15.8		17.8		3.8		3.9		3.5		0			***	162.036		39			***	317.692			***		***	1017.4		0.67
1985-10-28	10.9		17.5		3.3		12.1		12.6		12.4		13.1		15.7		17.6		2.4		2.3		1.7		0			***	155.092		36			***	311.681			***		***	1022.1		0.5
1985-10-29	10.8		13.5		6.4		11		10.9		12.6		12.9		15.4		17.5		6.9		6.8		6.1		5			***	41.6664		10			***	355.617			***		***	1020.9		0.62
1985-10-30	14.2		16.6		12.1		14.5		14.2		14.1		13.6		15.3		17.4		11.8		11.5		10.7		3.5			***	37.0368		17			***	376.226			***		***	1013.1		0.5
1985-10-31	16.7		21		13.9		17		16.6		15.1		14.5		15.2		17.3		9.7		9.5		8.7		0			***	128.471		46			***	355.335			***		***	1011.1		1.53
1985-11-01	13.9		15.5		10.3		14.3		14.2		14.8		14.5		15.4		17.1		11.2		10.9		10.1		4			***	19.6758		1			***	380.666			***		***	1005.9		0.45
1985-11-02	11.3		18.4		2.6		12.4		12.7		13.9		14.3		15.4		17		2.6		2.6		1.9		0			***	150.462		35			***	312.574			***		***	1009.2		0.99
1985-11-03	7.3		16		-0.7		9.6		10.6		11		12.5		15.4		16.9		-1.4		-1.2		-2		0			***	158.564		29			***	287.737			***		***	1025		0.66
1985-11-04	9.2		18.9		0.8		10.8		11.5		10.7		11.6		15		16.8		3.2		3		1.4		0			***	144.675		36			***	305.552			***		***	1026.6		0.84
1985-11-05	13.1		19.8		7.1		13.7		13.7		12.2		12		14.6		16.8		6.6		6.6		6		2.5			***	107.638		40			***	339.944			***		***	1023.4		0.55
1985-11-06	14.7		16.2		13.2		15		14.7		14		13.3		14.4		16.6		12.2		12.1		11.1		19.5			***	25.4628		9			***	382.529			***		***	1021		0.82
1985-11-07	16.2		18.2		14.3		16.6		16.4		15		14.1		14.4		16.4		13.9		13.7		12.6		15			***	31.2498		12			***	388.694			***		***	1011.2		0.74
1985-11-08	16.8		21.3		13.3		17.4		17.2		15.6		14.7		14.6		16.2		13.1		12.6		11.7		0.5			***	104.166		45			***	365.25			***		***	1003.5		0.64
1985-11-09	16.6		22		11.3		17		17		15.6		14.9		14.8		16.2		10.9		10.4		9.4		0			***	138.888		45			***	349.198			***		***	1004.3		0.9
1985-11-10	15.5		18.3		13		15.8		15.5		15.5		15		15		16.1		11.3		11.1		10		1			***	78.7032		26			***	365.129			***		***	1001.1		1.23
1985-11-11	11.8		17.2		5.8		12.9		13.1		14.2		14.5		15.1		16.1		7.6		7.3		6.1		0			***	94.9068		16			***	337.132			***		***	1002.9		0.5
1985-11-12	10		18.8		3		11.8		12.7		12.2		13		15.1		16.1		2		2		0.6		0			***	129.629		22			***	309.007			***		***	1002.5		0.83
1985-11-13	7.5		16.3		0.2		9.6		10.3		10.5		11.8		14.8		16.1		-1.6		-1.3		-2.3		0			***	129.629		17			***	294.012			***		***	1003.5		0.78
1985-11-14	6.9		16		0.4		9.4		10.2		9.7		10.9		14.3		16.1		-1.7		-1.6		-2.7		0			***	138.888		19			***	287.175			***		***	1005.8		0.89
1985-11-15	7.1		15.1		0.2		9.1		9.6		9.1		10.2		13.9		16		-1.5		-1.5		-2.3		0			***	135.416		19			***	289.183			***		***	1009.5		0.97
1985-11-16	4.5		11.9		-1.3		6.6		7.9		8.2		9.5		13.4		15.9		-0.3		-0.2		-1.7		0			***	70.6014		4			***	306.542			***		***	1014		0.61
1985-11-17	5.3		16.7		-1.4		7.4		8.5		7.9		9		13		15.8		1.3		0.9		-0.6		0			***	81.018		4			***	306.079			***		***	1005.3		0.86
1985-11-18	8.1		16.9		-0.6		9.6		10.3		8.3		8.9		12.6		15.7		0.1		-0.2		-1.4		0			***	130.786		25			***	295.426			***		***	1003.3		1.01
1985-11-19	7.4		13.7		-0.5		8		8.6		8.6		9.2		12.3		15.5		-1.3		-1.6		-2.7		0			***	136.573		17			***	288.164			***		***	1009.4		1.04
1985-11-20	8.4		12.3		4.1		8.6		8.6		9.5		9.6		12.2		15.3		2.4		2.4		1.6		0			***	57.87		9			***	330.658			***		***	1014.1		0.86
1985-11-21	7.5		16.6		1.6		8.9		9.7		9.1		9.7		12.1		15.2		2.1		1.7		0.3		0			***	122.684		9			***	297.37			***		***	1017.1		0.99
1985-11-22	8.5		16		1.8		9.5		10.3		9.2		9.4		12.1		15		4		3.6		2.4		0			***	75.231		8			***	323.579			***		***	1014.5		0.75
1985-11-23	13		22.1		7.5		14.2		14.6		11.2		10.6		12		14.9		7.8		7.7		6.5		0			***	101.851		17			***	336.114			***		***	1004.6		0.72
1985-11-24	8.2		11.6		5.2		8.6		8.9		10.2		10.6		12.1		14.8		4.8		5.1		4.1		16.5			***	15.0462		2			***	351.058			***		***	1004.3		1.22
1985-11-25	6.3		12.1		-0.5		6.6		6.7		9.3		10.1		12.1		14.7		-1.7		-1.4		-2.3		0			***	123.842		8			***	285.857			***		***	1007		1.39
1985-11-26	5		12.9		-2.5		6.6		7		7.5		8.8		12		14.5		-3.6		-3.4		-4.2		0			***	122.684		9			***	278.888			***		***	1014.9		0.95
1985-11-27	5.1		13.3		-2.7		6.4		7		7		8.3		11.7		14.4		-1.9		-2		-3.1		0			***	124.999		8			***	279.627			***		***	1020		0.95
1985-11-28	6.7			***	1.7		7		7.3		8		8.3		11.4		14.3		2.6		2.7		1.7		0.5			***	27.7776		1			***	336.357			***		***	1010.1		0.86
1985-11-29	6.5		11.3		2.1		7.1		7.3		8		8.6		11.3		14.2		0.1		0.3		-0.9		0.5			***	37.0368		2			***	329.597			***		***	1009.9		1.6
1985-11-30	4.1		9.6		0.2		5		5.5		7.3		8.2		11.2		14.1		-0.4		-0.1		-1.6		1			***	92.592		11			***	290.439			***		***	1017.1		1.01
1985-12-01	3.2		11.2		-1.8		4.7		5.6		6		7.4		11		14		-1.2		-1.2		-3.1		0			***	111.11		2			***	277.237			***		***	1015.4		0.98
1985-12-02	6.1		14.8		-1.7		7.8		9.2		5.7		6.9		10.8		13.8		-1.7		-1.3		-2.8		0			***	104.166		0			***	291.479			***		***	1013.1		1
1985-12-03	7.1		12.6		0.8		8		8.4		6.3		7		10.5		13.7		-0.6		-0.6		-1.8		0			***	113.425		9			***	292.133			***		***	1021.4		1.15
1985-12-04	6.7		12.6		1.7		7.5		8		7.4		7.7		10.4		13.6		1.7		1.5		0.2		0			***	97.2216		6			***	299.957			***		***	1015.8		0.9
1985-12-05	8.2		14.2		0.4		9.1		9.6		7.6		7.9		10.3		13.5		1.8		1.6		0.1		0			***	108.796		12			***	300.779			***		***	1015.5		1.21
1985-12-06	7.9		11.7		3.3		8.2		8.6		7.9		8.1		10.3		13.3		2.1		2		0.9		0			***	45.1386		-10			***	331.551			***		***	1016.6		1.45
1985-12-07	7.2		8.5		5.7		7.2		7.1		8.3		8.4		10.3		13.2		2.5		2.8		1.7		7.5			***	23.148		7			***	340.478			***		***	1017.8		1.4
1985-12-08	7.3		9.7		5.3		7.3		7.2		8.9		8.6		10.3		13.1		4.5		4.6		3.4		6			***	37.0368		30	*		***	333.778			***		***	1008.3		0.82
1985-12-09	6		11.4		0.4		5.9		5.9		8.3		8.6		10.4		13		-0.9		-0.7		-1.9		0			***	97.2216		52	***		***	292.915			***		***	999.8		1.52
1985-12-10	2.2		6.7		-0.9		2.5		2.7		5.7		7.4		10.4		12.9		-7.6		-7.1		-8		0			***	114.583		1	*		***	263.171			***		***	1008.3		1.39
1985-12-11	1.2		6.5		-2.6		1.5		1.9		4.2		5.9		10.2		12.8		-6.1		-6		-7.1		0			***	54.3978		-10			***	291.943			***		***	1011.3		1.05
1985-12-12	1.4		8.4		-3.4		2.4		2.9		3.8		5.3		9.8		12.8		-4.1		-4.2		-5.6		0			***	106.481		-3			***	266.304			***		***	1008.7		1.04
1985-12-13	1.1		8.9		-4.5		2.4		3.1		3.4		5		9.4		12.7		-3.9		-4		-5.7		0			***	107.638		-4			***	264.564			***		***	1010.7		1.13
1985-12-14	2.3		12.5		-4.3		5.1		5.9		3.4		4.8		9.1		12.6		-4.3		-4.2		-5.6		0			***	90.2772		-5			***	277.342			***		***	1003		1.22
1985-12-15	1.1		7		-2.8		2.9		3.5		3.1		4.6		8.8		12.4		-5.3		-5.4		-6.4		0			***	109.953		0			***	261.654			***		***	998.7		1.02
1985-12-16	-1		5.2		-6.7		0.3		1		2.2		4.1		8.5		12.3		-9		-8.9		-10		0			***	113.425		-6			***	249.275			***		***	1003.5		0.97
1985-12-17	-0.6		6.2		-6.3		-0.3		0.1		1.8		3.6		8.3		12.1		-9.1		-9		-10		0			***	105.323		-10			***	254.566			***		***	1002.1		0.99
1985-12-18	-0.2		7.1		-5.9		1.5		2.3		1.6		3.3		8		12		-9.7		-9.6		-10.5		0			***	112.268		-3			***	252.101			***		***	1014		1.33
1985-12-19	0.3		9.7		-5.5		2		3.1		1.5		3.1		7.7		11.8		-7.8		-7.8		-8.6		0			***	108.796		-3			***	256.881			***		***	1012.4		1.05
1985-12-20	2		8.4		-5.2		2.7		3.1		1.7		3.1		7.4		11.7		-7.9		-8.1		-9.2		0			***	111.11		-11			***	261.998			***		***	1017.8		0.55
1985-12-21	0.1		7.6		-5.7		1.9		2.7		1.5		3		7.2		11.5		-8.1		-8.3		-9.3		0			***	108.796		-3			***	255.862			***		***	1026.6		0.8324	***
1985-12-22	1		4.4		-4.8		1		1.2		2.1		2.9		7		11.3		-4		-4.4		-5.2		3.5			***	24.3054		7			***	308.734			***		***	1023.2		0.6304	***
1985-12-23	5.5		10.3		-0.4		5.6		5.6		4.8		4.2		6.9		11.2		1.7		1.5		0.6		0			***	68.2866		15			***	305.937			***		***	1008.7		0.6304	***
1985-12-24		***	6.8			***	3.8		4.1		4.3		4.8		7		11		-7.4		-7.2		-8.1		0			***	112.268		-8			***		***		***		***	1013.6		1.6404	***
1985-12-25	0		7.7		-5.2		1.6		2.8		2.3		3.7		7.1		10.9		-6.7		-6.2		-7.5		0			***	81.018		-3			***	270.544			***		***	1016.7		0.59	***
1985-12-26	3.7		9.3		-2.7		4.5		4.9		2.6		3.5		7		10.8		-5.1		-5		-6.1		0			***	106.481		4			***	272.69			***		***	1016.2		0.7516	***
1985-12-27	3.7		11.7		-3.4		4.4		4.8		3.9		4.2		6.9		10.7		-6.1		-6		-6.9		0			***	107.638		0			***	271.256			***		***	1013.7		1.2768	***
1985-12-28	-0.1		7.6		-4.9		2.4		3.6		2		3.5		6.9		10.6		-8.1		-8.1		-9		0			***	108.796		-4			***	254.766			***		***	1022.6		0.5092	***
1985-12-29	1.1		9.5		-5.4		1.9		2.9		1.9		3.1		6.8		10.5		-4.7		-4.9		-6		0			***	98.379		3			***	267.1			***		***	1020.7		0.5496	***
1985-12-30	7.1		14.5		-1.7		7.5		8		4.1		3.8		6.6		10.4		1		0.8		-0.3		0			***	79.8606		8			***	306.235			***		***	1009.6		0.8324	***
1985-12-31	8.6		15.8		4.2		9.1		9.5		6.1		5.4		6.6		10.3		-0.5		-0.5		-1.4		0			***	78.7032		8			***	312.138			***		***	1000.4		0.8728	***
1986-01-01	5.3		8.1		2.9		5.8		6.1		6.2		5.8		6.8		10.2		0.6		0.9		0		1.5			***	35.8794		4			***	322.55		0.0019	***		***	1006.1		0.388	***
1986-01-02	3.7		9.9		-2.3		4.2		4.6		4.8		5.3		7.1		10.1		-8.1		-7.6		-8.9		0			***	96.0642		-2			***	276.35		0.0081	***		***	1010.6		1.0748	***
1986-01-03	-0.5		4.9		-7.2		0.3		1.1		2.7		4.1		7.1		10.1		-8.5		-8.3		-9.9		0			***	56.7126		-8			***	281.677		0.0035	***		***	1022.8		0.5496	***
1986-01-04	1.9		8.1		-1.6		2.1		2.5		3.7		4.1		7		10		-2.6		-2.6		-4.4		12.5			***	53.2404		4			***	296.19		0.0124	***		***	1006.8		0.7516	***
1986-01-05	1.9		6.1		-3.1		2.1		2.4		3.6		4.1		6.8		10		-7.6		-7.1		-8.7		0			***	79.8606		-3			***	278.642		0.0093	***		***	996.2		1.4384	***
1986-01-06	-0.8		5.9		-8		0.6		1.2		1.2		3		6.7		10		-13.2		-12.7		-13.9		0			***	120.37		-12			***	243.556		0.0068	***		***	1004.8		1.2364	***
1986-01-07	-1.5		5.5		-6.6		0.7		1.8		0.8		2.4		6.5		9.9		-10.2		-9.9		-11.1		0			***	93.7494		-7			***	256.811		0.0089	***		***	1011.7		0.59	***
1986-01-08	-0.4		8.7		-7.1		1.2		2.2		0.7		2.1		6.2		9.8		-6.7		-6.7		-8.5		0			***	105.323		0			***	257.383		0.0079	***		***	1008.1		0.59	***
1986-01-09	2.4		7.2		-3		2.9		3.3		1		2.2		6		9.7		-11.8		-11.6		-12.9		0			***	122.684		-14			***	255.716		0.008	***		***	1010.4		1.6	***
1986-01-10	-1.6		6.6		-7.6		0.6		1.4		0.6		1.9		5.8		9.6		-10.8		-10.9		-12		0			***	115.74		-4			***	245.552		0.0112	***		***	1014.7		0.8324	***
1986-01-11	-2.9		5.2		-9.1		-1.3		0		0.2		1.6		5.6		9.5		-9.6		-9.6		-11.4		0			***	122.684		-1			***	238.681		0.0126	***		***	1017.1		0.59	***
1986-01-12	-2		6.9		-9.7		-0.3		1		0.1		1.4		5.4		9.4		-10		-10.1		-11.7		0			***	124.999		1			***	240.807		0.01	***		***	1019.6		1.0344	***
1986-01-13	-1.9		3.5		-7.9		-0.9		0		0.1		1.2		5.2		9.3		-8		-8.3		-9.6		0			***	67.1292		-7			***	271.539		0.0064	***		***	1010.6		0.6708	***
1986-01-14	2.1		6.2		-2		2.3		2.5		0.1		1.2		5.1		9.2		-11.7		-11.8		-12.9		0			***	122.684		-10			***	256.104		0.0127	***		***	1007.7		2.4484	***
1986-01-15	2.7		9.8		-4.2		4.1		4.5		0.2		1.3		5		9.1		-9.3		-9.4		-10.4		0			***	121.527		1			***	261.074		0.0087	***		***	1012.7		1.5596	***
1986-01-16	1.1		5.7		-4.8		1.9		2.1		0.3		1.4		4.8		8.9		-4.4		-4.6		-5.5		0			***	37.0368		7			***	302.55		0.0003	***		***	1014.2		0.7516	***
1986-01-17	2.9		10.4		-2.7		4.2		4.6		2.3		2.2		4.7		8.8		-2		-2.7		-4.2		0			***	119.212		12			***	269.91		0.0087	***		***	1010.3		0.7516	***
1986-01-18	0.5		9.6		-5.3		2.8		3.6		1.8		2.4		4.8		8.7		-4.6		-5.1		-6.7		0			***	84.4902		-4			***	275.037		0.0056	***		***	1013.7		0.4688	***
1986-01-19	-0.6		6.7		-7.9		1.5		2.3		0.9		2		4.8		8.6		-6.8		-7.1		-8.4		0			***	124.999		7			***	250.491		0.0063	***		***	1017.9		0.7516	***
1986-01-20	-0.4		4.8		-3.9		0.7		1.6		1.3		1.9		4.8		8.5		-4.6		-5.2		-6.3		0			***	41.6664		3			***	293.924		0.0042	***		***	1014		0.4688	***
1986-01-21	0.7		6.7		-4.7		1.9		2.5		1.7		2.1		4.7		8.4		-5.2		-5.7		-7		0			***	92.592		8			***	272.279		0.0063	***		***	1009.2			***
1986-01-22	0.3		5.7		-4.7		0.8		1.1		2.4		2.6		4.7		8.4		-8.9		-9		-9.8		0			***	129.629		16			***	251.062		0.0067	***		***	1001.2		0.71	***
1986-01-23	-0.6		5.8		-7.3		0.5		0.9		1		2.1		4.8		8.3		-10.7		-10.9		-11.7		0			***	131.944		5			***	245.896		0.0084			***	1003.7		1.11	***
1986-01-24	-1.4		6.4		-7.8		-0.1		0.6		1		1.9		4.7		8.3		-10.6		-10.9		-11.9		0			***	129.629		9			***	244.646		0.0137			***	1010.5		0.73
1986-01-25	-1.2		6.5		-9		0		0.5		0.4		1.6		4.7		8.2		-10.9		-11.1		-12		0			***	126.157		12			***	247.176		0.0104			***	1011.2		0.97
1986-01-26	-1.3		5.6		-7.9		-0.4		0.4		0.5		1.5		4.6		8.1		-11.7		-11.8		-12.7		0			***	130.786		8			***	244.636		0.0103			***	1010.1		0.89
1986-01-27	-1.3		6.1		-9		-0.9		-0.3		0.3		1.4		4.5		8.1		-12.3		-12.5		-13.4		0			***	137.731		2			***	241.616		-0.0018	***		***	1009.8		0.68
1986-01-28	0.5		7		-6.9		1.2		1.5		0.4		1.3		4.4		8		-9.9		-10.2		-11.2		0			***	124.999		1			***	255.978		0.0081	*		***	1011.4		1.14	***
1986-01-29	0		7.7		-6.6		1.4		2.2		0.6		1.4		4.3		7.9		-8.6		-8.9		-10.1		0			***	133.101		11			***	251.987		0.0114			***	1017.4		0.73	*
1986-01-30	-0.8		5.1		-6.1		0		0.6		0.6		1.4		4.2		7.9		-4.4		-4.9		-6.5		0			***	52.083		2			***	288.747		0.0044			***	1013.7		0.71
1986-01-31	1.7		8.4		-7.9		2.6		3.1		1.6		1.6		4.2		7.8		-3.8		-4.3		-5.7		0			***	86.805		12			***	283.258		0.0036			***	1008.4		1.07
1986-02-01	1.3		4.5		-1.6		1.5		1.6		2.3		2.3		4.2		7.7		-3.7		-4.1		-5		2			***	92.592		18			***	279.455		0.0015			***	1013.2		0.99
1986-02-02	1.8		8		-3		2.4		2.7		2.7		2.6		4.3		7.7		-4.8		-5.3		-6.5		0			***	135.416		22			***	262.568		0.0126			***	1012.3		0.74
1986-02-03	2.3		12.5		-4.5		2.6		3		2.6		2.8		4.4		7.6		-5.8		-6.2		-8		0			***	137.731		12			***	263.098		0.0091			***	1006.7		1.33
1986-02-04	0.7		6.1		-4.8		1.1		1.4		2.5		3		4.5		7.6		-9.8		-10.1		-11.6		0			***	149.305		10			***	249.815		0.0108			***	1011.7		0.97
1986-02-05	-0.3		8.4		-6.9		0.7		1.1		1.9		2.7		4.6		7.6		-10.2		-10.4		-11.8		0			***	152.777		14			***	245.037		0.0147			***	1012.1		1.1
1986-02-06	-1.5		6.1		-7.3		-0.4		0.4		1.3		2.3		4.6		7.5		-12.6		-12.5		-13.6		0			***	158.564		16			***	237.322		0.0178			***	1013.2		0.69
1986-02-07	-0.8		5.5		-8.9		-0.2		0.4		1		2.1		4.6		7.5		-10.8		-11		-12.2		0			***	156.249		20			***	242.557		0.0136			***	1013.7		0.85
1986-02-08	-1.4		2.4		-5.4		-0.3		0.2		1.9		2.3		4.5		7.5		-5.7		-6.3		-7.9		0			***	76.3884		11			***	276.863		0.0051			***	1014.2		0.81
1986-02-09	-0.7		7.3		-7.4		0.4		1.1		0.9		2		4.5		7.5		-9.9		-10		-11.9		0			***	160.879		13			***	242.913		0.0154			***	1013.7		1.01
1986-02-10	-0.2		5.8		-4.5		0.5		0.9		0.9		1.8		4.4		7.5		-10.5		-10.8		-12.2		0			***	162.036		15			***	244.429		0.0115			***	1017.5		1.02
1986-02-11	-0.6		3		-6.7		-0.5		-0.3		0.8		1.6		4.4		7.5		-8.2		-8.6		-10		0			***	45.1386		4			***	294.439		0.0019			***	1013.2		1.38
1986-02-12	1		7.5		-6.8		2.4		2.8		1.8		2		4.3		7.4		-9.5		-9.9		-11.1		0.5			***	168.98		21			***	247.987		0.0164			***	1012.7		0.77
1986-02-13	1.6		10.2		-7		3.3		4.2		1.8		2.2		4.3		7.4		-6.6	***	-6.2	***		***	0	*		***	146.99		23			***	261.383		0.0162			***	1013		0.55
1986-02-14	4.7		12.4		-3.6		5		5.7		3.4		2.8		4.3		7.3		-2.7		-2.5	*	-2.6		9			***	121.527		18			***	287.214		0.0096			***	1007.6		1.4
1986-02-15	5.1		6.5		1.6		5.2		5.1		4.6		3.9		4.4		7.3		-1.6		-0.3		-1.3		1			***	20.8332		1			***	333.718		0.0005			***	1003		1.52
1986-02-16	0.1		4.5		-6.8		0.6		1		2.7		3.4		4.7		7.3		-13.1		-11.3		-12.8		0			***	144.675		16			***	253.819		0.0136			***	1010.3		1.47
1986-02-17	-1		8.7		-10.6		0.1		0.8		1.1		2.4		4.8		7.3		-12.4		-10.7		-12.5		0			***	182.869		27			***	236.718		0.0185			***	1019.8		0.75
1986-02-18	-1.2		3.1		-6.7		-0.6		0		1.1		2		4.7		7.3		-6.6		-4.6		-6.5		0			***	41.6664		6			***	295.061		0.0231	***		***	1017.2		1.18
1986-02-19	0.8		4.2		-1.7		1.1		1.4		1.9		2.1		4.6		7.3		-2.8		-1		-3		13.5			***	84.4902		-7			***	287.361		0.0031	***		***	1004.4		1.46
1986-02-20	-0.7		5.7		-6.5		0.1		0.9		1.9		2.1		4.5		7.3		-6.9		-3.7	***	-6.9		1			***	158.564			***		***	251.944		0.0003			***	1010.3		0.62
1986-02-21	0.7		7.3		-7.1		1.8		2.5		1.8		2		4.4		7.2		-8.9		-1	***	-7.9		0			***	192.128		7			***	244.545		0.002			***	1008.8		0.74
1986-02-22	1.4		5.9		-3.4		1.6		1.8		1.9		2.1		4.3		7.2		-7.3		-0.1	***	-6.4		0			***	157.406		33			***	260.977		-0.0003			***	1010.5		1.22
1986-02-23	3.3		9		-0.8		3.9		4.2		3.8		3.1		4.3		7.2		-4.2		3	***	-3.6		0			***	177.082		40			***	264.553		0.0176			***	1007.1		0.84
1986-02-24	1.9		8.5		-2.9		2.4		2.8		3.7		3.6		4.4		7.1		-8.4		-2.1	***	-7.6		0			***	173.61		44			***	257.371		0.0158			***	1005.7		1.05
1986-02-25	0.7		5.5		-5.6		1.2		1.4		2.8		3.4		4.6		7.1		-12.6		-9	***	-11.4		0			***	195.601		30			***	242.921		0.0182			***	1009.4		1.71
1986-02-26	1.7		8.4		-3		2.4		2.7		2.7		3.1		4.7		7.1		-11.8		-10.6		-10.6		0			***	187.499		32			***	250.527		0.015			***	1012.6		1.31
1986-02-27	2		8		-4.6		2.4		2.7		2.7		3		4.7		7.1		-5.9		-5		-4.9		0			***	113.425		22			***	282.483		0.0058			***	1009.6		1.57
1986-02-28	1.4		5.2		-3.9		1.9		2		3.4		3.3		4.7		7.1		-6.5		-5.3		-4.9		2			***	78.7032		2			***	293.191		0.0129	***		***	1001.5		1.28
1986-03-01	2.8		10		-4.4		3.7		4		3.2		3.3		4.7		7.1		-8.8		-7.8		-7.1		0			***	189.814		46			***	257.825		0.0172			***	1009		1.02
1986-03-02	1.8		8.6		-3.7		2.6		3		3.7		3.8		4.7		7.1		-7.1		-6.3		-6		0			***	179.397		37			***	259.334		0.0196			***	1005		0.76
1986-03-03	2.4		10.6		-4.9		3.5		3.8		3.3		3.7		4.9		7.1		-10.8		-10.3		-9.2		0			***	193.286		39			***	254.725		0.0194			***	1004.4		1.99
1986-03-04	1		6		-6.1		1.2		1.3		3		3.5		4.9		7.1		-9.5		-10.1		-7.9		0			***	203.702		51			***	247.999		0.0144			***	1015.6		1.41
1986-03-05	1.9		7.3		-0.4		2.1		2.2		4.3		4		4.9		7.1		-2.2		-2.9		-0.7		4.5			***	111.11		26			***	287.3		-0.0052	***		***	1010.2		0.86
1986-03-06	2.2		6.1		-2		2.5		2.7		3.9		4		5		7.1		-4.2		-4.6		-1.7		0.5			***	156.249		45			***	272.786		0.004			***	1020.8		1.58
1986-03-07	4.4		10.9		1		5		5.2		5.3		4.6		5.1		7.1		-2.4		-3.3		-0.9		0			***	148.147		40			***	286.262		0.016			***	1023		0.67
1986-03-08	5.3		12		-3.8		5.8		5.9		5.5		5.1		5.3		7.1		-2.9		-3.6		-1		0			***	201.388		43			***	273.396		0.0108			***	1024.1		1.4
1986-03-09	8.8		17.3		-1		9.6		9.7		7.3		6.1		5.5		7.1		0.7		-0.1		1.9		0			***	190.971		48			***	295.39		0.016			***	1021.3		1.08
1986-03-10	9.3		16.5		3.3		10.3		10.6		7.5		6.6		5.8		7.2		5.1		4		5.3		0			***	60.1848		12			***	343.215		0.0022			***	1012.3		1.24
1986-03-11	5.3		8.5		1.5		5.6		5.7		6.4		6.3		6.1		7.2		1.5		0.8		2.6		11			***	24.3054		5			***	335.632		-0.0032			***	1008.1		1.86
1986-03-12	5.3		12.2		-0.5		6		6		6.7		6.1		6.3		7.3		-1.1		-1.9		-0.4		1			***	158.564		39			***	289.759		0.0208	*		***	1009		0.93
1986-03-13	6.1		14.2		-2.8		7.2		7.6		6.7		6.3		6.3		7.3		-3		-3.5		-2.3		0			***	201.388		51			***	278.849		0.0161			***	1014.8		1.16
1986-03-14	4.2		6.1		0.7		4.1		4		6.1		6.3		6.5		7.4		-0.7		-1.1		0		7.5			***	52.083		21			***	320.528		0.0425	***		***	1018.5		2.4
1986-03-15	3.4		5.4		0.4		3.3		3.2		5		5.2		6.5		7.4		-0.2		-0.7		0		10			***	38.1942		23			***	321.846		0.0284	***		***	1011.7		1.71
1986-03-16	9		16.4		3.8		9		8.7		8.8		6.8		6.4		7.4		3.7		9.4	***	4.3		2			***	163.193		71			***	310.421		0.0174			***	999.6		1.13
1986-03-17	5.5		10.3		-1.3		5.8		5.9		7.6		7.6		6.6		7.5		-8.3		-3.5	***	-6.5		0			***	226.85		67			***	265.813		0.0193			***	1004.8		2.03
1986-03-18	4.2		9.8		-4.1		5.2		5.5		6.4		6.4		6.8		7.5		-6.9		-6.8		-5.8		0			***	162.036		42			***	282.02		0.0163			***	1009.6		0.93
1986-03-19	7.1		8.9		5		7.1		7		7.9		7		6.9		7.6		3.8		3.7		3.9		55.5			***	30.0924		16			***	343.265		0.0274	***		***	1000.7		1.03
1986-03-20	8		12.2		3.9		8.1		8.1		8.3		7.8		7		7.2		-3.1		-2.9		-3.1		1.5			***	173.61		65			***	297.778		0.0561	***		***	994.5		2.49
1986-03-21	5.8		11.7		1.1		6.2		6.3		7.1		7		7.2		7.3		-5.9		-5.9		-6.2		0			***	217.591		59			***	273.889		0.0203			***	1009.7		1.07
1986-03-22	4.4		7		2.3		4.4		4.4		6.3		6.7		7.2		7.4		-2.4		-2.4		-2.9		1.5			***	43.9812		13			***	324.906		0.0001			***	1015.3		1.6
1986-03-23	2	***	3.8	***	0	***	2	***	2	***	3.6	***	4.6	***	6	***	6.2	***	-2.3	***	-2.3	***	-5.5	***	36	*		***	17.361	***	9	***		***		***	-0.0001	***		***		***	3.67
1986-03-24	5.9		10.1		-0.8		6.3		6.4		5.5		5.2		6.8		7.1		-5.3		-5		-7.1		3.5			***	156.249		66			***	294.076		0.0085			***	999.7		1.12	***
1986-03-25		***	10.6	***		***	3.5	***	3.9		6		5.9		6.6		7.1		-7.9		-7.3		-8.7		0			***	230.323		69			***		***	0.0038	***		***	1014		0.59
1986-03-26		***		***		***		***		***	5.6	***	5.2	***	5.6	***	6.1	***	-4.3		-4.2		-3.5		0			***	240.739		72			***		***	0.0186			***	1020.1		1	***
1986-03-27		***		***		***		***			7.9		7		6.6		7.3		-2.4		-2.6		-2		0			***	233.795		70			***		***	0.004	***		***	1018.5		0.32
1986-03-28		***		***	0	***	1.2	***	1.2		6.7		7		6.8		7.4		0		-1.3		1		11.5			***	42.8238		15			***		***	-0.0025	*		***	1014.8		1.4384	***
1986-03-29	5.8		9.5		2.6		5.9		5.8	***	9.7	***	5.8	***	6.1	***	6.5	***	0.7		0.5		1.9		2			***	87.9624		33			***	319.396		0.0054			***	1007.2		1.2	*
1986-03-30	5.9		10.4		-0.5		6.1		6.3		7.2		6.6		7		7.5		2.6		2.3		3.4		0.5			***	75.231		34			***	324.59		0.0065			***	1008.4		0.81
1986-03-31	9		15.4		1.7		9.4		9.4		9.5		8.3		7.1		7.6		-1.1	***	-0.9	***		***	0			***	141.203		47			***	317.523		0.0139			***	1004.4		0.98
1986-04-01	6.5		12.8		-1.9		7.4		7.8		8		7.7		7.4		7.7		-4.7	***	-4.3	***		***	0			***	211.804		70			***	284.213		0.0129			***	1014.1		1.13
1986-04-02	12.5	***	18	***	3.9	***	12.8	***	12.7		10.7		9.1		7.5		7.8		-1.4	***	-1.4	***		***	0			***	237.267		76			***	306.467		0.0182			***	1015.2		1.39
1986-04-03	7.8	*	10.8	*	4.5	*	7.7	*	7.5		9.4		9.1		7.8		7.9		0.2	***	0.1	***		***	0			***	157.406		56			***	309.675		0.0095			***	1020.8		1.94
1986-04-04	9.2	*	11.3	*	6.9	*	9.3	*	9.2		9.9		9.1		8.1		8			***		***		***	8			***	30.0924		14			***		***	-0.0027	*		***	1010.1		0.74
1986-04-05	12.4		19.7		8.7		12.3		12.1		11.7		10.4		8.3		8.1		-1	***	-4.5	***	-10.8	***	0			***	203.702		78			***	316.566		0.0167			***	1002.3		1.65
1986-04-06		***	15.9	***	0.3	***	5.6	***	4		10.2		9.9		8.6		8.2		-5.6	*	-6.2	*	-5.6	*	0			***	219.906		57			***		***	0.0136			***	1005.2		1.38
1986-04-07		***		***	-0.5	***	3.4	***	3.5		9.3		9.4		8.8		8.3		-6.1		-6.2		-6.6		0			***		***	59			***		***	0.0189			***	1010		1.99
1986-04-08	7.6	*	16	*	-2.4	*	8.4	*	8.7		9.2		8.8		8.8		8.4		-5.5		-6.1		-6.1		0			***	253.471		72			***	279.781		0.0173			***	1018.3		1.21
1986-04-09	12.9	*	22.1	*	2.8	*	13.4	*	13.8		11.6		10		8.7		8.5		1.8		0.9		0.9		0			***	239.582		78			***	314.47		0.0155			***	1015.1		1.33
1986-04-10		***		***	10.4	***	17.2	***	17.3		12.7		11.2		9		8.6		9.5		8.5		8.4		7			***	90.2772		33			***		***	-0.0044			***	1005.3		2.02
1986-04-11		***	13.7	***		***	8.4	***	8.4		11.8		11.2		9.4		8.8		7.1		6.2		6.3		5			***	41.6664		18			***		***	-0.0025			***	1000		1.36
1986-04-12	8.6	*	15.1	*	0.8	*	9.2	*	9.3		10.9		10.6		9.6		8.9		-6.6		-7.2		-6.2		0			***	277.776		86			***	278.017		0.015			***	1009.9		1.84
1986-04-13	9.6		17		0.6		10.2		10.5		11.1		10.5		9.7		9		-2.2		-3.2		-2.8		0			***	273.146		79			***	288.665		0.0223			***	1016.5		0.96
1986-04-14	9.2		16.4		2.4		9.9		10.1		10.5		10.5		9.8		9.1		-1.2		-1.9		-2.1		0			***	249.998		82			***	294.165		0.012			***	1020.2		1.82
1986-04-15	10.1		12.9		6.6		10.1		10		10.9		10.3		9.9		9.2		3.6		3		3.1		19			***	47.4534		16			***	354.949		-0.0105	*		***	1013.1		0.97
1986-04-16	12.4		17		6.5		12.4		12.2		13.4		11.9		10		9.3		-0.4		-0.9		-0.4		6			***	270.832		101			***	304.078		0.0168	*		***	1005.4		1.79
1986-04-17	8.4		12.2		5.7		8.4		8.2		10.8		10.9		10.2		9.4		-1.1		-1.9		-1.7		0			***	138.888		48			***	319.687		0.0114			***	1017.1		1.38
1986-04-18	11.3		16.6		4.8		11.6		11.7		11.8		11		10.3		9.5		4.9		4		4.1		0			***	107.638		29			***	345.518		0.0071			***	1016.6		0.84
1986-04-19	12.6		15.5		10.8		12.6		12.4		12.8		11.7		10.4		9.6		8.3		7.4		7.6		1			***	79.8606		32			***	360.908		-0.0006			***	1016.4		1.53
1986-04-20	13.9		16.6		12.3		13.8		13.6		13.9		12.4		10.6		9.7		8.2		7.2		7.4		0			***	131.944		56			***	354.92		0.0049			***	1015.8		2.04
1986-04-21	15.2		18.7		12.3		15.1		14.9		14.8		13.2		10.8		9.8		8.8		7.7		7.9		0			***	151.619		50			***	357.517		0.0083			***	1017.2		1.59
1986-04-22	13.6		16.8		12.4		13.7		13.5		14.2		13.3		11.2		9.9		9.5		9.1		8.8		6.5			***	79.8606		37			***	366.859		-0.0209	***		***	1017		2.2
1986-04-23	15		21.1		7.9		15.1		14.9		15.6		14.1		11.5		10.1		10		9.9		9.1		16			***	216.434		91			***	344.22		0.0123	***		***	1008.3		1.58
1986-04-24		***	17.4	*		***	11.2	*	12.2		14.8		14.2		11.8		10.2		5.3		5		3.9		0			***	263.887		90			***		***	0.0185			***	1014.4		1.41
1986-04-25		***	17.7	***	10.8	***	13.9	***	14		16		14.6		12.1		10.3		8.5		8.1		7.6		0			***	138.888		45			***		***	0.0115			***	1013.1		0.99
1986-04-26		***		***		***	13.3	***	13.5		16.1		14.9		12.4		10.5		9.8		9.6		8.5		0			***	203.702		73			***		***	0.0127			***	1012.2		2.03
1986-04-27		***		***		***	12.8	***	12.3		16.9		15.3		12.7		10.6		10.2		10.7		9.3		0			***	197.915		78			***		***	0.0064			***	1006.9		2.78
1986-04-28	12.3	***	18.2	***	8.1	***	12.4	***	12.5		15.2		15.1		13		10.8		9.5		9.6		8.7		18.5			***	23.148		6			***	374.13		-0.0103	*		***	1006.8		2.29
1986-04-29	12.1		16.7		8.3		12		11.8		15		14.3		13.2		11		4.7		4.8		4.2		0.5			***	240.739		86			***	320.089		0.0186			***	1015.6		1.43
1986-04-30	12.4		18.7		5.5		12.9		13.2		15.1		14.6		13.2		11.2		2.6		2.6		1.7		0			***	296.294		86			***	307.206		0.0225			***	1020.8		1.02
1986-05-01	14.6		21		5.7		14.8		15.1		15.9		14.8		13.3		11.3		5.6		5.5		4.9		0			***	255.785		86			***	329.973		0.0166			***	1018.2		1.11
1986-05-02	16.2		18.3		13.5		16.4		16.3		16.6		15.4		13.4		11.4		10.3		10.3		9.5		0			***	77.5458		27			***	382.067		0.004			***	1009.3		0.79
1986-05-03	14.4		17		10.8		14.8		14.9		15.9		15.3		13.6		11.5		5.9		6.1		5.5		0			***	77.5458		22			***	370.851		0.0022			***	1013.8		0.96
1986-05-04	13.9		19.5		8.8		14.2		14.4		15.4		14.7		13.7		11.7		7.1		7.1		6.3		0			***	124.999		31			***	357.541		0.0088			***	1013.9		0.69
1986-05-05	14		20.2		7.6		14.4		14.5		15.7		14.9		13.6		11.8		7.3		7.1		6.3		0			***	190.971		65			***	343.671		0.0113			***	1014		1.3
1986-05-06	15.1		18.3		12		15.1		15		16.5		15.4		13.7		11.9		9.8		9.8		9.1		19			***	129.629		50			***	364.668		0.0079	*		***	1006		1.57
1986-05-07	18.1		24.3		13.6		18.2		18		18.8		16.7		13.9		12		9.3		9.3		8.8		0			***	291.665		105			***	345.878		0.0144	***		***	1001.2		1.02
1986-05-08	19.1		27.4		10.8		19.6		19.8		19		17.4		14.2		12.1		9.1		8.9		8.1		0			***	278.933		86			***	353.127		0.0266	*		***	1007.1		1.01
1986-05-09	19		25.3		13.5		19.4		19.4		19.2		17.8		14.6		12.2		10.8		10.5		9.9		0			***	288.193		98			***	353.933		0.0083			***	1001.7		1.93
1986-05-10	13.9		19		11.5		14.1		14.1		17.5		17.2		14.9		12.4		5.2		4.9		4.4		0			***	282.406		105			***	322.368		0.0128			***	1007.4		1.79
1986-05-11	14.5		17		10.8		14.4		14.2		17		16.5		15.1		12.5		8.8		8.4		8		0			***	74.0736		28			***	373.878		0.0088			***	1006.5		0.75
1986-05-12	13.6		16.1		8		13.8		13.6		16.3		16.1		15.1		12.6		6.9		6.6		6.2		0			***	141.203		50			***	353.032		0.001			***	1010.4		1.82
1986-05-13	13.3		18		7.6		13.6		13.7		16.2		15.7		15		12.8		4.7		4.6		4.3		0			***	261.572		88			***	323.875		0.0108			***	1016.3		1.62
1986-05-14	15.3		20		10.7		15.3		15.3		16.7		16.1		15		12.9		9.4		9.1		8.7		25			***	144.675		55			***	362.945		0.0038	*		***	1008.3		2
1986-05-15	15.5		20		11.6		15.4		15.2		17.5		16.6		15.2		14		11.4		11		10.7		32.5			***	99.5364		60			***	374.846		0.0028			***	992.3		2.08
1986-05-16	13.9		18.8		10.8		13.9		13.8		17		16.3		15.4		14		7.9		7.6		7.4		7.5			***	159.721		70			***	351.553		0.0058			***	998.7		1.22
1986-05-17	15.6		22.5		7.5		16		16.2		17.9		16.7		15.4		13.9		7.6		7.1		6.6		0			***	300.924		123			***	331.504		0.022			***	1007.6		0.89
1986-05-18	17.3		24.4		9.9		17.9		17.9		18.6		17.4		15.5		13.8		10.1		9.6		9.1		0			***	244.211		99			***	354.316		0.0152			***	1011.7		0.75
1986-05-19	18.4		22		14.2		18.8		18.9		18.3		17.5		15.7		13.8		13.1		12.6		12.1		0			***	75.231		24			***	396.581		-0.0019			***	1004.2		1.16
1986-05-20	16.7		19.8		13.5		16.7		16.6		17.9		17.3		15.9		13.8		12.9		12.6		12.2		11			***	32.4072		12			***	396.359		-0.0073			***	995.8		1.65
1986-05-21	12.3		15.4		9.8		12.4		12.5		16		16.2		15.9		13.9		7.9		7.9		7.7		2			***	56.7126		20			***	366.631		-0.003			***	1002.2		1.2
1986-05-22	13.3		17.3		9.5		13.3		13.1		16.4		15.8		15.8		13.9		5.8		5.6		5.6		0			***	199.073		76			***	339.065		0.012			***	1006.6		0.98
1986-05-23	13.9		19.1		8.3		14		13.9		17.2		16.4		15.7		14		5.5		5.2		5		0			***	288.193		118			***	323.8		0.016			***	1009.7		1.2
1986-05-24	16.7		21.7		10.9		16.9		17		17.7		16.7		15.7		14		8.8		8.5		8.2		0			***	201.388		87			***	358.526		0.0065			***	1005.8		1.48
1986-05-25	17.6		24.2		8.7		18.6		18.8		18.1		17.3		15.8		14		3.5		3.5		3.8		0			***	225.693		90			***	351.556		0.0107			***	1002.1		1.22
1986-05-26	13.4		19		7.4		14.3		14.7		17.2		16.8		16		14.1		0.9		1.1		1.6		0			***	303.239		125			***	312.461		0.0154			***	1008.8		1.08
1986-05-27	15.1		23.5		5.6		15.8		16.3		17.4		16.8		16		14.1		3.5		3.6		3.4		0			***	306.711		114			***	323.194		0.0014	*		***	1012		1
1986-05-28	17.9		24.1		11.3		18		18		18.6		17.5		16.1		14.1		8.6		8.2		7.9		0			***	302.081		120			***	345.303		0.0125			***	1012.3		1.44
1986-05-29	18.2		22.5		14.6		18.3		18.2		18.8		17.9		16.3		14.2		12.1		11.8		11.5		3			***	133.101		57			***	383.587		0.0048	*		***	1008.6		1.13
1986-05-30	16.7		17.6		15.8		16.7		16.6		18.2		17.6		16.5		14.3		13.5		13.1		12.8		32.5			***	49.7682		27			***	393.018		-0.0032			***	995		1.48
1986-05-31	20.3		27.2		15.8		20.1		19.9		21.2		19		16.6		14.5		13.4		13		13		1.5			***	295.137		149			***	366.73		0.0166			***	998.1		1.26
1986-06-01	21.1		26.7		16.5		21.1		21		21.6		19.9		16.9		14.5		14.7		14.1		13.9		0			***	199.073		94			***	389.531		0.0103			***	1006.5		0.88
1986-06-02	21.8		27.9		16.8		22.1		22		22.3		20.6		17.2		14.6		15.3		14.9		14.5		0			***	249.998		114			***	385.606		0.012			***	1006.5		0.89
1986-06-03	19		21.8		16.4		19.2		19.1		20.8		20.1		17.6		14.7		15.1		14.6		14		0			***	78.7032		28			***	400.599		0.0012			***	1005.2		0.97
1986-06-04	15.7		18.4		13.4		15.6		15.4		19.6		19.3		17.8		14.8		10.8		10.5		10		0			***	199.073		96			***	357.212		0.0044			***	1008.7		2.03
1986-06-05	15		19.8		12.4		14.8		14.5		19.2		18.8		17.8		14.9		7.3		7		6.8		0	***		***	267.359		116			***	336.786		0.0056			***	1014.1		2.14
1986-06-06	14.6		16.7		10.7		14.7		14.6		17.7		17.9		17.7		15.1		9.3		9		8.6			***		***	56.7126		22			***	379.397		0.0018			***	1008.6		1.23
1986-06-07	16.9		19.9		15		16.8		16.7		18.8		18		17.6		15.2		12.5		12.2		11.9		5.5			***	79.8606		40			***	387.834		0.0106	***		***	1000.5		0.74
1986-06-08	18.7		24.6		13.8		19.1		19.2		19.9		18.7		17.5		15.2		13.3		13.1		12.7		1.5			***	232.637		101			***	369.634		0.0128			***	1003.2		0.76
1986-06-09	20.4		27.7		12.5		21		21.2		20.7		19.3		17.6		15.3		12.8		12.4		11.7		0			***	282.406		126			***	369.06		0.0231	*		***	1004.3		0.98
1986-06-10	18.1		22		12.9		18.3		18.2		20		19.5		17.8		15.3		6.6		6.5		6.4		0			***	202.545		83			***	364.039		0.0013	*		***	1011.1		1.4
1986-06-11	17.2		23.8		10.5		17.8		18		19.4		18.9		17.9		15.4		6.9		6.7		6.5		0			***	312.498		121			***	338.462		0.009			***	1013.6		1.37
1986-06-12	17.3		24.3		9.1		18.4		18.9		19.4		18.9		18		15.5		6.3		6.1		5.7			***		***	319.442		126			***	336.81		0.0151			***	1017.6		0.83
1986-06-13	18.7		26.2		10.1		19.4		19.9		19.9		19.1		18		15.5		9.5		9.3		8.8		0	*		***	297.452		121			***	352.863		0.0171			***	1016.4		0.7
1986-06-14	18.7		24.2		12.6		19.7		19.9		19.8		19.3		18.2		15.6		10.7		10.4		9.9		0			***	200.23		75			***	372.484		0.0077			***	1013.7		0.75
1986-06-15	20.8		26.6		13.6		21		21		20.7		19.6		18.2		15.7		11.9		11.5		11.1		0			***	303.239		131			***	366.373		0.0314	*		***	1010.3		1.47
1986-06-16	21.6		25.6		16.8		21.7		21.5		21.2		20.1		18.4		15.7		13.3		12.9		12.7		0			***	189.814		83			***	392.709		-0.0014			***	1008.8		1.61
1986-06-17	21.3		23		19		21.3		21.2		21.4		20.3		18.6		15.8		17.9		17.7		17.2		16			***	59.0274		27			***	418.417		-0.0088			***	1004.6		1.14
1986-06-18	21.6		22.6		19.8		21.6		21.4		22.2		20.9		18.7		15.9		18		17.5		17.4		20.5			***	94.9068		52			***	413.946		-0.006	***		***	999.2	*	1.95
1986-06-19	21.7		25.9		17.6		21.7		21.6		22.8		21.4		19		16		16.3		15.7		15.7		15			***	255.785		129			***	386.475		0.0088			***	1001.2	*	1.24
1986-06-20	20.8		25.8		17.4		20.7		20.5		22.7		21.6		19.3		16.2		14.5		13.9		14.2		0.5			***	263.887		131			***	377.513		0.0125			***	1004.4		1.42
1986-06-21	17.3		18.1		16.8		17.4		17.2		20.5		20.6		19.5		16.3		12.7		12.1		12.1		0.5			***	28.935		10			***	400.697		-0.0024			***	1008.1		0.91
1986-06-22	20		23.9		16.5		19.8		19.7		21.5		20.4		19.5		16.4		14.1		13.3		13.4		0			***	194.443		92			***	384.505		0.0127			***	1007.9		0.78
1986-06-23	20		23.1		17.2		20		19.9		21.3		20.6		19.4		16.5		15.9		15.1		15		0			***	94.9068		39			***	403.866		0.0018			***	1009.8		0.85
1986-06-24	20.2		23.1		18.1		20.1		19.9		21.7		20.8		19.4		16.6		16		19.7	***	15.3		1.5			***	128.471		64			***	399.104		0.0078	***		***	1009.4		1.05
1986-06-25	21.1		23.3		19.2		21		20.9		21.8		20.9		19.5		16.7		18.2		21.1	***	17.4		10			***	70.6014		38			***	415.443		0.0003			***	1004.9		0.98
1986-06-26	22		28.2		17.3		21.9		21.9		23.1		21.7		19.5		16.7		17.4		17.8	***	16.7		4.5			***	216.434		104			***	395.813		0.0131			***	994.5		1.19
1986-06-27	18.6		21.7		14.6		18.9		19		21.3		21		19.8		16.8		13.5		14.9	***	12.7		0			***	201.388		88			***	375.187		0.0043			***	1002.8		1.36
1986-06-28	18.1		19.8		17.3		18		17.8		20.6		20.4		19.8		16.9		13.5		13.9	***	12.6		0			***	87.9624		44			***	393.395		-0.0028			***	1003.3		1.82
1986-06-29	15.9		16.8		14.9		15.9		15.8		19.4		19.6		19.7		16.9		12.4		13.1	***	11.9		11			***	57.87		30			***	387.059		-0.0037			***	1000.5	*	1.68
1986-06-30	17		18		15.5		16.9		16.8		19		18.9		19.5		17.2		14.3		15.8	***	13.7		23			***	47.4534		24			***	395.559		-0.0136	***		***	998.7	*	0.76
1986-07-01	19.9		25.7		17		19.6		19.5		20.9		19.8		19.2		17.4		15.1		16.8	*	14.5		2.5			***	204.86		119			***	383.332		0.0118			***	999.2		1.34
1986-07-02	16.6		17.3		15.8		16.6		16.5		19.5		19.5		19.3		17.3		13.5		14.6		12.8		13.5			***	49.7682		29			***	392.749		-0.0319	*		***	1002.8		1.87
1986-07-03	17.6		20		15.8		17.5		17.4		19.5		19.1		19.3		17.4		12.7		13.4		12.1		2			***	109.953		66			***	385.961		-0.0311	***		***	1004		1.66
1986-07-04	18.8		21.5		16.2		18.7		18.6		19.9		19.3		19.1		17.4		13.7		14.4		13		1			***	89.1198		52			***	397.09		0.0044			***	1009.2		0.79
1986-07-05	21.4		25.7		18.3		21.4		21.3		21.3		20.1		19.1		17.3		17		16.9		16.3		10			***	114.583		64			***	408.848		0.0046			***	1007.4		0.84
1986-07-06	22		26.8		19.3		21.8		21.6		22.3		20.9		19.2		17.3		17.8		17.6		17.1		3			***	138.888		81			***	408.666		0.008			***	999.2		1.27
1986-07-07	19.4		20.8		18.5		19.4		19.2		21.2		20.7		19.5		17.3		15.2		15.2		14.3		0			***	52.083		27			***	408.136		-0.002			***	1006.7		1.23
1986-07-08	21.6		25.2		18		21.6		21.5		22		20.8		19.5		17.3		15.9		15.8		15.1		0			***	188.656		102			***	396.222		0.0105			***	1010.2		0.83
1986-07-09	22.2		25.3		18		22.3		22.3		22.3		21.2		19.7		17.3		17.8		17.1		16.9		0			***	122.684		59			***	412.582		0.005			***	1010.8		0.67
1986-07-10	22.6		26.5		19.6		22.8		22.8		22.6		21.5		19.8		17.4		19.1		18.1		18.2		2.5			***	89.1198		42			***	421.303		0.0047			***	1008.5		0.62
1986-07-11	20.3		21.6		19.5		20.2		20		22		21.4		19.9		17.4		16.9		16		16		0			***	76.3884		44			***	409.304		-0.0041			***	1012		1.74
1986-07-12	20.6		22		19.3		20.5		20.4		21.7		21.1		20		17.5		17.7		16.6		16.7		0.5			***	59.0274		36			***	414.362		-0.0007			***	1010.3		1.15
1986-07-13	22.6		26.4		19		23		23		22.6		21.5		20		17.5		19.4		18.3		18.4		2			***	93.7494		44			***	420.666		0.004			***	1005		0.73
1986-07-14	23.4		28.7		18.5		23.5		23.4		23.2		21.8		20		17.5		17.9		16.9		17.2		0			***	230.323		124			***	402.016		0.0019	*		***	1006.8		1.19
1986-07-15	21.3		24.4		19.1		21.3		21.2		22.7		22		20.2		17.6		18.5		17.9		17.7		10.5			***	52.083		28			***	419.751		-0.0047			***	1005.7		1.44
1986-07-16	21.1		24.8		19.1		21		20.9		22.2		21.5		20.4		17.6		18.3		17.5		17.7		7.5			***	62.4996		33			***	416.737		0.0008			***	1006.2		1
1986-07-17	20.7		22.2		19.6		20.6		20.5		22		21.4		20.4		17.7		17.6		17.1		16.8		3			***	64.8144		39			***	413.767		-0.0013			***	1004.3		1.35
1986-07-18	25		31.8		20.2		24.9		24.7		24		22.2		20.4		17.8		20.4		19.6		19.8		1.5			***	229.165		131			***	414.904		0.0366	***		***	998.2		0.68
1986-07-19	23.9		29.6		19.3		24		24		24.5		23.2		20.6		17.8		18.3		17.4		17.4		0			***		***	113			***		***	0.0075			***	1003.3		1.34
1986-07-20	19.1		21		17.5		19		18.8		22.1		22.1		20.8		17.9		13.8		13.1		13.1		0			***	86.805		47			***	398.943		-0.0022			***	1008.5		1.62
1986-07-21	18.3		19.8		16.6		18.2		18.1		21		21.1		20.8		18		14.5		14		13.9		2			***	63.657		33			***	399.407		-0.0075	***		***	1008.6		1.12
1986-07-22	19.7		21.6		17.7		19.7		19.5		21.1		20.7		20.7		18		17.3		16.6		16.5		18			***	37.0368		18			***	412.982			***		***	1005.7		0.67
1986-07-23	23.8		28.8		19.7		23.5		23.3		23.3		21.7		20.5		18.1		18.8		18		18.3		1			***	226.85		130			***	405.653		0.0145	***		***	1001.7		0.93
1986-07-24	23.5		26.7		20.3		23.6		23.5		23.8		22.6		20.6		18.2		16.8		16.1		16.3		0			***	233.795		123			***	399.614		0.0055			***	1006.7		1.11
1986-07-25	22.3		24.9		20.2		22.2		22		23.3		22.5		20.9		18.2		16.8		16.2		16		0			***	145.832		80			***	407.73		0.0001			***	1009.6		1.4
1986-07-26	23.6		27.6		20.6		23.5		23.4		23.7		22.6		21		18.2		18.7		18.4		17.9		0			***	162.036		83			***	414.393		0.0035			***	1010.7		1.05
1986-07-27	25.2		29.6		22.1		25.2		25.1		24.5		23.2		21.1		18.3		20.5		20.4		19.6		0			***	158.564		80			***	426.184		0.0055			***	1011.2		0.84
1986-07-28	26.2		31.8		20.9		26.4		26.4		24.9		23.5		21.3		18.3		20.6		20.4		19.7		0			***	188.656		98			***	427.562		0.0062			***	1011.2		0.64
1986-07-29	27.1		33.3		21.4		27.3		27.3		25.6		24.1		21.5		18.4		20.9		21.5		20		0			***	244.211		123			***	425.33		0.0348	*		***	1010.9		0.64
1986-07-30	26.7		32.5		21.7		27		27.1		25.7		24.4		21.7		18.4		20		22.2		19.2		0			***	238.424		117			***	422.027		0.017	*		***	1010.9		0.79
1986-07-31	26.7		32.8		21.5		27.1		27.2		25.8		24.5		21.9		18.5		20.2		22.4		19.3		0			***	256.943		125			***	419.76		0.0225	*		***	1011.7		0.67
1986-08-01	25.6		31.1		20.8		25.9		26		25.5		24.5		22.1		18.6		20.2		21.8		19.2		0			***	255.785		124			***	413.733		0.0129			***	1012.4		0.85
1986-08-02	24		27.7		20.5		24		23.8		25.3		24.4		22.3		18.7		18.8		20.5		18		0			***	225.693		97			***	406.487		0.004			***	1011.9		1.22
1986-08-03	23.2		27.8		18.8		23.4		23.4		24.6		24		22.3		18.8		17.4		17.2		16.6		0			***	232.637		107			***	398.421		0.0077			***	1007.3		1.02
1986-08-04	20.7		23.7		19.1		20.9		20.8		22.2		22.7		22.3		19.3		17.4		16.7		16.8		181.5			***	28.935		11			***	420.002		0.0322	***		***	995.8		1.61
1986-08-05	25.3		32.7		20.8		25.4		25.3		23.9		22.5		22.2		21.1		18.7		17.9		18.3		61.5			***	244.211		136			***	409.546		0.0176			***	984.9		1.14
1986-08-06	26		32		20.3		26		26		25.1		23.8		22.1		21.1		17.4	*	16.8	***	16.7	*	16			***	254.628		131			***	409.482		0.0164			***	997		0.81
1986-08-07	25.2		29.4		22.3		25.2		25		25.3		24.2		22.4		20.9		17.4	*	19.8	***	18.1		0	*		***		***	107			***		***	0.005			***	1002.7		1.25
1986-08-08	22.8		25.6		21.8		22.8		22.6		24.3		23.8		22.6		20.7		17.7		21.8	***	17.5		1			***	105.323		54			***	417.745		-0.0006			***	1007.7		1.07
1986-08-09	23.8		27.4		21.5		23.7		23.5		24.6		23.8		22.6		20.5		18.2		20.9	***	17.9		0			***	182.869		95			***	410.524		0.0011			***	1011.4		1.62
1986-08-10	26.2		31.4		22.1		26		25.9		25.8		24.4		22.6		20.4		19.8		21.5	***	19.6		0			***	243.054		124			***	417.233		0.0114			***	1013.7		0.92
1986-08-11	26.2		31.4		21.6		26.4		26.5		25.8		24.8		22.8		20.3		19.8		21.4	***	19.4		0			***	219.906		105			***	420.496		0.0106			***	1011.7		0.67
1986-08-12	25.8		30.6		21.8		25.9		25.8		25.6		24.7		22.9		20.2		18.7		20.6	***	18.6		0			***	178.24		80			***	422.851		0.0009			***	1008.3		0.97
1986-08-13	26.2		30		22.9		26.2		26.1		25.7		24.8		23		20.2		19.9			***	19.7		0			***	165.508		80			***	428.829		0.0008			***	1007.9		1.15
1986-08-14	26.8		31		23.4		26.8		26.7		26.1		25		23.1		20.2		19.3			***	19.2		0			***	222.221		104			***	422.217		-0.0005			***	1010.2		1.29
1986-08-15	25.9		29.9		22.9		26.1		26.1		25.8		24.9		23.2		20.2		19.5			***	19.4		0			***	156.249		71			***	427.956		0.0022			***	1010.3		0.84
1986-08-16	26.4		31.1		22.6		26.4		26.4		25.9		25		23.2		20.2		19.4			***	19.3		0			***	196.758		99			***	423.882		0.0086			***	1007.9		0.71
1986-08-17	25.2		29.1		22.5		25.2		25.1		25.8		25		23.3		20.3		19.3			***	19.2		0			***	179.397		92			***	419.618		0.0079			***	1006.5		1
1986-08-18	23.4		24.8		22.5		23.4		23.3		24.9		24.6		23.3		20.3		19			***	18.8		0			***	71.7588		34			***	427.593		-0.0031			***	1005.6		1.02
1986-08-19	22.7		24.4		19.5		22.9		22.9		24.2		24		23.3		20.3		18.1			***	17.7		0			***	56.7126		21			***	425.92		-0.0005			***	1004		0.68
1986-08-20	24.9		30.7		19.6		25.1		25.1		24.7		23.9		23.1		20.4		19.3			***	19.1		0			***	159.721		81			***	420.701		0.0126			***	998.8		0.44
1986-08-21	25.7		32.4		21.9		25.7		25.6		25.4		24.4		23		20.4		19.7			***	19.5		0			***	189.814		99			***	420.727		0.0076			***	998.9		1.13
1986-08-22	23.7		26.7		21.3		23.5		23.3		25		24.4		23		20.4		18.1			***	17.8		0			***	190.971		96			***	406.968		-0.001			***	1007.4		2.11
1986-08-23	22.4		24.1		19.8		22.4		22.2		23.9		23.9		23.1		20.4		14.9			***	14.6		0			***	74.0736		33			***	418.977		-0.0053			***	1010.6		1.56
1986-08-24	22		26.5		17.9		21.9		21.7		23.6		23.3		22.9		20.4		13.5			***	13.6		0			***	248.841		112			***	379.562		0.0174			***	1010.6		1
1986-08-25	23.5		29.7		16.7		23.7		23.9		23.9		23.4		22.8		20.4		16.9			***	16.5		0			***	256.943		116			***	392.352		0.0249			***	1012		0.67
1986-08-26	24.3		30		18.4		24.5		24.5		24.4		23.7		22.7		20.4		18.7			***	18.1		0			***	217.591		104			***	406.383		0.002	***		***	1010.8		0.59
1986-08-27	26.1		31.7		21.2		26.2		26.3		25.4		24.3		22.7		20.4		20.3			***	19.9		0			***	206.017		101			***	420.916		0.0031	***		***	1008.3		1.35	***
1986-08-28	26.6		32		21.7		26.6		26.6	***	23.1	***	22.6	***	21.2	***	19	***	18.7			***	18.5		0			***		***	84			***		***	0.0055			***	1006.2		1.17	***
1986-08-29	26.6		31.3		22.4		26.6		26.5		25.9		24.7		22.9		20.3		20.4			***	20.1		0			***	201.388		92			***	424.204		-0.002			***	1002.9		1.9
1986-08-30	27.2		31.1		24.6		27.3		27.1		26.3		25.1		23		20.3		20.5			***	20.2		0			***		***	79			***		***	-0.0015			***	1002.1		1.75
1986-08-31	25.2		31.3		19		26.3		26.6		25.3		24.8		23.1		20.3		17			***	16.7		0			***	217.591		91			***	407.218		0.0158			***	1006.5		0.53
1986-09-01	24		30.1		18.7		24.2		24.2		24.5		24.1		23.1		20.4		18.5			***	17.9		0			***	207.175		92			***	405.144		0.0177			***	1010.8		1.12
1986-09-02	24.4		25.6		22.4		24.5		24.4		24.9		24.2		23.1		20.4		21.1			***	20.9		19			***	64.8144		35			***	435.002		0.0316	***		***	1005.9		1.58
1986-09-03	25.6		27.5		22.9		25.9		25.8		25.5		24.7		23.1		20.7		22.6			***	22.2		53.5			***	55.5552		24			***	444.324		0.0013	***		***	997.5		1.31
1986-09-04	27.1		34.7		20.2		27.7		27.9		25.6		24.7		23.2		20.9		17.6			***	18		0.5			***	246.526		118			***	412.74		0.0278	***		***	1003.7		0.79
1986-09-05	25.2		30.4		20.4		25.6		25.6		25.4		24.9		23.3		20.9		17.2			***	17.4		0			***	207.175		95			***	408.631		0.0129			***	1010.2		0.78
1986-09-06	22.4		26.1		19.7		22.5		22.5		24.5		24.4		23.3		20.8		17.2			***	17.4		12			***	114.583		51			***	410.906		0.0077			***	1012.5		0.63
1986-09-07	23.6		29.1		17.9		23.7		23.8		24.2		23.9		23.3		20.8		17.2			***	17.3		0			***	210.647		95			***	398.872		0.0193			***	1008.9		0.62
1986-09-08	23.7		27		20.5		23.7		23.5		24.6		24.1		23.2		20.8		17.5			***	17.4		0			***	157.406		72			***	409.649		0.01			***	1007.6		1.02
1986-09-09	22.4		25.9		20.1		22.4		22.2		24.1		23.8		23.2		20.8		16.9			***	16.9		7.5			***	146.99		74			***		***	0.0059			***		***	1.15
1986-09-10	22.6		26.4		20		22.5		22.4		23.8		23.6		23.1		20.8		17.8			***	17.8		4.5			***	111.11		57			***	412.657		0.0089	*		***	1002.9		0.81
1986-09-11	24.3		29.1		20		24.2		24.2		24.2		23.7		23		20.8		16.2			***	16.4		0.5			***	212.962		95			***	399.336		0.0189			***	1003.4		0.65
1986-09-12	20.9		22.8		19.6		20.9		20.9		23.1		23.3		23		20.8		16.1			***	16		2.5			***	40.509		14			***	417.264		-0.0037			***	1008.6		0.96
1986-09-13	22.4		27		19.8		22.2		22		23.4		23		22.8		20.8		17.2			***	14.4	***	13			***	156.249		81			***	401.489		0.0185	***		***	1008.1		0.94
1986-09-14	20.2		22.8		18.6		20.3		20.2		22.4		22.6		22.8		20.8		15			***	15.4		4.5			***	84.4902		37			***	402.432		0.0094	*		***	1008.4		0.69
1986-09-15	19.8		22.1		18.2		20.1		20.2		21.8		22		22.6		20.8		15.2			***	15.5		0.5			***	42.8238		11			***	410.087		0.0001			***	1010.1		0.44
1986-09-16	19.7		21.3		18.5		19.9		19.8		21.6		21.7		22.4		20.8		15.4			***	15.7		1			***	40.509		18			***	410.09		0.0014			***	1011.8		0.64
1986-09-17	20.6		22.2		19.1		20.7		20.6		21.7		21.6		22.1		20.7		16.7			***	16.9		10.5			***	32.4072		16			***	417.344		0.0178	***		***	1006.5		0.54
1986-09-18	22.8		27.9		18.7		22.8		22.7		22.8		22		21.9		20.7		18.1			***	18.3		0			***	158.564		77			***	403.477		0.0199			***	1004.7		0.57
1986-09-19	22.1		24.3		20		22.4		22.4		22.7		22.4		21.9		20.6		15.2			***	15.7		0			***	82.1754		38			***	413.047		0.0005			***	1009.3		0.72
1986-09-20	20.3		22		18.4		20.7		20.7		21.8		21.9		22		20.6		14.6			***	15.1		0.5			***	26.6202		9			***	416.585		-0.0026			***	1012.1		0.88
1986-09-21	19.2		20.7		17.1		19.1		19		21.2		21.3		21.8		20.5		15.6			***	15.7		0.5			***	35.8794		18			***	408.171		0.0058			***	1009.8		0.49
1986-09-22	24.4		30.3		18.9		24.5		24.4		23.1		22.1		21.6		20.4		17.8			***	18		0			***	179.397		83			***	406.757		0.0173			***	1004.5		1.03
1986-09-23	20.7		25.5		15.8		21.4		21.8		21.9		21.9		21.7		20.4		13.2			***	13.8		0			***	177.082		73			***	380.084		0.0124			***	1011.4		0.66
1986-09-24	21.5		27.1		15.7		21.7		21.9		21.7		21.6		21.6		20.3		15			***	15.1		0			***	186.341		74			***	384.704		0.0182			***	1009.6		0.58
1986-09-25	19.7		23.7		15.9		19.8		19.6		21.3		21.5		21.6		20.3		12.1			***	12.5		9.5			***	155.092		64			***	378.076		0.0234	*		***	1012.4		1.37
1986-09-26	19		24.2		14.5		19		18.9		20.6		20.9		21.5		20.2		10.1			***	10.8		2			***	215.276		82			***	356.8		0.0206	***		***	1015.5		0.95
1986-09-27	17.4		22.4		11.2		18.2		18.6		19.7		20.3		21.3		20.2		8.9			***	9.4		0			***	189.814		62			***	352.992		0.0109			***	1015.5		0.89
1986-09-28	18.5		25.2		10.6		18.7		18.7		19.4		19.7		21		20.1		11.3			***	11.5		0			***	199.073		76			***	359.388		0.0196			***	1012.5		0.8
1986-09-29	19		21.9		17.4		19.2		19.2		19.7		19.9		20.8		20.1		13.2			***	13.5		0.5			***	47.4534		4			***	402.652		0.0038			***	1005.5		1.18
1986-09-30	19.6		26		14		19.9		20		20		19.9		20.7		20		12.4			***	12.6		0			***	193.286		72			***	367.285		0.0185			***	1010		0.75
1986-10-01		***	19.3	***		***		***		***		***		***		***		***	9	***	27.5	***	8.9	***	4	***		***	5.787	***	-6	***		***		***	-0.0054	***		***		***	0.74
1986-10-02	19.6		22.5		17.1		19.9		20		20.1		19.8		20.4		19.9		15.7			***	15.5		7			***	84.4902		37			***	397.229		0.0198	*		***	1010.4		0.83	***
1986-10-03	20.3		24.6		17.9		20.4		20.3		20.6		20.2		20.3		19.8		14.6			***	14.5		0			***	140.045		55			***	386.015		0.0031			***	1011.6		1.02
1986-10-04	18.4		22		16.4		18.5		18.4		19.9		20		20.3		19.7		12.4			***	12.4		0			***	93.7494		37			***	385.417		0.0129			***	1013.3		0.94
1986-10-05	18.2		22.4		13.4		18.6		18.6		19.5		19.7		20.3		19.7		10.8			***	10.8		0			***	142.36		58			***	369.283		0.0175			***	1015.4		1.06
1986-10-06	18		23		12.8		18.5		18.6		19		19.2		20.2		19.6		11.6			***	11.9		0			***	124.999		49			***	373.572		0.0154			***	1013.8		0.47
1986-10-07	17.5		20.1		15.8		17.7		17.6		18.9		19.2		20		19.6		11.3			***	11.3		8			***	63.657		25			***	388.024		-0.001	*		***	1013.6		1.56
1986-10-08	13.3		16.2		7.9		14.3		14.6		16.8		18.1		19.9		19.5		8.3			***	8.2		17			***	23.148		-7			***	377.496		0.0028			***	1004.5		1.26
1986-10-09	15.2		22.5		7.3		16.4		16.9		16.2		16.9		19.5		19.5		8.8			***	8.1		0			***	180.554		71			***	340.249		0.0197			***	1011.9		0.51
1986-10-10	16.4		21		10.3		16.9		17		17		17.3		19.1		19.4		10.8			***	10.2		0			***	105.323		35			***	369.057		0.0067			***	1014.3		1.06
1986-10-11	16.3		18.6		14.7		16.4		16.2		17.6		17.6		18.9		19.3		12.1			***	12		15			***	32.4072		8			***	390.949		0.0023			***	1006.6		1.01
1986-10-12	14.4		16.9		12.8		14.4		14.3		17.2		17.4		18.8		19.2		9.4			***	9.7		1			***	92.592		48			***	360.922		0.0086			***	1005.3		0.86
1986-10-13	14.8		21.1		8.3		15.2		15.5		16.6		17		18.7		19		9.9			***	9.4			***		***	178.24		71			***	338.957		0.0303	*		***	1008.5		0.5
1986-10-14	15		21.5		8.9		15.8		16		16.5		16.9		18.5		18.9		8.5			***	8.6		0			***	164.351		58			***	341.367		0.0175			***	1012.6		0.48
1986-10-15	15.6		22.8		9.5		16.8		17.4		16.5		16.7		18.3		18.8		9.8			***	9		0			***	167.823		55			***	344.689		0.0215			***	1011.9		0.44
1986-10-16	15.3		22.8		9.8		16.6		17.3		16.4		16.7		18.2		18.7		9.9			***	9.1		0			***	158.564		50			***	345.496		0.0181			***	1008.8		0.48
1986-10-17	13.2		20		8.6		13.8		14		15		16.1		18		18.6		2.3			***	2.3		0			***	174.767		56			***	320.37		0.0157			***	1009.1		1
1986-10-18	8.2	*	16.1	*	0	*	8.8	*	9		13.5		15.1		17.8		18.5		-1			***	-0.1		0			***	171.295		39			***	295.628		0.0233			***	1018.2		0.53
1986-10-19		***		***		***		***			12.5		14.1		17.5		18.4		1.4			***	1		0			***	134.258		23			***		***	0.0134			***	1020.7		0.93
1986-10-20		***		***		***		***			12.3		13.7		17		18.6		-0.6			***	-0.7		0			***	184.027		41			***		***	0.0212			***	1023.7		0.76
1986-10-21		***		***		***		***			12		13.2		16.6		18.4		3.4			***	3.1		0			***	173.61		50			***		***	0.021			***	1018.9		0.58
1986-10-22		***		***		***		***			13.6		13.9		16.3		18.3		6.1			***	6.4		1.5			***	49.7682		7			***		***	0.0026			***	1007		0.66
1986-10-23		***	15.9	***		***	7.5	***	7.6		11.6		13.2		16.1		18.1		-1.8			***	-1.2		0			***	177.082		49			***		***	0.0283			***	1017.5		0.41
1986-10-24	10.7		15.8		4.8		11.1		11.1		12.2		12.9		15.9		18		3.6			***	3.8		0			***	81.018		26			***	339.753		0.0136			***	1021.2		0.43
1986-10-25	11.9		19		6.8		12.5		12.7		12.9		13.3		15.6		17.8		6.4			***	6.2		0			***	119.212		26			***	333.941		0.0144			***	1015.8		0.59
1986-10-26	12.9		19.5		5.8		13.3		13.6		13		13.3		15.5		17.6		7.1			***	6.9		0			***	120.37		35			***	338.523		0.0145			***	1009.3		0.64
1986-10-27	12.9		15.4		10.8		13.1		13.1		13.9		14		15.4		17.5		7.5			***	7.9		2			***	60.1848		15			***	359.698		-0.0007	***		***	1007.4		0.99
1986-10-28	11.4		15.5		8.2		12.3		12.6		13.2		13.7		15.4		17.4		5.9			***	6		0			***	56.7126		10			***	352.571		0.0072			***	1013.7		0.37
1986-10-29	12.3		15.8		8.5		12.5		12.6		13.1		13.4		15.4		17.2		7.8			***	7.7		0.5			***	46.296		7			***	361.694		0.0038			***	1013.1		0.51
1986-10-30	11.5		14.9		4.7		11.9		12		13.6		13.9		15.3		17.1		7.6			***	7.9		3			***	54.3978		7			***	354.347		0.0034			***	1012.1		0.88
1986-10-31	7.7		15.1		0.7		9.4		10.1		11.2		12.6		15.2		17		0.5			***	-0.2		0			***	164.351		33			***	291.107		0.0274			***	1023.2		0.47
1986-11-01	9.1		15.4		2.2		9.5		9.7		10.8		11.8		15		16.9		3.7			***	3.5		5.5			***	83.3328		24			***		***	0.0202	*		***		***	0.48
1986-11-02	13.3		19.8		8.3		14		14.1		13.2		13		14.7		16.8		7.8			***	8.6		0.5			***	130.786		40			***		***	0.0187			***		***	0.56
1986-11-03	13.8		19.5		6.6		15		15.6		13		13		14.6		16.7		8.4			***	7.6		0			***	113.425		39			***		***	0.0115			***		***	0.57
1986-11-04	15.6		19.9		13		15.5		15.4		14.8		14.1		14.6		16.6		8.8			***	8.9		9			***	99.5364		42			***		***	0.0308	***		***		***	0.92
1986-11-05	11.4		13.2		8.7		11.6		11.5		13.6		13.9		14.8		16.5		4.8			***	5.1		0.5			***	16.2036		-6			***		***	-0.0023			***		***	0.97
1986-11-06	9		16.9		2.9		10.3		10.9		12		12.9		14.8		16.4		3			***	2		0			***	140.045		30			***		***	0.0228			***		***	0.43
1986-11-07	10.6		15.4		4.1		11.4		12		11.6		12.2		14.6		16.3		5.3			***	5.3		0			***	46.296		12			***		***	0.0062			***		***	0.43
1986-11-08	11		19.2		5		12		12.4		12.2		12.5		14.4		16.3		4.3			***	3.9		0			***	108.796		22			***	326.012		0.0154			***	1010.9		0.49
1986-11-09	10.4		13.1		7.3		10.7		10.7		11.8		12.3		14.3		16.2		4.8			***	4.5		5.5			***	24.3054		3			***	358.897		-0.0023	*		***	1012.7		1.14
1986-11-10	11.7		19.4		5.8		13		13.3		12.2		12.4		14.1		16.1		4.1			***	4.5		5.5			***	148.147		41			***	312.952		0.0237	*		***	1003.4		0.62
1986-11-11	7.9		14.4		-0.3		9		9.4		10.4		11.7		14		16		-2.7			***	-2.9		0			***	150.462		20			***	287.18		0.0127			***	1008.9		1.14
1986-11-12	6.8		14.1		-1.3		8.8		9.8		9		10.5		13.8		15.9		-2.1		-1.2		-1.9		0			***	131.944		28			***	290.411		0.0188			***	1020.9		0.45
1986-11-13	8.7		13		6.1		9.3		9.6		10.3		10.8		13.4		15.8		2.6		3.2		2.3		0			***	46.296		7			***	339.166		0.0083			***	1017.5		0.46
1986-11-14	11.1		18.6		4.7		12.1		12.7		10.9		11		13.2		15.7		4.5		5.3		4.6		0			***	104.166		28			***	326.205		0.0197			***	1012.7		0.37
1986-11-15	10.6		15.1		7		11.3		11.6		11.3		11.5		13.1		15.6		4.5		5		4		0			***	52.083		10			***	346.074		-0.0007			***	1009		0.79
1986-11-16	8.1		14		1.1		9.1		9.3		9.9		11		13.1		15.5		-3.9		-3.1		-3.8		0			***	100.694		8			***	306.056		0.0085			***	1012.6		1.09
1986-11-17	5.5		9.2		-1.3		6.3		6.5		8.6		9.9		13		15.3		-2.3		-1.8		-2.6		0			***	39.3516		3			***	324.972		0.0089			***	1017.5		0.39
1986-11-18	5.7		14.6		-1.5		7.8		8.5		8.4		9.6		12.7		15.3		0.1		0.3		-1.6		0			***	124.999		17			***	288.024		0.0221			***	1016.1		0.4
1986-11-19	4.8		12.1		-0.1		6.4		7.1		7.7		9		12.5		15.2		0.9		1.2		-0.4		0			***	53.2404		-1			***	315.714		0.0049			***	1014.8		0.33
1986-11-20	5.7		13.9		-1.2		7.3		8.1		7.3		8.4		12.1		15		0.8		0.9		-0.4		0			***	100.694		23			***	298.04		0.0175			***	1017.1		0.39
1986-11-21		***	13.2	*		***	6	*	6.7	*	6.5	*	7.5	*	10.3	*	13.1	*	0.7	*	0.8	*	-0.6	*	0	*		***		***	-2	*		***		***	0.0046	*		***		***	0.44
1986-11-22	8.1		16.6		0.6		9.6		10.2		8.5		9		11.6		14.8		0.7		1.1		0		0			***	119.212		22			***	299.503		0.0197			***	1022.5		0.55	*
1986-11-23	6		13.9		-2.3		7.4		8.2		7.3		8.4		11.5		14.6		-0.6		-0.1		-1.4		0			***	121.527		24			***	287.997		0.015			***	1028.4		0.5
1986-11-24	7.4		9.8		3.3		7.4		7.4		8.1		8.6		11.2		14.5		2.5		2.9		2		0			***	16.2036		7			***	346.278		0.0045			***	1023.4		0.5
1986-11-25	10.1		15.5		5.9		10.6		10.8		9.8		9.5		11.1		14.4		7		7.1		5.8		8			***	68.2866		27			***	335.528		0.0233	*		***	1006.4		0.53
1986-11-26	6.8		10.8		-1.8		7.5		7.8		8.5		9.4		11.2		14.2		-4.5		-4		-4.6		0			***	79.8606		1			***	306.521		0.0084			***	1012.9		1.4
1986-11-27	4.1		10.4		-1.2		5.4		5.8		6.7		8.1		11.2		14.1		-6		-5.8		-6		0			***	106.481		4			***	280.563		0.0142			***	1025.9		0.57
1986-11-28	5.1		8		-0.2		5.2		5.4		6.7		7.6		11		14		-1.5		-1.4		-1.8		0			***	18.5184		4			***	333.069		0.0049			***	1023.6		0.5
1986-11-29	6.5		13		2.1		6.6		6.7		7.8		8.2		10.7		13.9		0.4		0.7		0.2		0.5			***	64.8144		30			***	315.193		0.0053			***	1015.9		1.19
1986-11-30	3.6		8.4		0.5		4.5		4.9		6.9		7.9		10.7		13.8		-1.9		-1.5		-2.2		0			***	84.4902		12			***	291.068		0.0105			***	1020.6		0.45
1986-12-01	4.5		12.9		-2.7		5.8		6.4		6.6		7.5		10.6		13.7		-2.2		-2.2		-3.3		0			***	109.953		0			***	282.1		0.0181			***	1017.5		0.57
1986-12-02	3.4		10.9		-2.6		5.4		6.3		5.9		7.1		10.5		13.5		-3.1		-3		-4.5		0			***	112.268		5			***	275.487		0.0135			***	1023.1		0.43
1986-12-03	2.9		6.1		-1.8		3.2		3.4		5.4		6.6		10.3		13.4		-0.2		0		-1.1		3.5			***	20.8332		0			***	321.154		0.0048			***	1016.8		0.57
1986-12-04	7.2		11.4		4.9		7.5		7.7		7.1		7.2		10.1		13.3		1		1.3		0.4		0			***	38.1942		-6			***	331.816		0.0007			***	1002.2		0.86
1986-12-05	6.4		12.6		-0.4		7.6		8.1		6.7		7.4		10		13.2		-5.2		-4.9		-5.6		0			***	118.055		-2			***	281.484		0.0081			***	1010.6		1.25
1986-12-06	6.2		13.3		-1.8		7.4		8.1		6.6		7.1		10		13.1		-1.6		-1.5		-2.6		0			***	105.323		4			***	290.207		0.0075			***	1018.1		0.62
1986-12-07	7.2		16.7		-0.2		7.9		8.3		7.1		7.4		9.9		12.9		-1.2		-1.2		-2.5		0			***	98.379		-4			***	297.8		0.0104			***	1009		0.94
1986-12-08	2.7		10.8		-3.6		5.6		7.1		5.9		7.1		9.8		12.8		-6.2		-5.5		-6.4		0			***	115.74		-2			***	266.318		0.012			***	1017.9		0.41
1986-12-09	2.4		12.7		-3.3		4.6		6.3		5.1		6.3		9.7		12.7		-4.6		-4.3		-5.5		0			***	112.268		-4			***	267.866		0.0131			***	1019.2		0.51
1986-12-10		***	13.2	***	-4	***	4	***	4.7	***	4.3	***	5.1	***	7.9	***	10.5	***	-1.6	***	-1.6	***	-2.7	***	0	***		***	67.1292	***	-1	***		***		***	0.0078	***		***		***	0.5
1986-12-11	8.2		15.8		0.2		9.9		10.4		6.8		7.1		9.4		12.5		-3.9		-3.7		-4.5		0			***	113.425		-3			***	290.552		0.0085			***	1012.9		1.71	***
1986-12-12	4.2		12		-0.9		6		6.9		5.6		6.7		9.4		12.5		-0.4		-0.6		-2.5		0			***	47.4534		-2			***	311.321		0.0063			***	1018.5		0.48
1986-12-13	6.7		13.4		-2.1		7.7		8.2		6.1		6.4		9.3		12.4		1.5		1.2		-0.4		0			***	87.9624		9			***	302.192		0.0111			***	1022.9		0.7
1986-12-14	9		10.6		7.4		9.2		9.2		8.3		7.8		9.2		12.2		4.3		4.5		3.4		3			***	18.5184		1			***	351.932		0.0011			***	1013.6		0.46
1986-12-15	6.4		10.5		0.3		7.1		7.4		7.7		8.1		9.3		12.1		3		3.3		2.1		23			***	16.2036		-12			***	340.23		0.0116	***		***	1005.8		1.41
1986-12-16	2.7		9.7		-2.3		4.2		5.2		5.2		6.7		9.4		11.8		-3.6		-3.7		-4.7		0			***	114.583		-3			***	267.16			***		***	1016.6		0.59
1986-12-17	3.3		10.2		-3.4		4.6		5.2		4.1		5.8		9.1		11.7		-5.2		-4.9		-6		0			***	108.796		-10			***	270.756		0.0036			***	1020.3		0.91
1986-12-18	2.4		5.4		-2.7		2.7		3		4		5.3		8.8		11.7		-2.4		-2.1		-3		5			***	12.7314		-2			***	322.644		0.0175	***		***	1020.1		0.61
1986-12-19	8.2		12.9		3.9		8.3		8.4		7.4		6.4		8.4		10.7		4.7		5		4.1		34			***	33.5646		11			***	339.137		0.0004	***		***	996.6		1.33
1986-12-20	5.1		9.6		-3.5		6		6.4		5.9		6.8		8.3		10.3		-6.2		-5.7		-6.1		0			***	115.74		-2			***	272.789		0.008	***		***	1008.9		1.46	***
1986-12-21	1		7.5		-4.1		2.1		3		3.2		5.1		8.3		10.4		-4.9		-4.5		-5.2		0			***	49.7682		-8			***	293.218		0.0054	***		***	1014.7		1.38	***
1986-12-22	2.2		7.9		-2		3.1		3.6		3.2		4.6		8.1		10.5		-8.5		-8.1		-8.6		0			***	112.268		-7			***	261.462		0.0085	***		***	1015.2		1.51	***
1986-12-23	0.4		7.5		-4.8		2		2.7		2.1		3.9		7.8		10.6		-7.8		-7.6		-8		0			***	96.0642		-7			***	263.525		0.008	***		***	1019		1.27	***
1986-12-24	2.8		12.2		-3.6		4.8		6.1		3		3.9		7.5		10.6		-3.4		-3.4		-4.4		0			***	101.851		-2			***	273.042		0.0089	***		***	1011.6		1.2	***
1986-12-25	3.2		7.2		-1.8		4.3		5.3		2.8		3.9		7.3		10.6		0.1		-0.4		-1.7		0			***	20.8332		-14			***	321.577		0.0039	***		***	1012.6		1.25	***
1986-12-26	4.1		11.5		-2.2		5.5		6.2		3.8		4.3		7.1		10.5		-4.1		-4.3		-5.1		0			***	108.796		1			***	273.975		0.02	***		***	1014.8		1.41	***
1986-12-27	3.2		6.7		-1.3		3.9		4.2		3.5		4.2		7.1		10.5		-6		-5.7		-5.9		0			***	56.7126		5			***	297.973		0.0031	***		***	1017.6		1.41	***
1986-12-28	0.9		1.7		0		0.9		0.8		3.7		4.4		7		10.4		-2		-1.8		-2.5		10			***	28.935		8			***	305.803		0.0084	***		***	1007		1.64	***
1986-12-29	1		7.2		-4.6		2.6		3		2.9		4		6.9		10.3		-7.5		-7.1		-7.4		0			***	112.268		3			***	257.453		0.0081	***		***	1012.4		1.34	***
1986-12-30		***	9.1			***	2.7		3.8		1.8		3.3		6.8		10.2		-5.8		-5.7		-6.3		0			***	101.851		-5			***		***	0.0086	***		***	1017		1.41	***
1986-12-31	3.7		9.2		-1		4.5		4.9		3.4		3.6		6.6		10.1		-2.3		-2.3		-3		0			***	81.018		2			***	288.5		0.0066	***		***	1009.5		1.4	***
1987-01-01	3.9		7.6		-2.9		4.8		5		3		3.8		6.5		10.1		-8.6		-8.5		-8.9		0			***	122.684		-10			***	262.392		0.0097	***		***	1012.6		1.69	***
1987-01-02	-0.2		3.5		-5.2		0.6		1		1.3		3		6.5		10		-6.8		-6.8		-7		3.5			***	33.5646		-1			***	297.204		0.0037	***		***	1020.3		1.51	***
1987-01-03	4		9.4		0.4		4.6		4.8		4.5		3.8		6.3		9.9		0.5		0.4		-0.3		3.5			***	83.3328		19			***	290.931		0.011	***		***	1004.4		1.55	***
1987-01-04	4.5		10.6		-3		5.6		6		3.9		4.4		6.3		9.8		-7.1		-6.8		-6.9		0			***	121.527		-5			***	266.886		0.0086	***		***	1010.4		1.44	***
1987-01-05	-0.3		3.5		-3.1		0.2		0.4		2.2		3.6		6.4		9.7		-6.1		-5.9		-5.9		0			***	31.2498		0			***	298.451		0.0117	***		***	1017.3		1.12	***
1987-01-06	-0.1		3.3		-2.5		0.5		0.8		2.5		3.4		6.3		9.6		-2.9		-3		-3.9		9			***	114.583			***		***	256.963		0.0245	***		***	1014.4		1.34	***
1987-01-07	-0.5		4		-5.9		0.6		1.4		1.9		3		6.2		9.6		-4.8		-5		-5.9		0			***	67.1292			***		***	277.774		-0.0029	***		***	1019.1		1.05	***
1987-01-08	2.8		12.1		-2		4.3		5		2.6		3.1		6		9.5		-5.1		-5		-5.2		0			***	113.425		4			***	266.758		0.0032	***		***	1006		1.25	***
1987-01-09	4.1		12.9		-3.2		5.8		6.4		2.9		3.3		5.9		9.4		-3.8		-3.9		-4.3		0			***	115.74		2			***	272.139		0.0044	***		***	1006.4		1.35	***
1987-01-10	1.1		7.2		-1.9		1.4		1.5		2.7		3.5		5.8		9.3		-8.6		-8.6		-8.9		0			***	90.2772		-9			***	270.14		0.0104	***		***	1009.7		1.43	***
1987-01-11	-1.4		3.3		-5.9		-0.4		0		1.3		2.9		5.8		9.2		-12.4		-12.3		-12.5		0			***	126.157		-12			***	240.44		0.01	***		***	1020.3		1.16	***
1987-01-12	-1.3		1.4		-6.8		-1.1		-0.9		0.7		2.3		5.7		9.1		-6.3		-6.3		-6.7		6.5			***	32.4072		6			***	293.857		0.0081	***		***	1010.6		1.13	***
1987-01-13	2.7		8.2		-0.2		2.8		2.7		2.9		2.7		5.5		9.1		-4.3		-4.2		-4.6		4.5			***	108.796		23			***	270.364		-0.0045	***		***	991.4		1.45	***
1987-01-14	0.9		6.1		-4.1		2.3		2.9		1.8		2.8		5.4		9		-11		-10.6		-10.4		0			***	128.471		-6			***	249.329		0.0078	***		***	1009.3		1.1	***
1987-01-15	2.8		10.3		-4.9		4.1		4.6		1.5		2.5		5.4		8.9		-5.8		-6		-6.5		0			***	126.157		4			***	262.077		0.0057	***		***	1017.8		1.12	***
1987-01-16	4.3		10.7		-1.1		5.4		5.7		3.3		3		5.3		8.8		-1.4		-1.7		-2.6		0			***	82.1754		16			***	293.703		0.0092	***		***	1020.4		0.5496	***
1987-01-17	6.7		15.2		-0.3		7.6		7.9		4.4		3.8		5.3		8.7		-1.2		-1.5		-2.4		0			***	98.379		3			***	295.943		0.0076			***	1003.7		0.82	***
1987-01-18	4.4		9.2		-1.9		5		5.2		3.6		4		5.4		8.7		-9.5		-9.4		-9.6		0			***	128.471		-7			***	264.981		0.0091			***	1009.2		1.42
1987-01-19	1.5		8.3		-3.3		1.9		2.2		2.5		3.4		5.5		8.6		-6.8		-6.8		-7.1		0			***	96.0642		4			***	272.144		0.0101			***	1009.4		1.02
1987-01-20	-0.9		4.5		-7.3		-0.1		-0.1		2.8		3.4		5.5		8.6		-10.7		-10.5		-10.9		1			***	133.101		2			***	243.192		0.0068			***	1016.2		0.92
[truncated: 11,303 more rows]
