# Supplementary figures and images for: A database of water and heat observations over grassland in the north-east of Japan
Source: Copernicus journal article supplement (doi:10.5194/essd-10-2295-2018), 2018-12-18

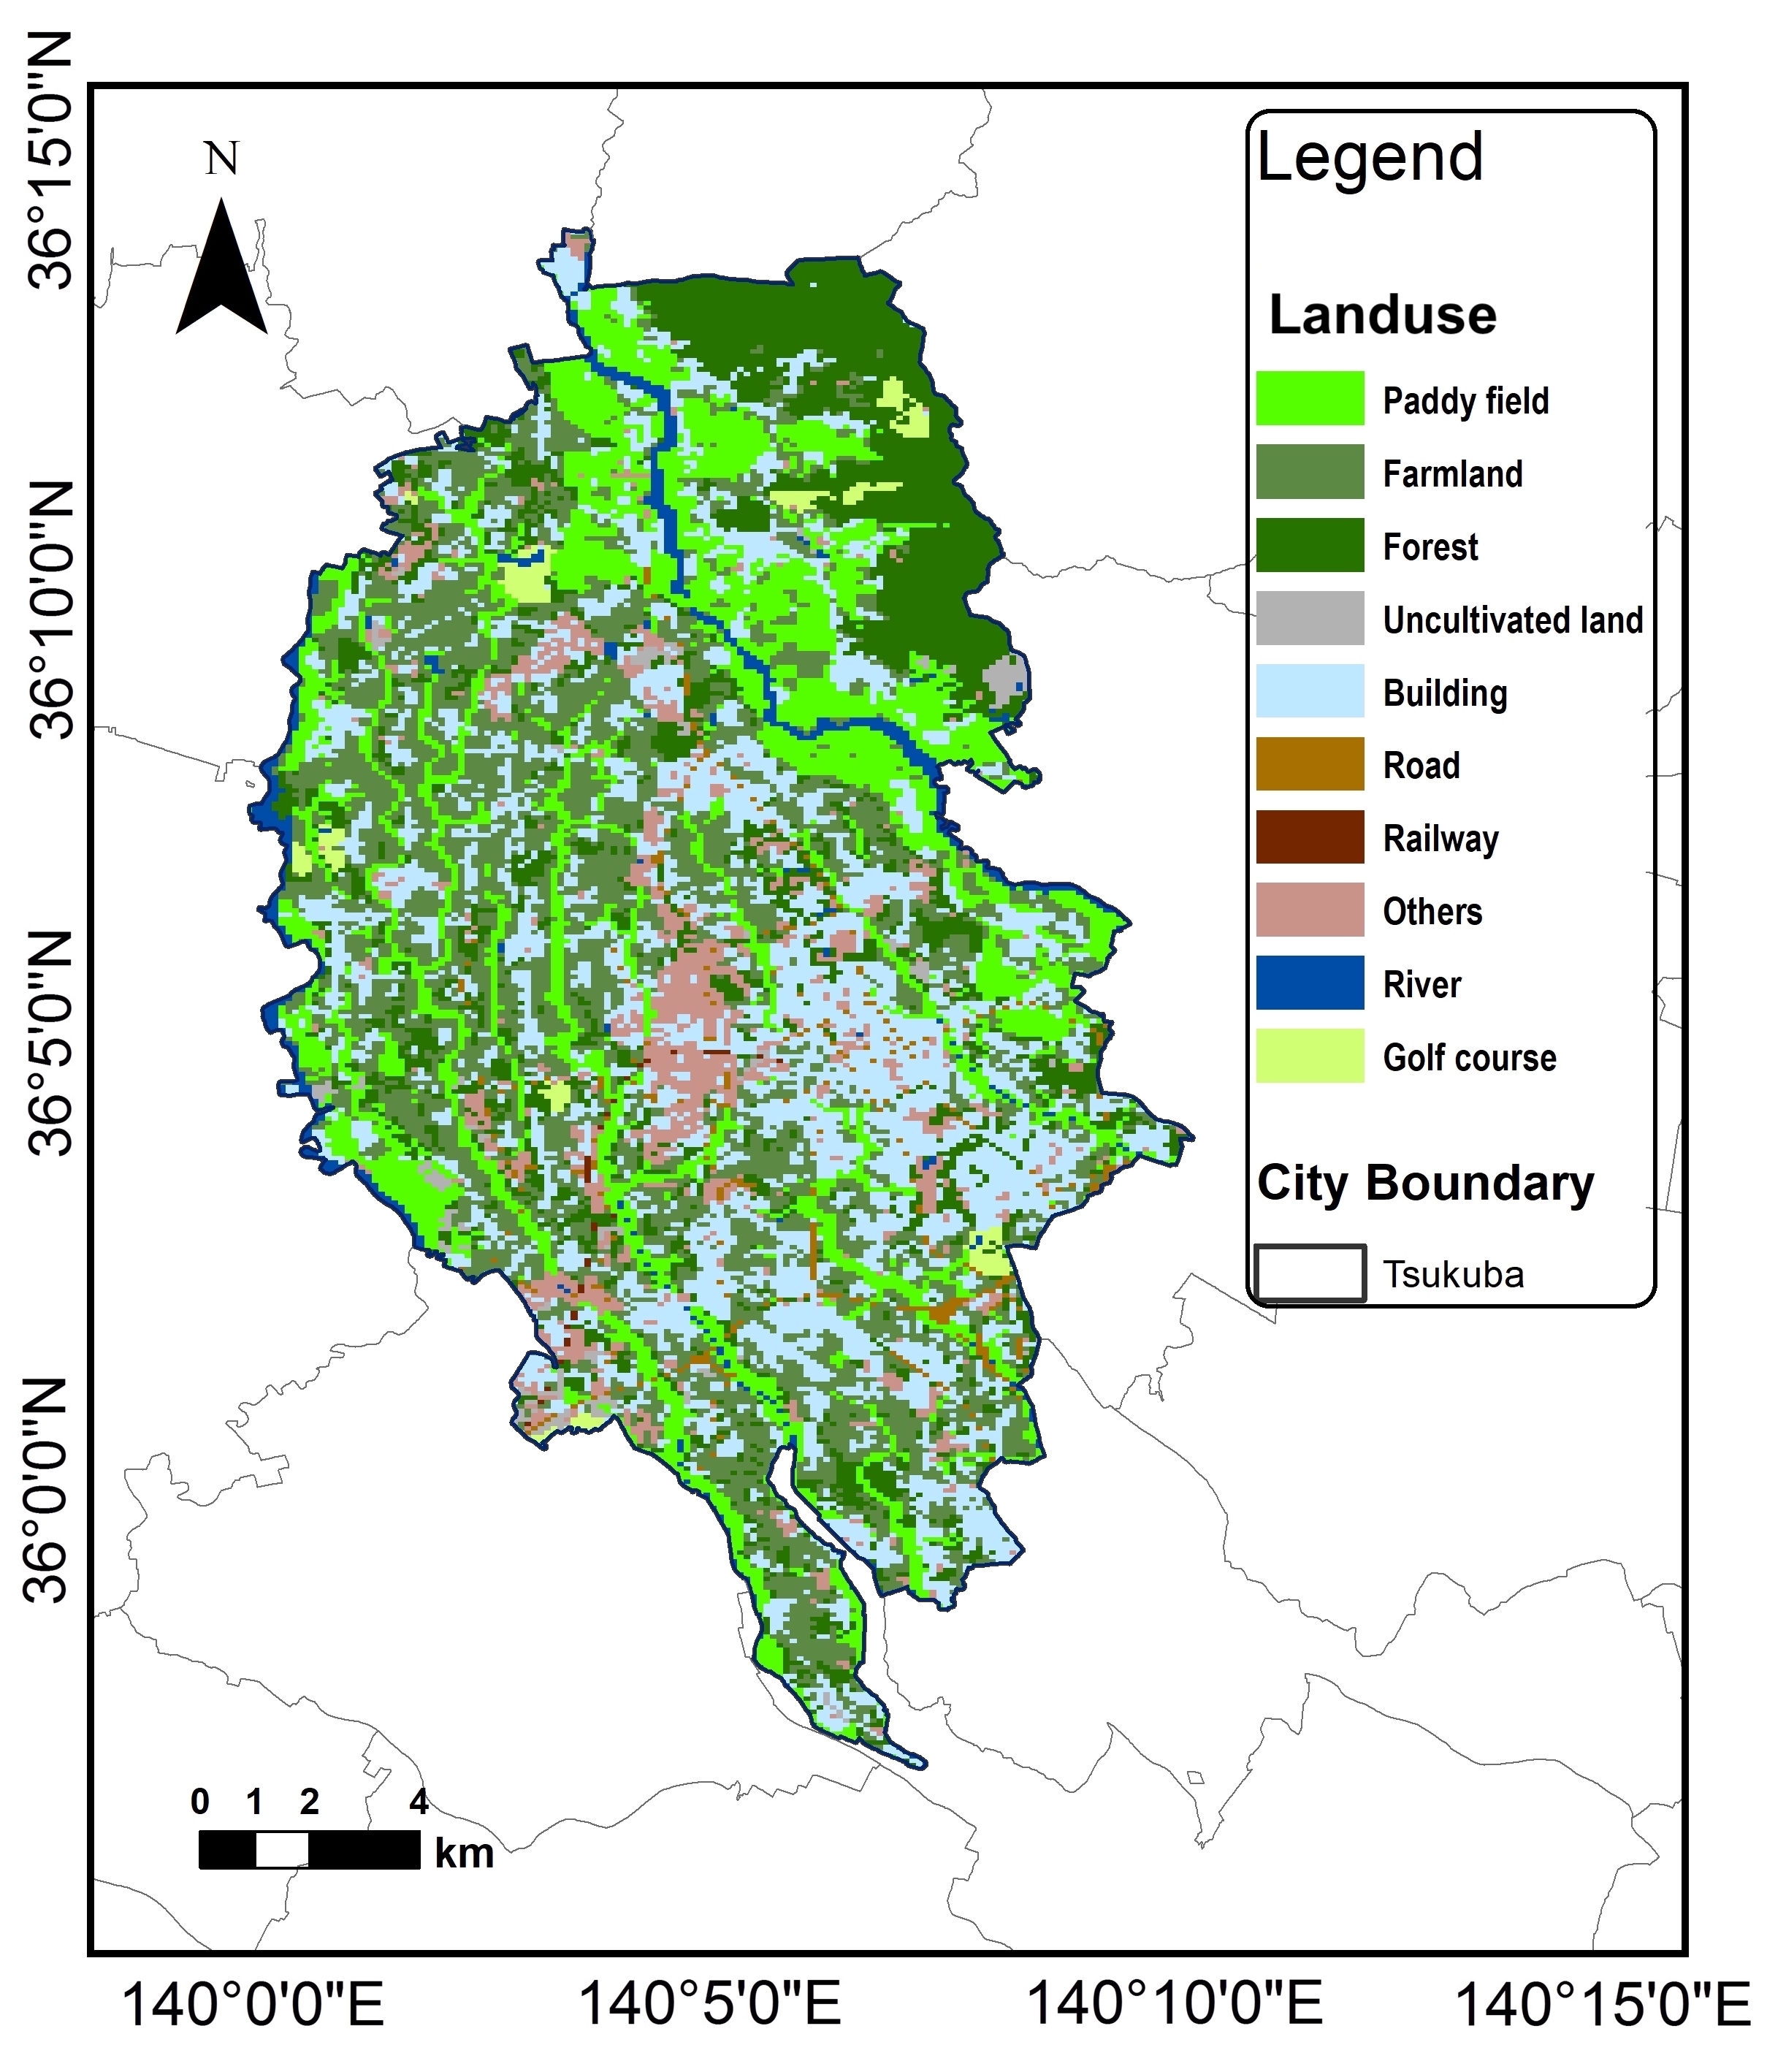

Supplement: Supplementary file 1 [file essd-10-2295-2018-supplement.zip › Supplement/Supplement_Landuse.jpg]
